# Supplementary material for: Genome-Wide Association Studies for Cerebrospinal Fluid Soluble TREM2 in Alzheimer’s Disease
Source: Front Aging Neurosci. 2019 Oct 25;11:297. doi: 10.3389/fnagi.2019.00297 (PMC6823606; doi:10.3389/fnagi.2019.00297)
Supplement: Supplementary file 4 [file Table_3.XLSX]

## Sheet: eQTL_TREM2_cis_4-6-19_map
SNP	Probe ID	Gene	statistic	p-value	FDR	beta
rs12453	11749293_x_at	MS4A6A	10.1568	9.02178e-23	8.13945e-19	0.132023
rs7926354	11749293_x_at	MS4A6A	10.0141	3.23555e-22	1.37487e-18	0.129848
rs7232	11749293_x_at	MS4A6A	9.97518	4.57172e-22	1.37487e-18	0.130207
rs7926344	11749293_x_at	MS4A6A	9.73662	3.72599e-21	8.40396e-18	0.126981
rs4938933	11749293_x_at	MS4A6A	9.63918	8.68222e-21	1.49967e-17	0.127243
rs7929589	11749293_x_at	MS4A6A	9.62313	9.97343e-21	1.49967e-17	0.125949
rs1530914	11749293_x_at	MS4A6A	9.56247	1.68226e-20	2.1682e-17	0.125505
rs6591559	11749293_x_at	MS4A6A	9.53328	2.16131e-20	2.43742e-17	0.125253
rs610932	11749293_x_at	MS4A6A	9.32763	1.24287e-19	1.24591e-16	0.122198
rs611267	11749293_x_at	MS4A6A	8.99701	1.94543e-18	1.75516e-15	0.118047
rs11230160	11749293_x_at	MS4A6A	8.92798	3.42116e-18	2.57214e-15	0.113916
rs920573	11749293_x_at	MS4A6A	8.92798	3.42116e-18	2.57214e-15	0.113916
rs7232	11716846_a_at	MS4A6A	8.85282	6.30181e-18	4.08032e-15	0.10358
rs12453	11716846_a_at	MS4A6A	8.85224	6.33169e-18	4.08032e-15	0.103366
rs7926354	11716846_a_at	MS4A6A	8.77344	1.19605e-17	7.19387e-15	0.102106
rs2070970	11749293_x_at	MS4A6A	8.63898	3.50415e-17	1.90199e-14	0.108441
rs1582763	11749293_x_at	MS4A6A	8.63615	3.58388e-17	1.90199e-14	0.118963
rs7926344	11716846_a_at	MS4A6A	8.56984	6.0594e-17	3.03711e-14	0.100202
rs4938933	11716846_a_at	MS4A6A	8.54807	7.19452e-17	3.41626e-14	0.101075
rs2583476	11749293_x_at	MS4A6A	8.53713	7.84139e-17	3.53725e-14	0.107496
rs7929589	11716846_a_at	MS4A6A	8.50522	1.00773e-16	4.3294e-14	0.0997375
rs1441586	11749293_x_at	MS4A6A	8.49543	1.08818e-16	4.46253e-14	0.108166
rs502581	11749293_x_at	MS4A6A	8.41886	1.97913e-16	7.76336e-14	0.106794
rs2847655	11749293_x_at	MS4A6A	8.41225	2.0837e-16	7.83296e-14	0.106428
rs1530914	11716846_a_at	MS4A6A	8.39045	2.46842e-16	8.90803e-14	0.0987165
rs6591559	11716846_a_at	MS4A6A	8.38252	2.62505e-16	9.05182e-14	0.0987013
rs2847666	11749293_x_at	MS4A6A	8.37846	2.70892e-16	9.05182e-14	0.105767
rs583296	11749293_x_at	MS4A6A	8.28504	5.57237e-16	1.7955e-13	0.10656
rs202153656	11749293_x_at	MS4A6A	8.20354	1.03989e-15	3.20202e-13	0.105691
rs72810671	11725475_at	ZNF354A	8.20044	1.06474e-15	3.20202e-13	0.434148
rs11230160	11716846_a_at	MS4A6A	8.10994	2.11595e-15	5.96564e-13	0.0923654
rs920573	11716846_a_at	MS4A6A	8.10994	2.11595e-15	5.96564e-13	0.0923654
rs610932	11716846_a_at	MS4A6A	8.09235	2.41636e-15	6.60618e-13	0.0950689
rs684961	11749293_x_at	MS4A6A	8.07474	2.75905e-15	7.32121e-13	0.104286
rs525794	11749293_x_at	MS4A6A	8.0176	4.23702e-15	1.09218e-12	0.103825
rs2070970	11716846_a_at	MS4A6A	7.79238	2.24267e-14	5.62038e-12	0.0873126
rs2583476	11716846_a_at	MS4A6A	7.7575	2.89289e-14	7.05397e-12	0.0871283
rs611267	11716846_a_at	MS4A6A	7.72754	3.5976e-14	8.54146e-12	0.0909152
rs610932	11723849_a_at	MS4A6A	7.66225	5.77078e-14	1.33497e-11	0.141948
rs2847666	11716846_a_at	MS4A6A	7.61032	8.38418e-14	1.89105e-11	0.0856727
rs2847655	11716846_a_at	MS4A6A	7.56782	1.13644e-13	2.50073e-11	0.0854471
rs1582763	11716846_a_at	MS4A6A	7.54349	1.35173e-13	2.90365e-11	0.0929763
rs502581	11716846_a_at	MS4A6A	7.45685	2.49775e-13	5.24064e-11	0.0845115
rs667897	11749293_x_at	MS4A6A	7.4481	2.65681e-13	5.44768e-11	0.0963237
rs1441586	11716846_a_at	MS4A6A	7.3976	3.78846e-13	7.59544e-11	0.0842667
rs583296	11716846_a_at	MS4A6A	7.37499	4.43799e-13	8.70425e-11	0.0846956
rs202153656	11716846_a_at	MS4A6A	7.34101	5.62503e-13	1.07977e-10	0.0844043
rs684961	11716846_a_at	MS4A6A	7.12971	2.40653e-12	4.49872e-10	0.0822274
rs525794	11716846_a_at	MS4A6A	7.12747	2.44333e-12	4.49872e-10	0.0823764
rs11824734	11749293_x_at	MS4A6A	7.12326	2.51418e-12	4.53659e-10	0.0992598
rs10792263	11749293_x_at	MS4A6A	6.99469	5.97995e-12	1.05786e-09	0.0960251
rs2814778	11757035_a_at	ACKR1	6.9827	6.47875e-12	1.12406e-09	0.324339
rs684961	11723849_a_at	MS4A6A	6.77202	2.59852e-11	4.42336e-09	0.123028
rs1441586	11723849_a_at	MS4A6A	6.71916	3.66144e-11	6.11731e-09	0.120918
rs525794	11723849_a_at	MS4A6A	6.69663	4.23467e-11	6.94639e-09	0.121994
rs610932	11760710_a_at	MS4A6A	6.57758	9.07013e-11	1.46126e-08	0.168018
rs2814778	11734314_at	SPTA1	-6.39515	2.84941e-10	4.49774e-08	-0.477708
rs667897	11716846_a_at	MS4A6A	6.39279	2.89147e-10	4.49774e-08	0.0738485
rs528823	11749293_x_at	MS4A6A	6.35561	3.63879e-10	5.56426e-08	0.0957274
rs1530914	11751570_a_at	MS4A4A	6.34024	4.00006e-10	5.98238e-08	0.193713
rs667897	11723849_a_at	MS4A6A	6.33843	4.04484e-10	5.98238e-08	0.115025
rs6591559	11751570_a_at	MS4A4A	6.29937	5.14055e-10	7.47289e-08	0.192665
rs1151065	11749293_x_at	MS4A6A	6.29692	5.21827e-10	7.47289e-08	0.0955794
rs558788	11749293_x_at	MS4A6A	6.27165	6.08897e-10	8.58355e-08	0.0952575
rs6591559	11732866_x_at	MS4A4A	6.18784	1.01211e-09	1.40481e-07	0.218497
rs1530914	11732866_x_at	MS4A4A	6.17492	1.09405e-09	1.49553e-07	0.217909
rs554311	11749293_x_at	MS4A6A	6.13864	1.36015e-09	1.83153e-07	0.0936304
rs4938933	11751570_a_at	MS4A4A	6.0139	2.8517e-09	3.78353e-07	0.185451
rs502581	11723849_a_at	MS4A6A	6.00619	2.98406e-09	3.90176e-07	0.10823
rs11824734	11716846_a_at	MS4A6A	5.99729	3.14413e-09	4.05234e-07	0.0746594
rs549680	11749293_x_at	MS4A6A	5.96935	3.70308e-09	4.70552e-07	0.0911679
rs7929589	11732866_x_at	MS4A4A	5.96385	3.82407e-09	4.79178e-07	0.210368
rs6591559	11732865_a_at	MS4A4A	5.9598	3.91542e-09	4.82215e-07	0.219464
rs7929589	11751570_a_at	MS4A4A	5.95807	3.95521e-09	4.82215e-07	0.182208
rs4938933	11732866_x_at	MS4A4A	5.94872	4.17695e-09	5.02459e-07	0.211702
rs583296	11723849_a_at	MS4A6A	5.92678	4.74571e-09	5.63365e-07	0.108204
rs1530914	11732865_a_at	MS4A4A	5.89491	5.70859e-09	6.58191e-07	0.217028
rs543695	11749293_x_at	MS4A6A	5.89397	5.73964e-09	6.58191e-07	0.0837368
rs202153656	11723849_a_at	MS4A6A	5.89325	5.76337e-09	6.58191e-07	0.107711
rs10792263	11716846_a_at	MS4A6A	5.84209	7.7385e-09	8.7271e-07	0.0716533
rs684961	11760710_a_at	MS4A6A	5.79814	9.95001e-09	1.10826e-06	0.144963
rs12453	11751570_a_at	MS4A4A	5.78246	1.08795e-08	1.19702e-06	0.176978
rs4938933	11732865_a_at	MS4A4A	5.77432	1.13945e-08	1.23857e-06	0.214203
rs7926344	11751570_a_at	MS4A4A	5.77016	1.16667e-08	1.25305e-06	0.176319
rs611267	11723849_a_at	MS4A6A	5.76653	1.19097e-08	1.26411e-06	0.108348
rs7929589	11732865_a_at	MS4A4A	5.76011	1.23514e-08	1.29574e-06	0.211838
rs2814778	11756050_x_at	CD1E	-5.74786	1.32383e-08	1.37283e-06	-0.130798
rs12453	11732866_x_at	MS4A4A	5.74236	1.3657e-08	1.40015e-06	0.202786
rs1441586	11760710_a_at	MS4A6A	5.73927	1.38979e-08	1.40884e-06	0.142137
rs525794	11760710_a_at	MS4A6A	5.7218	1.53372e-08	1.53747e-06	0.143438
rs667897	11760710_a_at	MS4A6A	5.71865	1.56119e-08	1.54781e-06	0.142383
rs7926354	11732866_x_at	MS4A4A	5.66911	2.06169e-08	2.0218e-06	0.199474
rs7926344	11732866_x_at	MS4A4A	5.66476	2.11236e-08	2.04922e-06	0.199822
rs2070970	11751570_a_at	MS4A4A	5.65787	2.19527e-08	2.10699e-06	0.164509
rs7232	11751570_a_at	MS4A4A	5.64716	2.33045e-08	2.21319e-06	0.173359
rs7232	11732866_x_at	MS4A4A	5.64192	2.39942e-08	2.25496e-06	0.199788
rs1582763	11751570_a_at	MS4A4A	5.63043	2.55778e-08	2.379e-06	0.179687
rs7232	11732865_a_at	MS4A4A	5.62147	2.68836e-08	2.47493e-06	0.207254
rs7926354	11732865_a_at	MS4A4A	5.60639	2.92282e-08	2.66361e-06	0.205447
rs583296	11760710_a_at	MS4A6A	5.58991	3.20177e-08	2.88864e-06	0.139694
rs7926344	11732865_a_at	MS4A4A	5.58175	3.34923e-08	2.99176e-06	0.205089
rs1582763	11732866_x_at	MS4A4A	5.5531	3.92125e-08	3.46839e-06	0.204534
rs202153656	11760710_a_at	MS4A6A	5.52712	4.52149e-08	3.96047e-06	0.138306
rs11230160	11751570_a_at	MS4A4A	5.49779	5.30637e-08	4.51668e-06	0.163188
rs920573	11751570_a_at	MS4A4A	5.49779	5.30637e-08	4.51668e-06	0.163188
rs2583476	11751570_a_at	MS4A4A	5.49778	5.30667e-08	4.51668e-06	0.160366
rs7926354	11751570_a_at	MS4A4A	5.44622	7.01867e-08	5.91799e-06	0.166401
rs1582763	11732865_a_at	MS4A4A	5.43827	7.32635e-08	6.12022e-06	0.208686
rs12453	11732865_a_at	MS4A4A	5.43578	7.42567e-08	6.14627e-06	0.200274
rs502581	11760710_a_at	MS4A6A	5.42633	7.81363e-08	6.4086e-06	0.134086
rs189740529	11721792_at	RGMB	-5.40345	8.83578e-08	7.18166e-06	-0.987226
rs61897943	11716846_a_at	MS4A6A	5.36448	1.08833e-07	8.76688e-06	0.120016
rs11230160	11732866_x_at	MS4A4A	5.34743	1.19168e-07	9.43099e-06	0.183281
rs920573	11732866_x_at	MS4A4A	5.34743	1.19168e-07	9.43099e-06	0.183281
rs573790	11749293_x_at	MS4A6A	-5.3154	1.41228e-07	1.10796e-05	-0.0717043
rs2847666	11751570_a_at	MS4A4A	5.31275	1.43223e-07	1.11393e-05	0.155309
rs2070970	11732866_x_at	MS4A4A	5.29384	1.58256e-07	1.22033e-05	0.178012
rs61897943	11749293_x_at	MS4A6A	5.28682	1.64216e-07	1.25555e-05	0.133728
rs2847655	11751570_a_at	MS4A4A	5.27761	1.72369e-07	1.30682e-05	0.154714
rs2583476	11732866_x_at	MS4A4A	5.23093	2.20095e-07	1.65475e-05	0.17633
rs61897945	11716846_a_at	MS4A6A	5.20562	2.51087e-07	1.87215e-05	0.115384
rs528823	11716846_a_at	MS4A6A	5.1865	2.77262e-07	2.05038e-05	0.0697396
rs610932	11732866_x_at	MS4A4A	5.17801	2.89712e-07	2.12503e-05	0.183247
rs525794	11732866_x_at	MS4A4A	5.16988	3.02131e-07	2.19824e-05	0.178347
rs78809000	11722011_a_at	GIMAP4	5.16333	3.12513e-07	2.2556e-05	0.163035
rs1151065	11732866_x_at	MS4A4A	5.14044	3.51596e-07	2.51754e-05	0.204673
rs61897945	11749293_x_at	MS4A6A	5.13645	3.5888e-07	2.54946e-05	0.128712
rs115619982	11751401_a_at	PRPSAP1	5.12346	3.83613e-07	2.70387e-05	0.929582
rs1441586	11751570_a_at	MS4A4A	5.11974	3.9098e-07	2.73444e-05	0.151338
rs1441586	11732866_x_at	MS4A4A	5.10294	4.26038e-07	2.9567e-05	0.174013
rs611267	11760710_a_at	MS4A6A	5.09578	4.41905e-07	3.04341e-05	0.131352
rs558788	11732866_x_at	MS4A4A	5.08857	4.58443e-07	3.13339e-05	0.202768
rs528823	11732866_x_at	MS4A4A	5.07237	4.97809e-07	3.37686e-05	0.200595
rs1151065	11716846_a_at	MS4A6A	5.04462	5.72958e-07	3.85763e-05	0.0683906
rs2070970	11732865_a_at	MS4A4A	5.041	5.83537e-07	3.89975e-05	0.17676
rs554311	11716846_a_at	MS4A6A	5.03434	6.03483e-07	4.0034e-05	0.0685009
rs558788	11716846_a_at	MS4A6A	5.01984	6.49213e-07	4.27533e-05	0.068096
rs9839996	11752280_a_at	RBM5	5.01609	6.61602e-07	4.32534e-05	1.23705
rs11230160	11732865_a_at	MS4A4A	4.99987	7.17732e-07	4.62527e-05	0.178814
rs920573	11732865_a_at	MS4A4A	4.99987	7.17732e-07	4.62527e-05	0.178814
rs78809000	11722012_a_at	GIMAP4	4.97834	7.99443e-07	5.10374e-05	0.196274
rs78809000	11739720_a_at	GIMAP8	4.97738	8.03293e-07	5.10374e-05	0.209224
rs2814778	11725827_s_at	CD1D	4.95903	8.80262e-07	5.55365e-05	0.201584
rs610932	11751570_a_at	MS4A4A	4.95292	9.07439e-07	5.68536e-05	0.152186
rs2814778	11756683_a_at	CD1E	-4.94911	9.24808e-07	5.75422e-05	-0.17311
rs2847655	11732866_x_at	MS4A4A	4.94688	9.35118e-07	5.77851e-05	0.167648
rs583296	11751570_a_at	MS4A4A	4.94307	9.52968e-07	5.84876e-05	0.147451
rs9603820	11757529_s_at	LAMP1	4.93098	1.0119e-06	6.16847e-05	0.0968185
rs684961	11751570_a_at	MS4A4A	4.92808	1.02654e-06	6.21574e-05	0.147311
rs502581	11751570_a_at	MS4A4A	4.9265	1.03458e-06	6.22264e-05	0.145154
rs202153656	11751570_a_at	MS4A4A	4.90872	1.12964e-06	6.74941e-05	0.146584
rs573790	11716846_a_at	MS4A6A	-4.90731	1.13752e-06	6.7518e-05	-0.0587436
rs202153656	11732866_x_at	MS4A4A	4.8855	1.26656e-06	7.43319e-05	0.168307
rs583296	11732866_x_at	MS4A4A	4.88514	1.2688e-06	7.43319e-05	0.168151
rs2583476	11732865_a_at	MS4A4A	4.88239	1.28605e-06	7.48565e-05	0.171724
rs10792263	11732866_x_at	MS4A4A	4.87633	1.3249e-06	7.66236e-05	0.176958
rs2847666	11732866_x_at	MS4A4A	4.86661	1.38962e-06	7.98544e-05	0.164592
rs684961	11732866_x_at	MS4A4A	4.86255	1.41749e-06	8.09402e-05	0.167732
rs11824734	11732866_x_at	MS4A4A	4.84843	1.51882e-06	8.61811e-05	0.178828
rs78809000	11747438_a_at	GIMAP4	4.84672	1.53158e-06	8.63618e-05	0.180696
rs2847655	11732865_a_at	MS4A4A	4.84306	1.55918e-06	8.73722e-05	0.170971
rs10792263	11751570_a_at	MS4A4A	4.8274	1.68278e-06	9.37162e-05	0.15192
rs185302072	11715370_s_at	LGALS3BP	-4.82545	1.69884e-06	9.40304e-05	-2.53381
rs611267	11751570_a_at	MS4A4A	4.82006	1.74394e-06	9.59381e-05	0.14791
rs543695	11716846_a_at	MS4A6A	4.80136	1.90949e-06	0.000104409	0.0608288
rs549680	11732866_x_at	MS4A4A	4.79881	1.9332e-06	0.000105068	0.192183
rs525794	11751570_a_at	MS4A4A	4.78585	2.05827e-06	0.000111196	0.143491
rs549680	11716846_a_at	MS4A6A	4.7746	2.17305e-06	0.000116624	0.0650748
rs554311	11732866_x_at	MS4A4A	4.7735	2.1846e-06	0.000116624	0.191202
rs502581	11732866_x_at	MS4A4A	4.76766	2.24688e-06	0.000119243	0.162199
rs2847666	11732865_a_at	MS4A4A	4.76484	2.27755e-06	0.000120164	0.167863
rs611267	11732866_x_at	MS4A4A	4.72256	2.78904e-06	0.000146295	0.167264
rs11824734	11751570_a_at	MS4A4A	4.71851	2.84354e-06	0.000148292	0.151002
rs610932	11732865_a_at	MS4A4A	4.71577	2.88092e-06	0.000149378	0.174252
rs611267	11732865_a_at	MS4A4A	4.70074	3.09461e-06	0.00015954	0.173338
rs525794	11732865_a_at	MS4A4A	4.69934	3.11534e-06	0.000159696	0.169275
rs1151065	11732865_a_at	MS4A4A	4.68216	3.37994e-06	0.000172282	0.194643
rs558788	11732865_a_at	MS4A4A	4.66266	3.70634e-06	0.000187857	0.193941
rs528823	11732865_a_at	MS4A4A	4.60699	4.81391e-06	0.000242632	0.190222
rs543695	11732866_x_at	MS4A4A	4.60565	4.84428e-06	0.000242806	0.171686
rs1441586	11732865_a_at	MS4A4A	4.58105	5.43261e-06	0.00027079	0.163161
rs56157839	11749293_x_at	MS4A6A	4.48751	8.3599e-06	0.000414412	0.073612
rs115619982	11743992_at	UBE2O	-4.44295	1.02379e-05	0.000504734	-2.0711
rs583296	11732865_a_at	MS4A4A	4.43359	1.06806e-05	0.000523697	0.159305
rs202153656	11732865_a_at	MS4A4A	4.42607	1.10497e-05	0.000538869	0.159178
rs1151065	11751570_a_at	MS4A4A	4.41287	1.17267e-05	0.000568807	0.153024
rs684961	11732865_a_at	MS4A4A	4.40308	1.22547e-05	0.000591242	0.158553
rs11824734	11732865_a_at	MS4A4A	4.39004	1.29928e-05	0.000622351	0.169029
rs543695	11732865_a_at	MS4A4A	4.38844	1.30865e-05	0.000622351	0.170514
rs2814778	11729251_at	MNDA	4.3881	1.31065e-05	0.000622351	0.0676848
rs549680	11732865_a_at	MS4A4A	4.37903	1.36493e-05	0.000644731	0.183025
rs4938933	11760710_a_at	MS4A6A	4.36589	1.44744e-05	0.000680147	0.114569
rs554311	11751570_a_at	MS4A4A	4.34466	1.59085e-05	0.000743661	0.151259
rs9839996	11716007_a_at	RBM5	4.31939	1.77922e-05	0.000827431	0.761411
rs558788	11751570_a_at	MS4A4A	4.31005	1.85412e-05	0.000857838	0.149614
rs502581	11732865_a_at	MS4A4A	4.30715	1.87804e-05	0.000864472	0.152959
rs61897948	11749293_x_at	MS4A6A	4.28506	2.0696e-05	0.000947812	0.0706685
rs543695	11751570_a_at	MS4A4A	4.25993	2.31019e-05	0.00104796	0.137948
rs554311	11732865_a_at	MS4A4A	4.2598	2.31151e-05	0.00104796	0.178165
rs10792263	11732865_a_at	MS4A4A	4.25846	2.3251e-05	0.00104885	0.161471
rs667897	11751570_a_at	MS4A4A	4.24272	2.49019e-05	0.00111774	0.126749
rs549680	11751570_a_at	MS4A4A	4.23809	2.54086e-05	0.00113483	0.147637
rs9603820	11725349_s_at	TFDP1	-4.18723	3.16587e-05	0.00140702	-0.343105
rs528823	11751570_a_at	MS4A4A	4.18296	3.22442e-05	0.00142602	0.144192
rs6591559	11760710_a_at	MS4A6A	4.12608	4.11152e-05	0.00180947	0.107781
rs11230229	11749293_x_at	MS4A6A	4.10977	4.40584e-05	0.00192959	0.054519
rs1530914	11760710_a_at	MS4A6A	4.07157	5.17579e-05	0.00225584	0.106313
rs9603820	11725348_x_at	TFDP1	-4.04247	5.84621e-05	0.00253579	-0.335444
rs61897943	11732865_a_at	MS4A4A	4.03156	6.11832e-05	0.00264112	0.278219
rs72810671	11726516_s_at	CLK4	4.02915	6.17987e-05	0.00265499	0.19401
rs9839996	11754588_a_at	RBM5	3.95689	8.32819e-05	0.00356099	0.71392
rs201877628	11744575_a_at	ELOVL2	-3.95534	8.38128e-05	0.00356679	-0.512208
rs59224344	11749293_x_at	MS4A6A	3.92764	9.38487e-05	0.00397513	0.0673867
rs61897945	11732865_a_at	MS4A4A	3.925	9.4863e-05	0.00399932	0.268214
rs543695	11760710_a_at	MS4A6A	3.9128	9.96828e-05	0.00418297	0.106827
rs9839996	11752281_x_at	RBM5	3.87033	0.000118337	0.00494277	0.862612
rs115619982	11752981_x_at	WBP2	-3.85665	0.000125015	0.00519763	-1.07964
rs115619982	11720061_s_at	WBP2	-3.84271	0.000132187	0.00547059	-0.901982
rs75265799	11725745_a_at	SORBS1	-3.83627	0.00013563	0.00558745	-0.290738
rs61897943	11732866_x_at	MS4A4A	3.81976	0.000144847	0.00594005	0.253504
rs7232	11760710_a_at	MS4A6A	3.80254	0.000155088	0.00633124	0.0993655
rs11230229	11716846_a_at	MS4A6A	3.77283	0.000174383	0.00708687	0.0443694
rs61897943	11751570_a_at	MS4A4A	3.76938	0.000176761	0.00715129	0.216929
rs667897	11732866_x_at	MS4A4A	3.76554	0.000179449	0.00722762	0.130089
rs75265799	11725743_s_at	SORBS1	-3.75717	0.000185441	0.00743576	-0.551445
rs11230228	11751570_a_at	MS4A4A	-3.7506	0.000190273	0.00759576	-0.126457
rs115619982	11754500_at	SMIM6	-3.74067	0.000197804	0.00786163	-0.572247
rs75411903	11740331_at	RTP3	-3.72016	0.000214252	0.00847801	-0.420746
rs61897945	11732866_x_at	MS4A4A	3.71783	0.000216203	0.00851783	0.244311
rs201877628	11730633_at	MAK	3.71466	0.000218873	0.00858554	1.47705
rs61897948	11751570_a_at	MS4A4A	3.66179	0.000268397	0.0104826	0.136606
rs79727142	11718644_x_at	OSBPL8	-3.65935	0.000270919	0.0105355	-0.3149
rs79727142	11718643_a_at	OSBPL8	-3.63152	0.000301297	0.0116665	-0.342787
rs7926354	11760710_a_at	MS4A6A	3.62209	0.000312299	0.0120408	0.0941506
rs181768270	11737898_a_at	TRIM17	-3.60251	0.000336356	0.0128869	-0.499487
rs61897943	11756780_a_at	MS4A7	3.60179	0.00033727	0.0128869	0.201149
rs12453	11760710_a_at	MS4A6A	3.60081	0.000338527	0.0128869	0.0939987
rs1495986	11740271_at	MAP10	3.59241	0.000349427	0.0132459	0.0631268
rs115619982	11748023_x_at	WBP2	-3.58333	0.000361589	0.0136496	-1.05033
rs56157839	11716846_a_at	MS4A6A	3.574	0.000374496	0.0140779	0.0521365
rs7929589	11760710_a_at	MS4A6A	3.55983	0.000394936	0.014758	0.0929978
rs9603820	11725347_a_at	TFDP1	-3.55921	0.000395859	0.014758	-0.330095
rs9603820	11748055_x_at	TFDP1	-3.55338	0.00040458	0.0150211	-0.280445
rs9603820	11746107_a_at	CDC16	-3.55197	0.000406719	0.0150386	-0.30011
rs12340865	11741698_a_at	LCN12	-3.52683	0.000446636	0.0164471	-0.767286
rs10487776	11738336_at	C7orf65	-3.52383	0.000451632	0.0165635	-0.285029
rs56157839	11751570_a_at	MS4A4A	3.51482	0.000466986	0.0170573	0.130669
rs1582763	11760710_a_at	MS4A6A	3.50666	0.000481283	0.0175086	0.0953866
rs72810671	11726515_a_at	CLK4	3.49963	0.000493938	0.0178968	0.197515
rs667897	11732865_a_at	MS4A4A	3.49628	0.000500083	0.0180183	0.125902
rs75411903	11728485_x_at	LIMD1	-3.49563	0.000501284	0.0180183	-0.821516
rs61897945	11751570_a_at	MS4A4A	3.47498	0.000540827	0.0193625	0.198199
rs115619982	11752896_at	MIF4GD	3.45757	0.000576401	0.0205545	0.639034
rs7926344	11760710_a_at	MS4A6A	3.4191	0.000662891	0.0235457	0.0891801
rs9603820	11753963_x_at	LAMP1	3.40992	0.00068525	0.0242444	0.127168
rs113239743	11754953_a_at	C1orf198	-3.40684	0.000692896	0.0244192	-1.31435
rs72810671	11726514_a_at	CLK4	3.39706	0.00071776	0.025197	0.198793
rs9984933	11757231_s_at	CHODL-AS1	-3.37469	0.000777721	0.0271011	-0.382821
rs61897948	11716846_a_at	MS4A6A	3.37459	0.000778007	0.0271011	0.0494795
rs11230160	11760710_a_at	MS4A6A	3.37012	0.000790537	0.0273265	0.0852351
rs920573	11760710_a_at	MS4A6A	3.37012	0.000790537	0.0273265	0.0852351
rs61897945	11748336_a_at	GIF	-3.33576	0.00089334	0.0307622	-0.0545843
rs61897943	11748336_a_at	GIF	-3.32434	0.00093018	0.0319091	-0.0549689
rs115619982	11753429_a_at	WBP2	-3.31836	0.000950002	0.0324656	-1.06131
rs115619982	11761151_a_at	GGA3	-3.31536	0.00096011	0.0326872	-0.45161
rs72810671	11757726_x_at	NHP2	3.31415	0.000964215	0.0327036	0.0751313
rs76228983	11727653_at	SRRM4	-3.30427	0.000998326	0.0337337	-0.214384
rs77001965	11749747_s_at	SNW1	3.29303	0.00103852	0.0349467	0.622431
rs112259525	11731293_at	SLITRK1	-3.29199	0.00104231	0.0349467	-0.100859
rs193222145	11745196_a_at	ADI1	-3.29102	0.00104584	0.0349467	-0.482814
rs75135281	11716331_a_at	DNAJB6	3.28959	0.00105109	0.0349923	0.799584
rs6752526	11717956_s_at	STK39	3.28668	0.00106185	0.0352206	0.451695
rs61897945	11756780_a_at	MS4A7	3.28414	0.00107133	0.0354049	0.181778
rs16851571	11717956_s_at	STK39	3.28178	0.00108021	0.0355679	0.451033
rs59224344	11716846_a_at	MS4A6A	3.27995	0.00108711	0.0356652	0.0499553
rs543695	11723849_a_at	MS4A6A	3.27012	0.00112507	0.0367767	0.0655902
rs115619982	11753430_x_at	WBP2	-3.26116	0.00116068	0.0377292	-0.995596
rs72810671	11763588_a_at	NSD1	-3.26069	0.00116257	0.0377292	-0.16436
rs113787062	11731293_at	SLITRK1	-3.24619	0.00122256	0.0395337	-0.101452
rs76713772	11750332_a_at	ASZ1	-3.24389	0.00123233	0.0397074	-0.45632
rs72810671	11729702_a_at	DBN1	-3.24286	0.00123674	0.0397077	-0.154157
rs75990347	11735536_at	ZNF660	-3.23526	0.00126967	0.0406203	-0.631811
rs59224344	11751570_a_at	MS4A4A	3.21152	0.00137777	0.043923	0.124656
rs116461055	11745102_a_at	NOX4	-3.20957	0.00138701	0.044062	-0.588237
rs114182264	11761815_at	LRRC8C	-3.20663	0.00140106	0.0443521	-0.52397
rs77276680	11729506_a_at	NPAS3	3.1941	0.00146245	0.0461337	0.10602
rs114241756	11725747_a_at	ATP2C1	-3.1803	0.00153291	0.0481879	-0.171179
rs11230229	11723849_a_at	MS4A6A	3.16476	0.00161603	0.0506245	0.0586067
rs75265799	11725744_x_at	SORBS1	-3.11576	0.00190599	0.0595012	-0.435338
rs112402574	11731293_at	SLITRK1	-3.09966	0.00201124	0.0625705	-0.0798327
rs41314286	11751163_a_at	PSEN2	-3.0978	0.00202376	0.0627434	-0.15609
rs113239743	11733825_s_at	C1orf198	-3.09463	0.00204519	0.0631909	-1.0398
rs10792263	11760710_a_at	MS4A6A	3.08459	0.0021146	0.0651124	0.0824402
rs9839996	11728950_at	LSMEM2	-3.08034	0.0021446	0.0655885	-0.868043
rs76089552	11728950_at	LSMEM2	-3.08034	0.0021446	0.0655885	-0.868043
rs9603820	11719625_a_at	CDC16	-3.07595	0.00217604	0.0663252	-0.15103
rs76089552	11727852_x_at	TEX264	-3.07131	0.00220968	0.0671237	-0.920505
rs79727142	11755548_a_at	OSBPL8	-3.06027	0.00229174	0.069383	-0.299828
rs72810671	11732120_a_at	DBN1	-3.05197	0.00235525	0.070958	-0.145598
rs11230228	11749293_x_at	MS4A6A	-3.05142	0.0023595	0.070958	-0.0457768
rs115619982	11744372_a_at	PRPSAP1	3.04714	0.00239288	0.0717229	0.529177
rs117718271	11739791_at	MOCS3	3.04328	0.00242342	0.0721184	0.189535
rs61744238	11741484_a_at	SCRN1	-3.0428	0.00242721	0.0721184	-0.569571
rs113105473	11731293_at	SLITRK1	-3.0418	0.00243521	0.0721184	-0.0932911
rs76406842	11733480_x_at	SUPT20H	3.04145	0.00243805	0.0721184	0.632811
rs73615423	11733330_at	CCDC170	-3.03198	0.00251485	0.0741469	-1.13414
rs76406842	11740220_a_at	SMAD9	-3.02494	0.00257341	0.0756264	-0.442704
rs77001965	11716088_s_at	SNW1	3.01452	0.00266228	0.0779244	0.64987
rs116862617	11737655_a_at	PIP5KL1	-3.01376	0.00266888	0.0779244	-0.213168
rs10487776	11739312_a_at	HUS1	2.99768	0.00281196	0.0818371	0.406559
rs72810671	11756853_a_at	CLK4	2.99098	0.00287367	0.0833643	0.16064
rs75411903	11718596_a_at	CCDC12	-2.9797	0.00298027	0.0861795	-0.515656
rs75265799	11740851_a_at	TCTN3	2.97808	0.00299592	0.0862926	0.511324
rs76713772	11720231_s_at	TES	-2.97731	0.00300331	0.0862926	-1.02215
rs11230229	11760710_a_at	MS4A6A	2.97488	0.00302698	0.0865716	0.0752782
rs116461055	11745103_x_at	NOX4	-2.97434	0.00303221	0.0865716	-0.48014
rs117493280	11738991_a_at	ATP6V0E2	-2.97157	0.00305932	0.0870701	-0.688246
rs573790	11760710_a_at	MS4A6A	-2.9664	0.00311066	0.0882527	-0.0769089
rs11230160	11756780_a_at	MS4A7	2.95895	0.00318594	0.0898237	0.0863777
rs920573	11756780_a_at	MS4A7	2.95895	0.00318594	0.0898237	0.0863777
rs59224344	11732865_a_at	MS4A4A	2.9505	0.00327328	0.0919985	0.137665
rs76713772	11754144_a_at	MET	-2.94527	0.00332846	0.0932589	-0.435832
rs11570112	11746952_x_at	MDK	-2.93758	0.00341116	0.09528	-0.799259
rs11824734	11760710_a_at	MS4A6A	2.92464	0.00355455	0.0989788	0.0794829
rs7528331	11730196_at	RNF187	-2.92336	0.00356898	0.0990749	-0.139313
rs72810671	11757725_a_at	NHP2	2.92055	0.00360098	0.0996566	0.066788
rs114106603	11744551_a_at	CHRNA3	-2.91168	0.00370359	0.102183	-0.191134
rs76841445	11732715_a_at	SLC45A2	-2.90995	0.00372395	0.102431	-0.322958
rs543695	11728750_a_at	OSBP	-2.90009	0.00384172	0.10535	-0.0567149
rs59224344	11732866_x_at	MS4A4A	2.89567	0.0038956	0.106503	0.129815
rs61744238	11718603_a_at	MTURN	-2.89058	0.00395858	0.107898	-1.59396
rs77560710	11730527_a_at	DAPK2	2.88832	0.00398675	0.108041	0.23895
rs115619982	11722729_a_at	METTL23	2.88824	0.00398778	0.108041	0.474499
rs10122014	11735597_a_at	PTCH1	-2.87381	0.00417246	0.11237	-0.0917545
rs4146138	11735597_a_at	PTCH1	-2.87381	0.00417246	0.11237	-0.0917545
rs112852416	11731293_at	SLITRK1	-2.87117	0.00420697	0.112962	-0.0834371
rs9603820	11716809_a_at	CDC16	-2.85927	0.00436626	0.116891	-0.135228
rs115619982	11739796_a_at	RHBDF2	-2.85009	0.00449294	0.119833	-0.670727
rs193222145	11757512_a_at	ADI1	-2.84939	0.0045027	0.119833	-0.441881
rs188187201	11727600_a_at	TNFRSF4	2.84677	0.00453945	0.120365	0.248694
rs12664332	11725734_a_at	NFYA	2.84607	0.00454937	0.120365	0.363006
rs57827007	11726874_a_at	IFT140	-2.84291	0.00459423	0.121196	-0.844175
rs117718271	11715623_s_at	RNF114	2.84125	0.00461795	0.121406	0.0785741
rs57827007	11735040_at	RPL3L	-2.84047	0.0046291	0.121406	-0.833969
rs61897943	11740872_a_at	MS4A7	2.83701	0.00467897	0.122156	0.146203
rs61897948	11732866_x_at	MS4A4A	2.83661	0.00468478	0.122156	0.122504
rs77108619	11720447_s_at	SOX9	-2.83237	0.00474675	0.123416	-0.22199
rs573790	11723849_a_at	MS4A6A	-2.83019	0.0047788	0.123892	-0.0537699
rs2070970	11760710_a_at	MS4A6A	2.82526	0.00485213	0.125432	0.0702356
rs114450321	11728127_at	UCMA	2.82372	0.00487531	0.125672	0.411696
rs114450321	11731492_at	PRPF18	-2.82175	0.00490493	0.126075	-0.699935
rs201421746	11756403_s_at	KCTD10	2.80603	0.00514813	0.13195	0.564051
rs2814778	11723212_at	KCNJ10	-2.80324	0.00519235	0.132706	-0.0519766
rs573790	11734190_at	OOSP2	2.79832	0.00527118	0.134341	0.0201232
rs12664332	11724363_a_at	FOXP4	-2.78858	0.00543067	0.138015	-0.329621
rs2847666	11760710_a_at	MS4A6A	2.78205	0.00553991	0.140396	0.0693748
rs56157839	11732866_x_at	MS4A4A	2.77953	0.00558274	0.141085	0.119563
rs528823	11760710_a_at	MS4A6A	2.77292	0.00569614	0.143549	0.0809656
rs2814778	11739754_at	SLAMF8	2.75719	0.00597456	0.150146	0.183523
rs188187201	11715618_a_at	SDF4	2.75567	0.00600213	0.15042	0.203701
rs76465000	11744907_a_at	INTS13	2.75175	0.00607367	0.151791	1.12437
rs72810671	11748024_a_at	CLK4	2.74759	0.00615039	0.153284	0.14301
rs78809000	11739168_a_at	GIMAP6	2.74618	0.00617667	0.153515	0.137156
rs61897945	11740872_a_at	MS4A7	2.74462	0.00620571	0.153813	0.140027
rs11570112	11752494_a_at	AMBRA1	-2.74315	0.00623328	0.154073	-0.407402
rs558788	11760710_a_at	MS4A6A	2.7382	0.00632702	0.155963	0.0805796
rs2583476	11760710_a_at	MS4A6A	2.73672	0.00635515	0.156229	0.0681955
rs183626006	11725747_a_at	ATP2C1	-2.72844	0.00651528	0.159731	-0.147121
rs76406842	11745827_a_at	SUPT20H	2.72459	0.00659102	0.160985	0.816392
rs1582763	11728750_a_at	OSBP	-2.72402	0.00660215	0.160985	-0.0530047
rs9984933	11760494_at	LINC01549	-2.72014	0.00667949	0.162432	-0.402373
rs7528331	11734349_a_at	TRIM11	2.7192	0.00669824	0.16245	0.0860942
rs554311	11760710_a_at	MS4A6A	2.71615	0.00675971	0.163502	0.0801886
rs57827007	11737678_a_at	C1QTNF8	-2.70709	0.00694499	0.16639	-0.431258
rs9839996	11755876_a_at	IFRD2	-2.7066	0.00695511	0.16639	-1.19826
rs76089552	11755876_a_at	IFRD2	-2.7066	0.00695511	0.16639	-1.19826
rs1495986	11757924_s_at	SIPA1L2	2.70606	0.00696635	0.16639	0.105421
rs11150819	11761269_x_at	TMC6	-2.70582	0.00697136	0.16639	-0.0502551
rs201877628	11725058_a_at	NEDD9	2.70138	0.00706416	0.168161	1.37669
rs1151065	11760710_a_at	MS4A6A	2.69937	0.0071066	0.168726	0.079413
rs75540417	11728548_a_at	ZNF536	-2.69776	0.00714056	0.168783	-0.218884
rs2847655	11760710_a_at	MS4A6A	2.69735	0.00714929	0.168783	0.067456
rs61744238	11734126_a_at	NOD1	-2.69661	0.00716514	0.168783	-0.79168
rs75135281	11747937_a_at	DNAJB6	2.69084	0.00728894	0.171252	0.652676
rs1151065	11737424_at	MS4A2	-2.68715	0.00736919	0.172688	-0.156261
rs9496715	11758787_at	FUCA2	-2.67884	0.00755265	0.176072	-0.0259992
rs7741506	11758787_at	FUCA2	-2.67884	0.00755265	0.176072	-0.0259992
rs61897948	11732865_a_at	MS4A4A	2.67797	0.00757216	0.176072	0.120463
rs114450321	11746511_s_at	SEPHS1	-2.67501	0.00763869	0.177163	-0.719289
rs11150818	11761269_x_at	TMC6	-2.6732	0.00767959	0.177655	-0.0490782
rs183626006	11761205_a_at	NUDT16	-2.6693	0.00776853	0.179252	-0.215322
rs6591559	11740871_a_at	MS4A7	2.66465	0.00787563	0.18126	0.0947569
rs549680	11728750_a_at	OSBP	-2.6575	0.00804313	0.184644	-0.0559512
rs525794	11723912_at	MS4A8	-2.65592	0.00808056	0.185032	-0.0175778
rs75135281	11758121_s_at	RBM33	2.65262	0.00815903	0.186316	0.607223
rs7528331	11729480_a_at	GUK1	-2.65183	0.00817791	0.186316	-0.184644
rs2070970	11756780_a_at	MS4A7	2.64882	0.00825038	0.187494	0.0759221
rs201857791	11722729_a_at	METTL23	2.64423	0.00836216	0.189556	0.218296
rs78809000	11724734_at	ABCB8	2.63572	0.00857277	0.193843	0.120536
rs1441586	11723912_at	MS4A8	-2.63405	0.00861456	0.194301	-0.0172261
rs115754734	11724380_a_at	NHSL1	-2.63178	0.00867171	0.195103	-1.22392
rs72810671	11759932_at	CLK4	2.63054	0.00870309	0.195283	0.14683
rs11150819	11715922_x_at	2019-09-09	-2.62976	0.00872304	0.195283	-0.0317019
rs56157839	11732865_a_at	MS4A4A	2.62604	0.0088181	0.196779	0.117656
rs112402574	11731294_at	SLITRK1	-2.62544	0.00883346	0.196779	-0.0701756
rs77560710	11748604_a_at	DAPK2	2.61951	0.00898709	0.199671	0.234085
rs201857791	11744372_a_at	PRPSAP1	2.61872	0.00900753	0.199671	0.228695
rs9900782	11737122_at	ANKFN1	-2.61564	0.00908855	0.200973	-0.23041
rs554311	11737424_at	MS4A2	-2.61446	0.00911959	0.201027	-0.15262
rs11686262	11745136_a_at	AAK1	-2.61386	0.00913555	0.201027	-0.249532
rs4938933	11740871_a_at	MS4A7	2.61019	0.00923317	0.202681	0.0933914
rs558788	11728750_a_at	OSBP	-2.6068	0.00932434	0.204185	-0.0547222
rs12453	11756780_a_at	MS4A7	2.60166	0.00946384	0.206738	0.0785798
rs72810671	11729332_a_at	ZNF879	2.59853	0.00954987	0.208113	0.143794
rs114699955	11760711_at	TMEM14B	-2.59532	0.00963862	0.209143	-0.365778
rs11150818	11752638_x_at	TMC6	-2.59514	0.00964346	0.209143	-0.0329608
rs188187201	11763700_x_at	FAAP20	2.5931	0.0097005	0.209793	0.356036
rs2583476	11756780_a_at	MS4A7	2.5924	0.00971998	0.209793	0.0744708
rs6591559	11756780_a_at	MS4A7	2.58804	0.00984288	0.211939	0.0784343
rs543695	11747797_a_at	MS4A14	2.58595	0.00990199	0.212704	0.0670715
rs77001965	11720646_at	SPTLC2	-2.58479	0.00993511	0.212909	-0.811942
rs12664332	11751147_a_at	MOCS1	-2.5788	0.0101075	0.21609	-0.173326
rs1530914	11756780_a_at	MS4A7	2.57604	0.0101878	0.217291	0.0780187
rs117718271	11750095_a_at	RIPOR3	-2.57148	0.0103218	0.219315	-0.0905564
rs11150818	11715922_x_at	2019-09-09	-2.57116	0.0103313	0.219315	-0.0306416
rs1441586	11748962_a_at	PATL1	-2.56841	0.0104128	0.220526	-0.03787
rs2671272	11732135_a_at	COQ8A	2.56743	0.0104419	0.220625	0.0491758
rs684961	11723912_at	MS4A8	-2.56362	0.0105561	0.222516	-0.0169368
rs6752526	11730102_at	SCN9A	-2.55995	0.0106673	0.223398	-0.268321
rs502581	11748962_a_at	PATL1	-2.55954	0.0106798	0.223398	-0.0375701
rs16851571	11730102_at	SCN9A	-2.55927	0.0106881	0.223398	-0.268251
rs61897943	11740873_x_at	MS4A7	2.5587	0.0107054	0.223398	0.130233
rs549680	11737424_at	MS4A2	-2.55793	0.010729	0.223398	-0.149347
rs115619982	11719771_a_at	EXOC7	-2.55736	0.0107465	0.223398	-0.571391
rs9603820	11746106_a_at	CDC16	-2.55556	0.0108015	0.223772	-0.171268
rs75135281	11755224_a_at	RBM33	2.55471	0.0108277	0.223772	0.723596
rs9839996	11749014_a_at	SEMA3F	-2.55355	0.0108637	0.223772	-0.453859
rs76089552	11749014_a_at	SEMA3F	-2.55355	0.0108637	0.223772	-0.453859
rs528823	11728750_a_at	OSBP	-2.55046	0.0109596	0.225055	-0.0531396
rs1582763	11740871_a_at	MS4A7	2.54961	0.0109861	0.225055	0.0941546
rs73615423	11721785_a_at	ESR1	2.54914	0.0110008	0.225055	0.955149
rs61193515	11724274_s_at	PTPRK	-2.53804	0.0113526	0.23154	-0.16314
rs11150819	11752638_x_at	TMC6	-2.53753	0.0113691	0.23154	-0.0326144
rs202153656	11723912_at	MS4A8	-2.53589	0.0114219	0.23193	-0.0167361
rs11570112	11744457_x_at	MDK	-2.53459	0.0114639	0.23193	-0.745767
rs75265799	11733890_at	DNTT	2.53455	0.0114654	0.23193	0.240122
rs558788	11737424_at	MS4A2	-2.5323	0.0115385	0.232886	-0.147402
rs117019330	11739984_a_at	HAO1	2.52957	0.0116277	0.234164	0.143448
rs77001965	11720545_at	ANGEL1	2.52508	0.0117762	0.236224	0.682314
rs9900782	11740259_s_at	STXBP4	-2.52489	0.0117824	0.236224	-0.97799
rs74556234	11718627_at	TRAK1	2.52273	0.0118545	0.237142	0.553995
rs35733340	11744322_at	ABLIM2	-2.51912	0.0119757	0.238512	-0.195615
rs502581	11723912_at	MS4A8	-2.51911	0.0119758	0.238512	-0.0164067
rs188187201	11720684_at	B3GALT6	2.51597	0.0120823	0.240102	0.323643
rs115274671	11746112_x_at	MPHOSPH8	-2.51468	0.0121262	0.240445	-0.176115
rs115196503	11744322_at	ABLIM2	-2.51149	0.0122352	0.242075	-0.195026
rs528823	11737424_at	MS4A2	-2.50971	0.0122965	0.242755	-0.144978
rs75949790	11741698_a_at	LCN12	-2.50878	0.0123288	0.242861	-0.387798
rs9839996	11762378_a_at	DCAF1	-2.5067	0.0124008	0.2429	-0.7717
rs76089552	11762378_a_at	DCAF1	-2.5067	0.0124008	0.2429	-0.7717
rs543695	11737424_at	MS4A2	-2.50639	0.0124115	0.2429	-0.136074
rs543695	11738730_at	OR5A1	-2.50521	0.0124529	0.243183	-0.0278978
rs1530914	11740871_a_at	MS4A7	2.50385	0.0125004	0.243207	0.0890254
rs6591559	11728750_a_at	OSBP	-2.50363	0.0125081	0.243207	-0.0469665
rs75990347	11728485_x_at	LIMD1	-2.50284	0.0125357	0.24322	-0.590549
rs4938933	11756780_a_at	MS4A7	2.49689	0.0127462	0.246774	0.0761466
rs9900782	11726787_s_at	TMEM100	-2.49588	0.0127824	0.246945	-0.248613
rs115619982	11721760_a_at	TSEN54	2.49318	0.0128792	0.248282	0.741477
rs583296	11723912_at	MS4A8	-2.49016	0.012988	0.24984	-0.0164228
rs1582763	11716736_at	PRPF19	-2.48941	0.0130154	0.24984	-0.0436782
rs75265799	11749118_a_at	SORBS1	-2.48597	0.0131408	0.251712	-0.224132
rs11230228	11716846_a_at	MS4A6A	-2.48517	0.01317	0.251737	-0.0330624
rs1151065	11728750_a_at	OSBP	-2.47931	0.0133866	0.255271	-0.0520456
rs57827007	11761014_at	PKMYT1	-2.47864	0.0134115	0.255271	-0.524258
rs61744238	11756913_s_at	NOD1	-2.47698	0.0134737	0.255361	-0.735
rs6591559	11740873_x_at	MS4A7	2.47653	0.0134904	0.255361	0.0681355
rs117718271	11726969_x_at	BCAS4	2.47619	0.013503	0.255361	0.151811
rs611267	11740871_a_at	MS4A7	2.47549	0.0135294	0.255361	0.0874384
rs76089552	11738224_a_at	IQCF1	-2.47287	0.0136281	0.256685	-0.523102
rs611267	11728750_a_at	OSBP	-2.47206	0.0136587	0.256727	-0.0460373
rs114106603	11721365_a_at	IREB2	-2.47096	0.0137007	0.25698	-0.472131
rs79345033	11719876_at	CKMT2	-2.46799	0.0138137	0.258564	-0.213601
rs4938933	11740873_x_at	MS4A7	2.46648	0.0138715	0.259022	0.0682656
rs1530914	11740873_x_at	MS4A7	2.46538	0.013914	0.259022	0.0677831
rs73214651	11722117_a_at	LZTS1	-2.46473	0.013939	0.259022	-0.132997
rs3799468	11745968_x_at	BCLAF1	-2.46436	0.0139531	0.259022	-0.755929
rs2847655	11756780_a_at	MS4A7	2.45535	0.0143049	0.264526	0.0708101
rs12664332	11724617_a_at	MOCS1	-2.45468	0.0143316	0.264526	-0.161046
rs61897945	11740873_x_at	MS4A7	2.45428	0.0143472	0.264526	0.123669
rs114450321	11723478_s_at	CDC123	2.45314	0.0143926	0.264526	0.450852
rs1582763	11755858_a_at	MS4A1	2.45305	0.0143962	0.264526	0.112563
rs667897	11723912_at	MS4A8	-2.45079	0.0144861	0.265638	-0.0161208
rs11686262	11736633_at	AAK1	-2.44916	0.014551	0.266286	-0.236951
rs57827007	11740660_a_at	IGFALS	-2.44722	0.014629	0.267171	-0.658391
rs188187201	11763379_a_at	FAAP20	-2.44539	0.014703	0.26798	-0.199185
rs573790	11728750_a_at	OSBP	2.44269	0.0148126	0.269434	0.045241
rs667897	11756681_a_at	CCDC86	-2.44159	0.0148571	0.269699	-0.0372113
rs75990347	11722866_at	CDCP1	2.4385	0.0149839	0.27104	0.355239
rs201857791	11753430_x_at	WBP2	-2.43781	0.0150122	0.27104	-0.374827
rs202153656	11756780_a_at	MS4A7	2.43688	0.0150507	0.27104	0.071416
rs1582763	11756681_a_at	CCDC86	-2.43687	0.0150511	0.27104	-0.0400337
rs75135281	11760633_at	RNF32	2.43196	0.0152547	0.274159	0.452169
rs75265799	11727471_a_at	CYP2C9	2.43114	0.0152891	0.274232	0.199594
rs201421746	11754301_a_at	ATP2A2	-2.43	0.015337	0.274544	-0.329148
rs78825267	11735859_at	TAS2R7	2.42862	0.015395	0.275037	0.0350915
rs117331810	11718536_s_at	NKTR	2.42629	0.0154933	0.276245	1.06237
rs12340865	11720414_a_at	CAMSAP1	2.42408	0.015587	0.276943	0.966022
rs74395607	11749072_x_at	FAM172A	-2.42393	0.0155938	0.276943	-0.409799
rs183626006	11752072_a_at	ATP2C1	-2.422	0.015676	0.277153	-0.210634
rs2814778	11742533_at	OR10J3	-2.42166	0.0156907	0.277153	-0.0364471
rs201501145	11746269_a_at	ABHD3	-2.421	0.0157189	0.277153	-0.264165
rs76406842	11733479_a_at	SUPT20H	2.41889	0.0158097	0.277153	0.546091
rs2671272	11720289_a_at	CDC42BPA	-2.41875	0.0158155	0.277153	-0.0996227
rs1530914	11728750_a_at	OSBP	-2.41864	0.0158204	0.277153	-0.0453527
rs9839996	11716008_x_at	RBM5	2.41808	0.0158443	0.277153	0.386033
rs11230228	11730569_at	MS4A5	-2.41792	0.0158513	0.277153	-0.0245032
rs75949790	11759224_at	EDF1	2.41709	0.0158872	0.277242	0.513951
rs11824734	11740872_a_at	MS4A7	2.41548	0.0159572	0.277407	0.0696939
rs114182264	11758207_s_at	PKN2	2.41546	0.0159582	0.277407	0.586148
rs7926354	11740873_x_at	MS4A7	2.4143	0.0160085	0.277748	0.0659389
rs7929589	11740873_x_at	MS4A7	2.4095	0.016219	0.280626	0.0661202
rs11230228	11742360_at	OR5A2	-2.40909	0.0162372	0.280626	-0.0209072
rs11824734	11756780_a_at	MS4A7	2.40839	0.0162677	0.280626	0.0755557
rs6752526	11717955_a_at	STK39	2.40471	0.0164314	0.282909	0.377675
rs16851571	11717955_a_at	STK39	2.40113	0.0165916	0.285123	0.377119
rs7926354	11756780_a_at	MS4A7	2.39927	0.0166756	0.286022	0.072214
rs76228983	11746536_a_at	WSB2	2.39803	0.0167318	0.286155	0.370866
rs16996942	11723434_a_at	TBC1D22A	-2.39769	0.0167468	0.286155	-0.384571
rs583296	11756780_a_at	MS4A7	2.39589	0.0168287	0.28661	0.0701643
rs7929589	11728750_a_at	OSBP	-2.39571	0.016837	0.28661	-0.0448321
rs16996942	11726154_s_at	FAM19A5	-2.39083	0.0170606	0.289869	-0.20134
rs76841445	11723501_at	PRLR	-2.3893	0.0171315	0.290527	-0.471886
rs667897	11716736_at	PRPF19	-2.38693	0.0172414	0.291842	-0.0388659
rs113105473	11731294_at	SLITRK1	-2.38111	0.0175141	0.295656	-0.0758334
rs117939676	11736614_at	AVPR1A	2.38072	0.0175322	0.295656	0.0698228
rs12453	11740871_a_at	MS4A7	2.37945	0.0175924	0.296116	0.0844138
rs502581	11756780_a_at	MS4A7	2.37823	0.0176505	0.296541	0.0687892
rs78809000	11739721_at	GIMAP8	2.37703	0.0177073	0.296636	0.152244
rs611267	11740872_a_at	MS4A7	2.37672	0.0177219	0.296636	0.0658066
rs118186656	11729849_a_at	MLLT10	-2.37378	0.0178626	0.298437	-0.640292
rs57827007	11761373_at	PKMYT1	2.37134	0.0179803	0.299849	0.751921
rs115515568	11723768_a_at	SNX24	-2.36988	0.018051	0.300024	-0.724597
rs77276680	11757444_a_at	EGLN3	-2.36889	0.0180986	0.300024	-0.133323
rs611267	11740873_x_at	MS4A7	2.36881	0.0181026	0.300024	0.0647142
rs554311	11728750_a_at	OSBP	-2.36837	0.0181238	0.300024	-0.0499135
rs1582763	11740873_x_at	MS4A7	2.36612	0.0182336	0.300851	0.0675999
rs1530914	11716736_at	PRPF19	-2.36598	0.0182405	0.300851	-0.0399784
rs76713772	11756794_a_at	ASZ1	-2.36443	0.0183163	0.301212	-0.387202
rs57827007	11719181_a_at	CLCN7	-2.36344	0.0183651	0.301212	-0.550571
rs189740529	11721793_at	RGMB	-2.36285	0.0183944	0.301212	-1.48899
rs201857791	11743339_s_at	MFSD11	2.36281	0.0183959	0.301212	0.250136
rs201877628	11730640_at	GCM2	-2.36064	0.0185031	0.301842	-0.293475
rs610932	11723912_at	MS4A8	-2.36026	0.0185218	0.301842	-0.0160419
rs7929589	11756780_a_at	MS4A7	2.36001	0.0185347	0.301842	0.0713774
rs11686262	11761845_at	ANXA4	2.35919	0.018575	0.301952	0.221168
rs11150819	11759846_x_at	C17orf99	-2.35536	0.018766	0.304509	-0.0534654
rs57827007	11731941_at	PRSS33	2.35309	0.0188801	0.305665	2.42394
rs78493864	11727387_s_at	NPY1R	-2.35164	0.0189537	0.305665	-0.0540133
rs7528331	11729481_s_at	GUK1	-2.35085	0.0189935	0.305665	-0.121919
rs558788	11740871_a_at	MS4A7	2.35077	0.0189974	0.305665	0.0936772
rs6591559	11716736_at	PRPF19	-2.35059	0.0190067	0.305665	-0.0397484
rs11230229	11738939_a_at	MS4A13	-2.3483	0.0191228	0.306481	-0.0153855
rs9900782	11759657_at	TOM1L1	-2.34825	0.0191253	0.306481	-0.338859
rs9603820	11749875_a_at	LAMP1	2.34526	0.0192785	0.308079	0.159552
rs12669698	11743221_at	GPR141	2.34497	0.0192934	0.308079	0.0736708
rs543695	11740871_a_at	MS4A7	2.34326	0.0193813	0.308936	0.0870874
rs7926344	11728750_a_at	OSBP	-2.34101	0.0194977	0.310243	-0.043718
rs10792263	11756780_a_at	MS4A7	2.33781	0.0196643	0.312169	0.0721883
rs554311	11728067_at	PTGDR2	-2.33735	0.0196879	0.312169	-0.0899087
rs3799468	11748597_s_at	BCLAF1	-2.33472	0.019826	0.313475	-0.514589
rs75949790	11719762_a_at	GPSM1	2.33392	0.0198684	0.313475	0.375056
rs41324748	11716384_at	CCL2	-2.3338	0.0198745	0.313475	-0.304929
rs7528331	11756553_a_at	GUK1	-2.33282	0.0199264	0.313746	-0.195366
rs9496715	11743394_a_at	AIG1	-2.3306	0.0200436	0.314492	-0.0415405
rs7741506	11743394_a_at	AIG1	-2.3306	0.0200436	0.314492	-0.0415405
rs11824734	11719313_a_at	FAM111A	2.32799	0.0201828	0.315535	0.051727
rs41314286	11720287_a_at	CDC42BPA	-2.32752	0.0202079	0.315535	-0.0787843
rs9603820	11752001_a_at	CUL4A	-2.32739	0.020215	0.315535	-0.208604
rs2854450	11732135_a_at	COQ8A	2.32556	0.0203128	0.316515	0.0453281
rs2847666	11756780_a_at	MS4A7	2.3244	0.0203753	0.316942	0.0668905
rs7926344	11756780_a_at	MS4A7	2.32315	0.0204426	0.31744	0.0701137
rs72810671	11750316_at	AACSP1	-2.32046	0.0205885	0.319157	-0.0418953
rs116862617	11761615_x_at	TTC16	-2.31888	0.0206744	0.31994	-0.132252
rs75411903	11747673_a_at	SACM1L	-2.31787	0.0207296	0.320244	-0.505731
rs11150818	11759846_x_at	C17orf99	-2.31671	0.0207931	0.320258	-0.0519833
rs117285160	11755224_a_at	RBM33	-2.31656	0.0208015	0.320258	-0.233273
rs9603820	11759835_at	PCID2	2.31517	0.0208777	0.320884	0.18946
rs202153656	11748962_a_at	PATL1	-2.31087	0.0211155	0.323987	-0.0344023
rs73596299	11735859_at	TAS2R7	2.30991	0.0211689	0.324116	0.0322299
rs55846997	11737814_a_at	GYG1	2.30943	0.0211958	0.324116	0.0732491
rs7926344	11740871_a_at	MS4A7	2.30577	0.0214007	0.326696	0.0816802
rs201857791	11717753_a_at	SEC14L1	-2.30303	0.0215553	0.328416	-0.305972
rs7232	11740871_a_at	MS4A7	2.30237	0.0215923	0.328416	0.0818635
rs79102899	11758607_s_at	VWA8	2.30184	0.0216226	0.328416	0.347023
rs115619982	11718495_a_at	SRP68	2.29932	0.021766	0.330039	0.335201
rs10792263	11719313_a_at	FAM111A	2.29778	0.0218537	0.330166	0.0502467
rs11230228	11732866_x_at	MS4A4A	-2.29774	0.0218565	0.330166	-0.0898901
rs549680	11760710_a_at	MS4A6A	2.29725	0.0218842	0.330166	0.0679168
rs73214651	11752667_a_at	LZTS1	-2.29446	0.0220446	0.33203	-0.114756
rs9496715	11717740_a_at	FUCA2	2.29247	0.0221597	0.332654	0.0353045
rs7741506	11717740_a_at	FUCA2	2.29247	0.0221597	0.332654	0.0353045
rs2854450	11751911_a_at	CDC42BPA	-2.29024	0.0222896	0.334048	-0.0265261
rs78493864	11742281_at	NAF1	2.28913	0.0223544	0.334374	0.0639037
rs10792263	11740872_a_at	MS4A7	2.28815	0.0224115	0.334374	0.0649938
rs75949790	11756461_a_at	LCN8	-2.28768	0.0224392	0.334374	-0.469849
rs78809000	11719437_a_at	ZNF746	-2.28733	0.0224596	0.334374	-0.139804
rs115619982	11724977_a_at	ITGB4	-2.2849	0.0226021	0.335721	-0.346189
rs76713772	11716408_a_at	MET	2.28367	0.0226749	0.335721	0.376574
rs11570112	11749347_x_at	C11orf49	2.28359	0.0226796	0.335721	0.737223
rs113239743	11731257_a_at	TRIM67	-2.28327	0.0226989	0.335721	-0.242451
rs11570112	11731835_a_at	RAPSN	2.28036	0.0228714	0.337077	0.476834
rs61897943	11740871_a_at	MS4A7	2.28035	0.0228718	0.337077	0.150252
rs528823	11740871_a_at	MS4A7	2.27882	0.0229633	0.337077	0.0901343
rs75135281	11718311_a_at	RBM33	-2.2782	0.0230006	0.337077	-0.587815
rs684961	11748962_a_at	PATL1	-2.27803	0.0230106	0.337077	-0.0339555
rs61897945	11755422_s_at	CD6	-2.27771	0.0230297	0.337077	-0.0904212
rs12453	11740873_x_at	MS4A7	2.27734	0.0230521	0.337077	0.0624856
rs1582763	11728269_a_at	MS4A1	2.27661	0.023096	0.337171	0.0971372
rs188187201	11755023_a_at	RER1	2.27496	0.0231949	0.338068	0.16638
rs201877628	11730320_a_at	NEDD9	2.27412	0.023246	0.338266	0.672284
rs57827007	11763891_x_at	SNORA78	-2.27079	0.0234481	0.340658	-0.557396
rs77560710	11725237_a_at	RBPMS2	-2.26781	0.0236301	0.342029	-0.440051
rs75422372	11717353_at	EAPP	2.26771	0.0236361	0.342029	0.184687
rs115619982	11724064_a_at	SLC25A19	2.26738	0.0236562	0.342029	0.508168
rs7232	11740873_x_at	MS4A7	2.26648	0.0237113	0.342278	0.0623148
rs78229408	11749867_x_at	DHFR	2.26503	0.0238006	0.343018	0.269479
rs75949790	11735307_at	C9orf139	2.26415	0.0238553	0.343257	0.439168
rs11230160	11748962_a_at	PATL1	-2.26121	0.0240375	0.344779	-0.0336004
rs920573	11748962_a_at	PATL1	-2.26121	0.0240375	0.344779	-0.0336004
rs667897	11751363_a_at	CCDC86	-2.25953	0.024142	0.345729	-0.0268913
rs115865161	11760345_a_at	HES1	2.25891	0.0241806	0.345733	0.177902
rs79225353	11719104_s_at	CPNE3	2.25789	0.0242444	0.346097	0.61255
rs35733340	11749865_a_at	ABLIM2	-2.25719	0.0242889	0.346184	-0.127244
rs76713772	11752248_a_at	MET	-2.25473	0.0244433	0.347671	-0.325129
rs7528331	11758356_s_at	HIST3H2A	-2.25404	0.0244873	0.347671	-0.0996489
rs1151065	11740871_a_at	MS4A7	2.25369	0.0245089	0.347671	0.0897961
rs75990347	11756203_x_at	KIAA1143	-2.25158	0.0246428	0.349022	-0.461604
rs1582763	11740872_a_at	MS4A7	2.25029	0.0247249	0.349637	0.0651834
rs115196503	11749865_a_at	ABLIM2	-2.24869	0.0248275	0.350538	-0.126767
rs116862617	11724081_a_at	TOR2A	-2.24452	0.0250955	0.353542	-0.181989
rs6591559	11740872_a_at	MS4A7	2.24416	0.0251186	0.353542	0.0626235
rs115274671	11763450_s_at	MPHOSPH8	2.24337	0.0251697	0.353708	0.121921
rs75949790	11763802_x_at	KCNT1	2.2421	0.0252521	0.353877	0.299792
rs4938933	11740872_a_at	MS4A7	2.24198	0.0252601	0.353877	0.0629358
rs73596299	11721393_at	NINJ2	2.24071	0.0253427	0.354483	0.0861634
rs117124040	11736897_x_at	PRRG4	-2.23945	0.0254247	0.355079	-0.633102
rs201877628	11752749_a_at	SYCP2L	-2.23378	0.0257974	0.358835	-0.422758
rs115080214	11750148_a_at	SNED1	-2.23348	0.0258169	0.358835	-0.288086
rs117331810	11718535_at	NKTR	2.23336	0.0258253	0.358835	1.11466
rs61193515	11737579_at	HLA-L	2.23294	0.0258526	0.358835	0.0396337
rs11824734	11740873_x_at	MS4A7	2.23215	0.0259055	0.359016	0.0635815
rs75135281	11716330_a_at	DNAJB6	2.23103	0.0259798	0.359493	1.10624
rs61897948	11738730_at	OR5A1	-2.22977	0.0260635	0.359726	-0.0285408
rs76406842	11760133_x_at	SUPT20H	2.22924	0.0260993	0.359726	0.817639
rs112259525	11731294_at	SLITRK1	-2.2284	0.0261554	0.359726	-0.0710053
rs7929589	11716736_at	PRPF19	-2.22839	0.0261561	0.359726	-0.0375906
rs1530914	11740872_a_at	MS4A7	2.22684	0.0262595	0.360435	0.0620996
rs11230160	11740871_a_at	MS4A7	2.22549	0.0263504	0.360435	0.076446
rs920573	11740871_a_at	MS4A7	2.22549	0.0263504	0.360435	0.076446
rs11230228	11732865_a_at	MS4A4A	-2.22524	0.0263674	0.360435	-0.0906421
rs549680	11738939_a_at	MS4A13	2.2244	0.0264241	0.360663	0.0169926
rs185302072	11759736_a_at	BIRC5	-2.21884	0.0268019	0.365267	-0.419657
rs9900782	11743143_at	COX11	2.21726	0.0269103	0.366063	1.18232
rs7926354	11740872_a_at	MS4A7	2.2168	0.0269414	0.366063	0.0614015
rs10666077	11740634_a_at	FOXP2	-2.21433	0.027112	0.367476	-0.14132
rs502581	11737424_at	MS4A2	-2.21407	0.0271297	0.367476	-0.109914
rs7232	11756681_a_at	CCDC86	-2.21352	0.0271677	0.367476	-0.0350088
rs11150819	11719218_at	SOCS3	2.21217	0.027261	0.367686	0.0740126
rs16917282	11752950_a_at	OPRK1	2.21212	0.0272647	0.367686	0.019417
rs115156754	11752665_a_at	C1orf112	2.21017	0.0274002	0.368962	0.184419
rs583296	11748962_a_at	PATL1	-2.20762	0.0275786	0.370811	-0.0328475
rs115156754	11755826_a_at	SELP	-2.20568	0.0277148	0.372088	-0.594226
rs12340865	11721176_at	PPP1R26	2.20282	0.0279167	0.374241	0.922872
rs201857791	11753429_a_at	WBP2	-2.20032	0.028094	0.376059	-0.354779
rs72810671	11761108_x_at	PDLIM7	-2.19821	0.0282446	0.377515	-0.0985324
rs2671272	11747732_a_at	COQ8A	2.19559	0.0284327	0.379083	0.0492364
rs1441586	11737424_at	MS4A2	-2.19541	0.0284459	0.379083	-0.109488
rs72810671	11718338_a_at	NHP2	2.19429	0.0285263	0.379594	0.0505025
rs4938933	11728750_a_at	OSBP	-2.19336	0.0285936	0.379711	-0.0414319
rs10792263	11740873_x_at	MS4A7	2.193	0.0286193	0.379711	0.0614779
rs7929589	11740871_a_at	MS4A7	2.19188	0.0287009	0.380235	0.0778468
rs7926344	11740873_x_at	MS4A7	2.19052	0.0287995	0.380981	0.0600174
rs17704885	11744315_at	PRAG1	2.18825	0.0289651	0.382259	0.0877065
rs114241756	11761205_a_at	NUDT16	-2.18803	0.0289809	0.382259	-0.176778
rs116087048	11761571_at	STK11IP	-2.18632	0.0291067	0.382945	-0.411102
rs56157839	11738730_at	OR5A1	-2.18617	0.0291177	0.382945	-0.0278695
rs201421746	11719591_s_at	GLTP	2.18436	0.0292503	0.384127	0.357714
rs61897948	11738939_a_at	MS4A13	2.18374	0.0292964	0.384127	0.0178131
rs76713772	11722757_at	CFTR	2.18219	0.0294114	0.384127	0.327915
rs7926354	11728750_a_at	OSBP	-2.18118	0.0294861	0.384127	-0.0406521
rs117331810	11751028_a_at	VIPR1	2.18101	0.0294987	0.384127	0.383323
rs723714	11717301_at	TACSTD2	-2.18099	0.0295	0.384127	-0.22528
rs7528331	200075_PM_s_at	GUK1	-2.18091	0.0295057	0.384127	-0.151505
rs11777327	11744315_at	PRAG1	2.17939	0.029619	0.385002	0.0869664
rs75949790	11746007_a_at	SEC16A	-2.17887	0.0296582	0.385002	-0.48873
rs4938933	11716736_at	PRPF19	-2.17829	0.029701	0.385004	-0.0370738
rs76815609	11759817_at	MCPH1	2.17745	0.0297638	0.385033	0.23213
rs10487776	11746197_a_at	HUS1	2.17712	0.0297886	0.385033	0.255776
rs61193515	11749088_s_at	PTPRK	-2.17572	0.0298935	0.385333	-0.138727
rs11150818	11718127_at	TK1	-2.17548	0.0299118	0.385333	-0.0548877
rs138017690	11761489_x_at	SDF4	-2.1751	0.02994	0.385333	-0.220238
rs6591559	11738730_at	OR5A1	-2.17286	0.0301095	0.386819	-0.0232017
rs1582763	11756780_a_at	MS4A7	2.17244	0.0301412	0.386819	0.068436
rs72810671	11761180_at	TMED9	-2.17162	0.0302033	0.387065	-0.0453625
rs9839996	11749743_a_at	MST1R	2.17091	0.0302568	0.387202	0.505506
rs115080214	11749163_a_at	FARP2	2.16872	0.0304237	0.388785	0.229672
rs549680	11740871_a_at	MS4A7	2.16646	0.0305964	0.390429	0.0866516
rs11150818	11715921_a_at	2019-09-09	-2.16591	0.0306389	0.390429	-0.02768
rs59224344	11738730_at	OR5A1	-2.16527	0.0306876	0.390498	-0.0287824
rs12453	11740872_a_at	MS4A7	2.16443	0.0307524	0.390772	0.0602109
rs75949790	11731854_at	C8G	2.16217	0.0309267	0.391584	0.284436
rs2070970	11740871_a_at	MS4A7	2.1617	0.0309627	0.391584	0.0728366
rs9839996	11743131_a_at	APEH	-2.16075	0.0310366	0.391584	-0.486232
rs610932	11740871_a_at	MS4A7	2.16017	0.0310819	0.391584	0.076541
rs61744238	11736771_a_at	SCRN1	-2.16007	0.0310898	0.391584	-0.398163
rs2814778	11742366_at	OR10R2	-2.15998	0.0310965	0.391584	-0.0310381
rs77560710	11740042_at	MTFMT	-2.15967	0.0311201	0.391584	-0.186767
rs2583476	11740871_a_at	MS4A7	2.15891	0.0311797	0.391615	0.072891
rs193222145	11757564_x_at	ADI1	-2.15799	0.0312512	0.391615	-0.337478
rs56157839	11755858_a_at	MS4A1	2.15793	0.0312563	0.391615	0.113993
rs114106603	11742733_x_at	MORF4L1	-2.15699	0.0313297	0.391615	-0.187176
rs75265799	11745485_a_at	OPALIN	-2.15686	0.0313396	0.391615	-0.172141
rs57827007	11724418_a_at	UNKL	-2.15342	0.0316097	0.393928	-0.86767
rs113239743	11731560_at	FAM89A	-2.15247	0.0316849	0.393928	-0.291476
rs74861994	11736633_at	AAK1	-2.15207	0.0317161	0.393928	-0.190504
rs117331810	11723705_at	ABHD5	2.15148	0.0317632	0.393928	0.955459
rs1495986	11733275_a_at	PCNX2	-2.15092	0.0318078	0.393928	-0.0388256
rs185302072	11744293_a_at	CYTH1	-2.1504	0.0318487	0.393928	-0.470362
rs525794	11748962_a_at	PATL1	-2.15014	0.0318695	0.393928	-0.0321289
rs2854450	11720289_a_at	CDC42BPA	-2.14944	0.0319246	0.393928	-0.0900937
rs573790	11751570_a_at	MS4A4A	-2.14902	0.0319582	0.393928	-0.0663973
rs57827007	11743993_at	KCTD5	-2.14898	0.0319614	0.393928	-0.531487
rs76465000	11721053_s_at	KLHL42	2.14821	0.0320229	0.394148	1.10767
rs72810671	11729703_a_at	DBN1	-2.14482	0.0322942	0.396688	-0.0787445
rs117285160	11760633_at	RNF32	-2.14414	0.0323484	0.396688	-0.141746
rs6591559	11756681_a_at	CCDC86	-2.14398	0.0323612	0.396688	-0.0339614
rs9496715	11717741_x_at	FUCA2	2.14166	0.0325485	0.397668	0.0336829
rs7741506	11717741_x_at	FUCA2	2.14166	0.0325485	0.397668	0.0336829
rs73198609	11731440_a_at	IFT57	2.14114	0.0325906	0.397668	0.131501
rs75743867	11742578_at	OR5H2	2.14081	0.0326174	0.397668	0.0637533
rs7926344	11716736_at	PRPF19	-2.13904	0.0327606	0.398619	-0.0360122
rs118186656	11741943_at	C10orf113	2.13876	0.0327838	0.398619	0.225534
rs1530914	11756681_a_at	CCDC86	-2.13619	0.0329936	0.39945	-0.0338147
rs11570112	11717397_a_at	DDB2	2.13591	0.0330162	0.39945	0.625922
rs1346159	11725274_s_at	RGS20	-2.13488	0.0331004	0.39945	-0.0197362
rs116055198	11745889_a_at	KIDINS220	-2.13488	0.0331008	0.39945	-0.368603
rs115619982	11726793_a_at	ITGB4	-2.13483	0.0331047	0.39945	-0.370084
rs117718271	11750214_a_at	RNF114	2.13412	0.0331628	0.39945	0.10181
rs1530914	11728002_at	MS4A6E	2.13365	0.0332014	0.39945	0.0166281
rs73198609	11735179_at	MORC1	-2.13079	0.0334374	0.39945	-0.0383492
rs201421746	11721899_x_at	FAM216A	2.13047	0.0334636	0.39945	0.450131
rs1441586	11740871_a_at	MS4A7	2.13034	0.0334743	0.39945	0.0727043
rs188187201	11745784_a_at	MRPL20-AS1	2.12976	0.0335228	0.39945	0.145005
rs76406842	11749527_a_at	POSTN	2.12973	0.0335254	0.39945	0.311148
rs76089552	11716304_a_at	ABHD14B	-2.12943	0.0335503	0.39945	-0.579821
rs113787062	11731294_at	SLITRK1	-2.12941	0.0335513	0.39945	-0.0692188
rs9839996	11718077_s_at	MAPKAPK3	-2.1293	0.0335605	0.39945	-0.434461
rs76089552	11718077_s_at	MAPKAPK3	-2.1293	0.0335605	0.39945	-0.434461
rs61897945	11740871_a_at	MS4A7	2.12785	0.0336809	0.400354	0.138816
rs502581	11740871_a_at	MS4A7	2.12619	0.0338201	0.400625	0.072236
rs9496715	11745821_a_at	PLAGL1	-2.12598	0.0338369	0.400625	-0.0279471
rs7741506	11745821_a_at	PLAGL1	-2.12598	0.0338369	0.400625	-0.0279471
rs10792263	11738730_at	OR5A1	-2.1253	0.0338944	0.400781	-0.0231063
rs11686262	11729572_a_at	CNRIP1	2.12448	0.0339627	0.401062	0.1684
rs117718271	11741784_x_at	BCAS4	2.12195	0.034175	0.401684	0.135503
rs76465000	11735496_at	SMCO2	-2.12192	0.034178	0.401684	-0.371064
rs684961	11756780_a_at	MS4A7	2.12167	0.0341993	0.401684	0.0623095
rs611267	11742360_at	OR5A2	-2.12138	0.0342233	0.401684	-0.0168728
rs11150818	11754251_a_at	USP36	-2.12121	0.0342379	0.401684	-0.0537285
rs12453	11728750_a_at	OSBP	-2.11779	0.0345272	0.404551	-0.0396432
rs11150818	11754110_x_at	BIRC5	-2.11676	0.0346152	0.405057	-0.0451487
rs11230228	11719313_a_at	FAM111A	-2.11425	0.0348292	0.406758	-0.0492578
rs7926354	11740871_a_at	MS4A7	2.114	0.0348508	0.406758	0.0747444
rs188187201	11747842_a_at	MXRA8	2.112	0.0350228	0.408237	0.120206
rs117331810	11749887_a_at	VIPR1	-2.11136	0.0350783	0.408357	-0.3649
rs11150819	11715921_a_at	2019-09-09	-2.11017	0.0351802	0.409015	-0.0272892
rs78809000	11741584_a_at	ASB10	-2.10945	0.0352426	0.409213	-0.0777808
rs11150818	11719218_at	SOCS3	2.10832	0.0353409	0.409827	0.0697393
rs56157839	11738939_a_at	MS4A13	2.10734	0.0354262	0.410196	0.0171219
rs11230228	11723849_a_at	MS4A6A	2.10691	0.0354636	0.410196	0.0440654
rs2070970	11748962_a_at	PATL1	-2.10633	0.0355139	0.410251	-0.0307094
rs76465000	11744221_a_at	INTS13	2.10483	0.0356448	0.411054	0.792342
rs78825267	11721393_at	NINJ2	2.10449	0.0356745	0.411054	0.0838691
rs583296	11740871_a_at	MS4A7	2.10292	0.0358117	0.412025	0.0723453
rs202153656	11740871_a_at	MS4A7	2.10204	0.0358893	0.412025	0.0723769
rs7929589	11740872_a_at	MS4A7	2.10188	0.035903	0.412025	0.0585134
rs11230228	11738730_at	OR5A1	2.10144	0.0359414	0.412025	0.0243299
rs4997596	11717301_at	TACSTD2	-2.10019	0.0360516	0.412624	-0.216142
rs181768270	11753504_x_at	ACTA1	-2.09981	0.0360852	0.412624	-0.266972
rs1441586	11756780_a_at	MS4A7	2.09697	0.0363369	0.414977	0.0609806
rs10792263	11756681_a_at	CCDC86	-2.09642	0.0363854	0.415006	-0.0338115
rs74861994	11735190_at	FBXO48	-2.09545	0.0364721	0.415097	-0.115901
rs12340865	11737669_a_at	KCNT1	-2.09488	0.0365232	0.415097	-0.464115
rs72824756	11761528_a_at	2019-09-10	-2.09478	0.0365315	0.415097	-0.146031
rs525794	11756780_a_at	MS4A7	2.09281	0.0367078	0.416575	0.0615966
rs74395607	11749071_a_at	FAM172A	2.09002	0.0369589	0.418899	0.315976
rs117493280	11748267_a_at	ZNF282	-2.08942	0.0370131	0.418987	-0.34805
rs573790	11715995_at	MRPL16	2.0884	0.0371048	0.419498	0.019734
rs76056273	11738873_a_at	KIF25	-2.0876	0.0371774	0.419792	-0.230495
rs78571577	11739252_x_at	HSD3B1	-2.08669	0.0372593	0.420192	-0.185301
rs610932	11716736_at	PRPF19	-2.08526	0.0373893	0.420787	-0.0351053
rs115754734	11726974_a_at	PERP	2.08497	0.0374163	0.420787	0.497697
rs201421746	11754322_a_at	KCTD10	2.08458	0.037452	0.420787	0.409725
rs610932	11728750_a_at	OSBP	-2.08375	0.0375273	0.42085	-0.0389361
rs79727142	11748549_a_at	ZDHHC17	-2.08349	0.0375509	0.42085	-0.224909
rs61897948	11746309_a_at	SLC15A3	-2.08256	0.0376362	0.421283	-0.0473719
rs554311	11738939_a_at	MS4A13	2.08187	0.0376993	0.421466	0.0159106
rs9603820	11735450_at	TMEM255B	2.0807	0.0378066	0.422143	0.0675678
rs2854450	11747732_a_at	COQ8A	2.07844	0.0380147	0.423176	0.0474089
rs6591559	11728002_at	MS4A6E	2.07821	0.0380363	0.423176	0.0162101
rs74861994	11758390_s_at	AAK1	-2.07817	0.0380399	0.423176	-0.214377
rs117019330	11730107_a_at	PLCB1	-2.07737	0.0381141	0.423187	-0.134495
rs7528331	11757299_x_at	GUK1	-2.07714	0.0381347	0.423187	-0.15142
rs610932	11756681_a_at	CCDC86	-2.07588	0.0382515	0.423962	-0.0327172
rs111408549	11741988_at	MBOAT4	-2.0743	0.0383981	0.424555	-0.0799991
rs17029268	11763420_at	LINC01102	2.07429	0.0383991	0.424555	0.0973487
rs11777327	11739395_a_at	MFHAS1	2.07331	0.038491	0.42505	0.0947398
rs1530914	11738730_at	OR5A1	-2.07179	0.0386326	0.426092	-0.0221133
rs55846997	11764015_at	LINC02032	-2.07099	0.0387076	0.426398	-0.0369789
rs113239743	11719065_x_at	GNPAT	2.0704	0.0387627	0.426484	0.324277
rs72810671	11727169_x_at	PDLIM7	-2.06775	0.0390123	0.428708	-0.110762
rs41314286	11737317_at	STUM	2.06595	0.0391823	0.430052	0.0837109
rs56157839	11733983_a_at	GIF	-2.06443	0.0393269	0.430268	-0.030917
rs61897948	11755858_a_at	MS4A1	2.06302	0.0394605	0.430268	0.109466
rs11230160	11730569_at	MS4A5	2.0629	0.0394722	0.430268	0.0186214
rs920573	11730569_at	MS4A5	2.0629	0.0394722	0.430268	0.0186214
rs76815609	11728245_a_at	ANGPT2	-2.06233	0.0395267	0.430268	-0.111193
rs11824734	11756681_a_at	CCDC86	-2.06204	0.0395542	0.430268	-0.033799
rs76056273	11719683_a_at	MPC1	-2.0618	0.039577	0.430268	-0.476868
rs74556234	11730598_at	CCDC13	-2.06075	0.039678	0.430268	-0.269878
rs115619982	11755705_a_at	SMIM5	-2.06047	0.0397048	0.430268	-1.11007
rs75135281	11738265_at	SHH	-2.05945	0.0398019	0.430268	-0.314199
rs202153656	11730569_at	MS4A5	2.05905	0.0398403	0.430268	0.0186243
rs11570112	11726805_s_at	PTPMT1	2.05814	0.0399283	0.430268	0.543022
rs72664686	11746759_at	HSD52	-2.05808	0.0399344	0.430268	-0.0291402
rs7926344	11740872_a_at	MS4A7	2.05769	0.0399716	0.430268	0.0571621
rs56157839	11747797_a_at	MS4A14	2.05736	0.0400036	0.430268	0.0611261
rs10489669	11750518_a_at	LINC01135	2.05717	0.0400221	0.430268	0.0290858
rs9812589	11731081_at	RBP2	2.05692	0.0400457	0.430268	0.0490845
rs3815868	11752950_a_at	OPRK1	2.05582	0.0401519	0.430268	0.017327
rs56157839	11746309_a_at	SLC15A3	-2.0558	0.0401541	0.430268	-0.0465716
rs114699955	11733746_x_at	GCNT2	-2.05493	0.0402384	0.430268	-0.330858
rs77560710	11734498_a_at	SNX22	2.05481	0.0402498	0.430268	0.24395
rs75949790	11748770_a_at	PMPCA	2.05452	0.040278	0.430268	0.40828
rs502581	11740873_x_at	MS4A7	2.0541	0.0403191	0.430268	0.0539682
rs11150819	11718127_at	TK1	-2.0535	0.0403774	0.430268	-0.0524374
rs79102899	11740718_a_at	ENOX1	-2.05332	0.0403942	0.430268	-0.091417
rs12340865	11744759_a_at	LCN12	-2.05105	0.040616	0.43212	-0.561201
rs75540417	11752425_s_at	URI1	-2.04873	0.0408424	0.43356	-0.423869
rs115600982	11737913_s_at	CCT7	-2.04828	0.0408872	0.43356	-0.211159
rs11150819	11747580_a_at	PGS1	-2.04792	0.0409225	0.43356	-0.0452668
rs114191746	11749631_a_at	APOB	-2.0475	0.0409635	0.43356	-0.126404
rs201877628	11725057_s_at	NEDD9	2.04721	0.0409917	0.43356	0.713924
rs554311	11740871_a_at	MS4A7	2.04602	0.0411095	0.433695	0.0818634
rs78229408	11719876_at	CKMT2	-2.04559	0.0411515	0.433695	-0.153627
rs75740589	11753610_a_at	VTCN1	2.04518	0.0411918	0.433695	0.14249
rs188187201	11734993_at	SKI	2.04513	0.0411967	0.433695	0.359829
rs558788	11728067_at	PTGDR2	-2.04423	0.0412867	0.434089	-0.0784545
rs117718271	11726968_a_at	BCAS4	2.04378	0.0413303	0.434089	0.137291
rs2814778	11731731_a_at	CD1B	2.04268	0.0414398	0.43421	0.0563248
rs76465000	11721052_at	KLHL42	2.04233	0.0414747	0.43421	1.10045
rs116862617	11723797_a_at	ZDHHC12	-2.04221	0.0414862	0.43421	-0.184977
rs9839996	11715550_at	DAG1	-2.04108	0.0415989	0.434884	-0.517741
rs667897	11742360_at	OR5A2	-2.03782	0.0419252	0.437617	-0.0157285
rs525794	11730569_at	MS4A5	2.03699	0.0420083	0.437617	0.0184857
rs11150819	11754251_a_at	USP36	-2.03629	0.0420786	0.437617	-0.0521964
rs11150818	11717753_a_at	SEC14L1	-2.03622	0.0420858	0.437617	-0.0460002
rs4938933	11748962_a_at	PATL1	-2.03488	0.0422209	0.437617	-0.0315557
rs76056273	11762545_at	TCP10	-2.03486	0.0422226	0.437617	-0.254044
rs72810671	11763489_a_at	NSD1	-2.03486	0.0422232	0.437617	-0.0905641
rs7232	11728750_a_at	OSBP	-2.03461	0.0422484	0.437617	-0.0381715
rs72666135	11750518_a_at	LINC01135	2.03294	0.0424172	0.438862	0.0287495
rs73615423	11727339_a_at	ZBTB2	2.03025	0.0426901	0.44118	0.789171
rs79345033	11737167_at	ANKRD34B	2.02832	0.0428868	0.442195	0.727282
rs1151065	11732452_a_at	MS4A3	-2.02791	0.0429294	0.442195	-0.163053
rs117548447	11737613_a_at	GAD2	-2.02738	0.0429833	0.442195	-0.049214
rs11570112	11723004_x_at	F2	-2.02737	0.0429844	0.442195	-0.342658
rs2671272	11741065_a_at	EPHX1	2.02689	0.0430336	0.442197	0.053093
rs115274671	11752025_s_at	ZMYM2	2.02524	0.0432032	0.443435	0.274715
rs188187201	11735653_a_at	PRXL2B	2.02402	0.0433292	0.444188	0.21751
rs4938933	11738730_at	OR5A1	-2.02357	0.0433751	0.444188	-0.0217456
rs61897943	11755422_s_at	CD6	-2.02196	0.0435423	0.44516	-0.0811675
rs115515568	11723770_s_at	SNX24	2.0217	0.043569	0.44516	0.505907
rs72810671	11748035_a_at	PDLIM7	-2.02123	0.043618	0.44516	-0.0892388
rs112852416	11731294_at	SLITRK1	-2.01906	0.0438426	0.44615	-0.060953
rs61744238	11750550_a_at	NOD1	-2.01769	0.0439856	0.44615	-0.395489
rs201008762	11744848_x_at	PRR16	2.01738	0.0440185	0.44615	0.226081
rs73596299	11731787_x_at	ERC1	2.01625	0.0441368	0.44615	0.114549
rs75949790	11735611_a_at	CCDC187	2.01616	0.0441458	0.44615	0.289304
rs72810671	11736723_a_at	PDLIM7	-2.01614	0.044148	0.44615	-0.112513
rs116862617	11743965_s_at	CERCAM	-2.01603	0.04416	0.44615	-0.236863
rs9839996	11715795_at	MANF	-2.01551	0.0442144	0.44615	-0.468655
rs76089552	11715795_at	MANF	-2.01551	0.0442144	0.44615	-0.468655
rs543695	11756803_a_at	MS4A14	2.01544	0.0442219	0.44615	0.0669769
rs138017690	11761488_at	SDF4	-2.01434	0.0443371	0.44615	-0.212633
rs115619982	11734365_a_at	GGA3	2.01402	0.044371	0.44615	0.376902
rs201421746	11731364_a_at	CCDC63	-2.01334	0.0444422	0.44615	-0.255052
rs2070970	11740873_x_at	MS4A7	2.01325	0.0444523	0.44615	0.0524697
rs61897945	11723849_a_at	MS4A6A	2.0132	0.0444568	0.44615	0.0711516
rs558788	11747797_a_at	MS4A14	2.0124	0.0445416	0.446505	0.0560665
rs2583476	11740873_x_at	MS4A7	2.01116	0.044673	0.447325	0.0525222
rs611267	11723912_at	MS4A8	-2.01015	0.04478	0.447501	-0.0136469
rs4938933	11756681_a_at	CCDC86	-2.01006	0.0447897	0.447501	-0.0320417
rs115619982	11754382_a_at	SMIM5	-2.00827	0.0449796	0.4489	-1.07259
rs11230160	11728002_at	MS4A6E	2.0068	0.0451367	0.449224	0.0151013
rs920573	11728002_at	MS4A6E	2.0068	0.0451367	0.449224	0.0151013
rs76089552	11727851_a_at	TEX264	-2.00656	0.0451614	0.449224	-0.624981
rs117331810	11721057_a_at	ANO10	-2.00522	0.0453056	0.449491	-0.591756
rs115080214	11742531_x_at	OR6B3	-2.00505	0.045323	0.449491	-0.134796
rs610932	11748962_a_at	PATL1	-2.00492	0.0453377	0.449491	-0.0307479
rs554311	11732452_a_at	MS4A3	-2.00368	0.0454707	0.450315	-0.161694
rs11150818	11747580_a_at	PGS1	-2.00312	0.0455301	0.450387	-0.0437676
rs115080214	11748707_a_at	NDUFA10	2.00268	0.0455779	0.450387	0.351555
rs17704885	11739395_a_at	MFHAS1	2.00164	0.0456903	0.451005	0.0918904
rs9812589	11755476_a_at	NMNAT3	-1.99832	0.0460499	0.453812	-0.133833
rs185302072	11759737_x_at	BIRC5	-1.99808	0.0460753	0.453812	-0.371345
rs114182264	11724840_at	PKN2	1.99678	0.0462172	0.454424	0.514376
rs76406842	11757588_a_at	ALG5	-1.99657	0.0462399	0.454424	-0.512004
rs116862617	11756453_a_at	SH2D3C	-1.99587	0.0463164	0.454424	-0.175004
rs56157839	11742625_at	OR10V1	-1.99524	0.0463853	0.454424	-0.0222894
rs1151065	11747797_a_at	MS4A14	1.9952	0.0463894	0.454424	0.0555653
rs2847655	11740873_x_at	MS4A7	1.99437	0.0464796	0.454445	0.0522658
rs11824734	11738730_at	OR5A1	-1.99426	0.0464922	0.454445	-0.0220409
rs9839996	11749262_a_at	MST1R	-1.99213	0.0467256	0.456232	-0.334487
rs201857791	11719040_s_at	CYGB	1.9915	0.0467954	0.45642	0.154866
rs2847666	11728750_a_at	OSBP	-1.99065	0.0468887	0.456632	-0.0354836
rs7929589	11728002_at	MS4A6E	1.99002	0.046958	0.456632	0.0154825
rs558788	11738939_a_at	MS4A13	1.98991	0.0469707	0.456632	0.0151639
rs74861994	11720223_at	GFPT1	-1.98932	0.0470356	0.456632	-0.287983
rs11230228	11728002_at	MS4A6E	-1.98901	0.0470702	0.456632	-0.0168222
rs57827007	11721909_at	CRAMP1	1.98798	0.0471836	0.45724	0.474836
rs7232	11716736_at	PRPF19	-1.98722	0.0472682	0.457568	-0.0335945
rs7926354	11716736_at	PRPF19	-1.98472	0.0475462	0.459766	-0.0333457
rs75411903	11729424_s_at	CCRL2	-1.98419	0.0476055	0.459846	-0.603419
rs3799468	11755624_a_at	MTFR2	1.98257	0.0477866	0.460627	0.46335
rs684961	11730569_at	MS4A5	1.98256	0.0477884	0.460627	0.0179565
rs115274671	11727085_s_at	GJB2	-1.98157	0.0478996	0.461206	-0.0877734
rs4938933	11751363_a_at	CCDC86	-1.97961	0.0481191	0.462398	-0.02463
rs78571577	11745417_a_at	NOTCH2	1.97955	0.0481258	0.462398	0.446585
rs115600982	11716386_a_at	RAB11FIP5	1.97772	0.0483326	0.463161	0.466861
rs11150819	11754110_x_at	BIRC5	-1.97765	0.0483409	0.463161	-0.0426939
rs61897945	11752065_a_at	CD6	-1.97749	0.0483593	0.463161	-0.0774663
rs3799468	11733478_at	OLIG3	-1.97673	0.0484451	0.46349	-0.181038
rs59224344	11747797_a_at	MS4A14	1.97429	0.0487226	0.465652	0.0611741
rs115332380	11737190_a_at	ZGRF1	-1.97285	0.0488861	0.466431	-0.370393
rs2847666	11740871_a_at	MS4A7	1.97267	0.0489076	0.466431	0.0666965
rs73214651	11719026_a_at	PSD3	-1.97164	0.0490244	0.467052	-0.0991732
rs55846997	11725176_s_at	AGTR1	-1.96716	0.0495403	0.47122	-0.0292915
rs11230228	11755384_s_at	OSBP	1.9665	0.049616	0.47122	0.0223688
rs59224344	11748336_a_at	GIF	-1.96648	0.0496186	0.47122	-0.0219798
rs61897948	11747797_a_at	MS4A14	1.96566	0.0497133	0.471623	0.058661
rs201857791	11756588_a_at	ST6GALNAC1	1.96376	0.0499337	0.47293	0.272217
rs2583476	11748962_a_at	PATL1	-1.96357	0.0499559	0.47293	-0.0286976
