# Supplementary material for: Genome-Wide Association Studies for Cerebrospinal Fluid Soluble TREM2 in Alzheimer’s Disease
Source: Front Aging Neurosci. 2019 Oct 25;11:297. doi: 10.3389/fnagi.2019.00297 (PMC6823606; doi:10.3389/fnagi.2019.00297)
Supplement: Supplementary file 5 [file Table_4.XLSX]

## Sheet: eQTL_TREM2_trans_4-6-19_map_FDR
SNP	Probe ID	Gene	statistic	p-value	FDR	beta
rs113239743	11763516_a_at	CPT1C	-14.8672	6.52613e-44	7.7293e-37	-2.58522
rs113239743	11749521_a_at	CPT1C	-14.7769	1.8371e-43	1.08789e-36	-1.93374
rs2971627	11715796_s_at	LUM	-12.7471	9.02817e-34	2.67316e-27	-2.29203
rs2911645	11715796_s_at	LUM	-12.7471	9.02817e-34	2.67316e-27	-2.29203
rs113239743	11737064_a_at	TESMIN	-11.9332	3.91292e-30	9.26862e-24	-2.50313
rs117153530	11752762_s_at	NA	-11.8241	1.17014e-29	2.30978e-23	-1.80215
rs113239743	11755511_x_at	TESMIN	-11.5973	1.11469e-28	1.88599e-22	-2.41148
rs115619982	11732086_a_at	OTOF	-11.3008	2.03345e-27	3.01043e-21	-3.05604
rs114191746	11715248_s_at	CRISP2	-11.2371	3.76831e-27	4.95894e-21	-1.67171
rs113239743	11725816_a_at	CPT1C	-11.2191	4.48129e-27	5.30747e-21	-2.18057
rs115904095	11715248_s_at	CRISP2	-10.8452	1.58891e-25	1.71077e-19	-1.62157
rs113239743	11719199_a_at	CCND2	-10.8003	2.42529e-25	2.39369e-19	-2.57955
rs2814778	11720894_a_at	SOS1	-10.6572	9.24861e-25	5.40054e-19	-0.55189
rs76465000	11716384_at	CCL2	-10.6327	1.16216e-24	5.40054e-19	-4.64259
rs114628552	11716384_at	CCL2	-10.6326	1.16285e-24	5.40054e-19	-4.64255
rs77001965	11716384_at	CCL2	-10.6314	1.17594e-24	5.40054e-19	-4.64209
rs116832035	11716384_at	CCL2	-10.6306	1.18498e-24	5.40054e-19	-4.64177
rs114216342	11716384_at	CCL2	-10.6306	1.18498e-24	5.40054e-19	-4.64177
rs73633773	11716384_at	CCL2	-10.6306	1.18498e-24	5.40054e-19	-4.64177
rs17083871	11716384_at	CCL2	-10.6306	1.18498e-24	5.40054e-19	-4.64177
rs79598670	11716384_at	CCL2	-10.6306	1.18498e-24	5.40054e-19	-4.64177
rs185302072	11716384_at	CCL2	-10.6306	1.18498e-24	5.40054e-19	-4.64177
rs115754734	11716384_at	CCL2	-10.6302	1.18884e-24	5.40054e-19	-4.64164
rs79225353	11716384_at	CCL2	-10.6296	1.19548e-24	5.40054e-19	-4.64142
rs73145075	11716384_at	CCL2	-10.6289	1.20332e-24	5.40054e-19	-4.64115
rs55997566	11716384_at	CCL2	-10.6285	1.20772e-24	5.40054e-19	-4.64101
rs61744238	11716384_at	CCL2	-10.6265	1.23117e-24	5.40054e-19	-4.64036
rs11570112	11715248_s_at	CRISP2	-10.5945	1.65618e-24	5.87285e-19	-3.54369
rs116087048	11715248_s_at	CRISP2	-10.5839	1.82853e-24	5.87285e-19	-3.54058
rs74395607	11715248_s_at	CRISP2	-10.5839	1.82853e-24	5.87285e-19	-3.54058
rs202224378	11715248_s_at	CRISP2	-10.5839	1.82853e-24	5.87285e-19	-3.54058
rs117493280	11715248_s_at	CRISP2	-10.5839	1.82853e-24	5.87285e-19	-3.54058
rs12340865	11715248_s_at	CRISP2	-10.5839	1.82853e-24	5.87285e-19	-3.54058
rs116461055	11715248_s_at	CRISP2	-10.5839	1.82853e-24	5.87285e-19	-3.54058
rs199849618	11715248_s_at	CRISP2	-10.5839	1.82853e-24	5.87285e-19	-3.54058
rs57827007	11715248_s_at	CRISP2	-10.5839	1.82853e-24	5.87285e-19	-3.54058
rs117189591	11715248_s_at	CRISP2	-10.5835	1.83471e-24	5.87285e-19	-3.54048
rs113239743	11744280_a_at	TIMM44	-10.2609	3.5259e-23	1.09893e-17	-1.85467
rs113239743	11722539_at	CLDN15	-10.1303	1.14499e-22	3.47713e-17	-2.41732
rs115619982	11740095_a_at	LRRC2	-10.0931	1.599e-22	4.7345e-17	-1.3498
rs117153530	11728491_s_at	KANK4	-10.0874	1.68188e-22	4.85843e-17	-1.04895
rs75540417	11731947_at	PAQR9	-10.0034	3.55949e-22	1.00374e-16	-2.88321
rs2814778	11743089_a_at	LRRC6	9.96513	4.99805e-22	1.37663e-16	0.821307
rs2814778	11729874_at	SIGLEC9	9.94287	6.08787e-22	1.63869e-16	0.374035
rs200653222	11732712_a_at	FST	-9.8974	9.09835e-22	2.39461e-16	-2.18766
rs2814778	11726178_a_at	SOX6	-9.83029	1.6423e-21	4.22842e-16	-0.604644
rs115619982	11729941_at	TMEM56	-9.80957	1.96955e-21	4.9631e-16	-2.25973
rs115619982	11741749_x_at	LRRC2	-9.53778	2.07958e-20	5.13121e-15	-1.87751
rs2814778	11742316_x_at	NA	-9.53172	2.19056e-20	5.29473e-15	-0.505026
rs2814778	11741786_a_at	TSPAN16	9.38415	7.70691e-20	1.82556e-14	0.608606
rs2814778	11717123_a_at	PPP1R12B	9.36274	9.23895e-20	2.14554e-14	0.455801
rs16996942	11740095_a_at	LRRC2	-9.26875	2.03979e-19	4.64585e-14	-1.02258
rs2814778	11737413_at	MICALCL	-9.19875	3.66475e-19	8.18941e-14	-0.499013
rs2814778	11759103_at	CYP4F3	9.1686	4.71172e-19	1.0334e-13	0.47116
rs75540417	11728685_at	FAM83A	-9.15926	5.09245e-19	1.0966e-13	-1.66532
rs10487776	11741749_x_at	LRRC2	-9.14275	5.84143e-19	1.23542e-13	-1.4771
rs2814778	11742144_x_at	NA	-9.12952	6.51963e-19	1.35467e-13	-0.527955
rs2814778	11723030_at	CRISPLD2	9.1253	6.75175e-19	1.37871e-13	0.319559
rs113239743	11764027_at	MRPS11	-9.11617	7.28313e-19	1.46201e-13	-3.21538
rs3799468	11754719_x_at	RAI2	-9.07216	1.04815e-18	2.06898e-13	-2.33111
rs3799468	11725105_a_at	RAI2	-9.06776	1.08685e-18	2.1102e-13	-2.15164
rs115619982	11757573_s_at	FZD5	-9.05881	1.17018e-18	2.23535e-13	-1.8177
rs75540417	11729941_at	TMEM56	-9.01506	1.67741e-18	3.13869e-13	-1.71223
rs2814778	11717136_x_at	PCSK1N	-9.01372	1.69607e-18	3.13869e-13	-0.45084
rs115619982	11728685_at	FAM83A	-8.9984	1.92327e-18	3.50438e-13	-2.00599
rs78571577	11757573_s_at	FZD5	-8.99526	1.97342e-18	3.54127e-13	-1.47577
rs113239743	11743832_a_at	RALGPS1	-8.99285	2.01294e-18	3.55829e-13	-1.8924
rs113239743	11751827_a_at	LRRC28	-8.96833	2.46064e-18	4.28573e-13	-1.78306
rs115619982	11719440_at	NA	-8.96142	2.6038e-18	4.46933e-13	-2.06529
rs113239743	11739588_a_at	RERE	-8.955	2.74417e-18	4.64298e-13	-2.43772
rs2814778	11731442_at	ARHGEF12	-8.94865	2.89019e-18	4.82117e-13	-0.555892
rs2814778	11727597_at	PADI2	8.94182	3.05595e-18	5.02688e-13	0.30253
rs16996942	11732086_a_at	OTOF	-8.9223	3.58334e-18	5.81366e-13	-2.02872
rs115156754	11724273_a_at	PTPRK	-8.90513	4.12108e-18	6.59575e-13	-0.955615
rs115600982	11727390_a_at	STEAP2	-8.84988	6.45365e-18	1.01913e-12	-0.607852
rs17056310	11761028_at	GTF3C5	-8.84743	6.5831e-18	1.02589e-12	-1.01861
rs113239743	11749141_a_at	TRAF5	-8.84579	6.67134e-18	1.02614e-12	-2.72571
rs78571577	11740095_a_at	LRRC2	-8.80378	9.36726e-18	1.42234e-12	-0.976279
rs2814778	11721930_a_at	TMCC2	-8.79296	1.02208e-17	1.53229e-12	-0.505753
rs2814778	11722469_a_at	ACSL6	-8.78268	1.11029e-17	1.64373e-12	-0.583813
rs75540417	11732237_a_at	GYPA	-8.76373	1.29312e-17	1.89077e-12	-1.93765
rs2814778	11731135_a_at	LTB4R	8.72874	1.7123e-17	2.47315e-12	0.400815
rs9603820	11758231_x_at	HLA-DPA1	8.71731	1.87641e-17	2.67753e-12	0.56905
rs116450299	11715248_s_at	CRISP2	-8.71045	1.98214e-17	2.79472e-12	-1.13022
rs2814778	11719784_x_at	RPS23	8.70138	2.13122e-17	2.96957e-12	0.770009
rs114106603	11763149_a_at	GYPB	-8.68979	2.338e-17	3.21982e-12	-1.52281
rs75147441	11715248_s_at	CRISP2	-8.68657	2.39888e-17	3.22857e-12	-2.10198
rs75949790	11715248_s_at	CRISP2	-8.68657	2.39888e-17	3.22857e-12	-2.10198
rs115619982	11741468_a_at	SOX6	-8.66426	2.86573e-17	3.81355e-12	-2.06272
rs115619982	11716384_at	CCL2	-8.63657	3.57187e-17	4.67853e-12	-2.73088
rs113239743	11762712_x_at	NA	-8.63577	3.59473e-17	4.67853e-12	-3.16555
rs75540417	11751473_a_at	NAPG	-8.62153	4.02491e-17	5.18146e-12	-1.71261
rs115619982	11733432_at	AK7	-8.61641	4.19169e-17	5.33815e-12	-0.843806
rs113239743	11726735_a_at	TLK2	-8.61145	4.35966e-17	5.493e-12	-1.77873
rs2814778	11735040_at	RPL3L	-8.57467	5.83232e-17	7.26493e-12	-0.25108
rs78571577	11733432_at	AK7	-8.57346	5.88869e-17	7.26493e-12	-0.686309
rs2814778	11733767_a_at	LILRA2	8.56131	6.48138e-17	7.91371e-12	0.196128
rs2814778	11757957_s_at	SOX6	-8.54586	7.32063e-17	8.84722e-12	-0.752819
rs2814778	11728810_a_at	ECHDC3	8.5421	7.54074e-17	9.02117e-12	0.503056
rs2814778	11747143_x_at	ACSL6	-8.53228	8.14678e-17	9.64874e-12	-0.639124
rs2814778	11733101_at	USP12	-8.52987	8.30296e-17	9.73635e-12	-0.296587
rs113239743	11743751_a_at	NUDT13	-8.52211	8.82501e-17	1.02471e-11	-1.80807
rs56413328	11715495_a_at	RPS25	8.49626	1.0811e-16	1.24312e-11	0.667671
rs77323212	11715495_a_at	RPS25	8.49322	1.1072e-16	1.26089e-11	0.667452
rs2814778	11753421_a_at	CITED2	-8.48563	1.17502e-16	1.32538e-11	-0.239576
rs9603820	11743089_a_at	LRRC6	8.47006	1.32736e-16	1.48309e-11	1.09288
rs2814778	11716815_at	SLC2A1	-8.46486	1.38236e-16	1.5301e-11	-0.450883
rs2814778	11744689_x_at	ARMC10	-8.44985	1.55436e-16	1.70456e-11	-0.226185
rs2814778	11721106_a_at	RAB3GAP1	8.4441	1.6257e-16	1.76644e-11	0.263194
rs2814778	11759092_at	USP12	-8.43862	1.69674e-16	1.82687e-11	-0.507657
rs2814778	11722470_x_at	ACSL6	-8.4255	1.87941e-16	2.00531e-11	-0.570394
rs2814778	11742750_a_at	GSPT1	-8.42245	1.9246e-16	2.0352e-11	-0.660758
rs2814778	11718891_s_at	NA	-8.41656	2.01496e-16	2.11189e-11	-0.338986
rs2814778	11724993_at	RFLNB	8.39592	2.36568e-16	2.45774e-11	0.209645
rs2814778	11734144_s_at	NA	8.38923	2.49187e-16	2.56633e-11	0.48965
rs2814778	11761101_at	FCAR	8.38551	2.56491e-16	2.61878e-11	0.456844
rs2814778	11722681_at	RBP7	8.38429	2.58929e-16	2.62107e-11	0.342634
rs80287706	11727069_at	UNC5B	-8.37177	2.85314e-16	2.85704e-11	-1.05047
rs200385090	11727069_at	UNC5B	-8.37098	2.87064e-16	2.85704e-11	-1.05038
rs189740529	11736733_a_at	DPY19L3	-8.36029	3.11865e-16	3.07801e-11	-0.857898
rs2814778	11733768_x_at	LILRA2	8.35197	3.32591e-16	3.25544e-11	0.222211
rs2814778	11735429_x_at	RNF135	8.34741	3.44541e-16	3.34476e-11	0.239091
rs115619982	11760253_x_at	IFI44	-8.34501	3.50986e-16	3.37476e-11	-3.89271
rs113239743	11718422_s_at	CCNB1IP1	-8.34415	3.5333e-16	3.37476e-11	-1.91551
rs2814778	11743928_at	NSUN3	-8.33598	3.76341e-16	3.56579e-11	-0.375517
rs2814778	11752701_s_at	NA	-8.32678	4.04046e-16	3.79791e-11	-0.761011
rs78571577	11731947_at	PAQR9	-8.32212	4.18847e-16	3.90603e-11	-2.44409
rs2814778	11728908_at	B3GLCT	-8.31523	4.41706e-16	4.08703e-11	-0.395825
rs73116023	11721290_a_at	F3	-8.29833	5.03101e-16	4.61902e-11	-0.852041
rs17056310	11731850_a_at	COLQ	-8.29456	5.17896e-16	4.71828e-11	-1.22296
rs115619982	11741544_at	SLFN14	-8.29292	5.24479e-16	4.74178e-11	-1.15612
rs2814778	11763311_a_at	CSNK1D	8.2841	5.61253e-16	5.01489e-11	0.160768
rs2814778	11736537_a_at	NA	-8.28366	5.63156e-16	5.01489e-11	-0.598595
rs2814778	11753170_a_at	CD300C	8.27349	6.089e-16	5.38178e-11	0.409191
rs2814778	11725950_s_at	RIOK3	-8.25707	6.9066e-16	5.81566e-11	-0.429879
rs117331810	11729125_s_at	RCN2	-8.2534	7.10326e-16	5.81566e-11	-1.48602
rs9839996	11729125_s_at	RCN2	-8.2534	7.10326e-16	5.81566e-11	-1.48602
rs76089552	11729125_s_at	RCN2	-8.2534	7.10326e-16	5.81566e-11	-1.48602
rs201877628	11729125_s_at	RCN2	-8.2534	7.10326e-16	5.81566e-11	-1.48602
rs76713772	11729125_s_at	RCN2	-8.2534	7.10326e-16	5.81566e-11	-1.48602
rs114450321	11729125_s_at	RCN2	-8.2534	7.10326e-16	5.81566e-11	-1.48602
rs116226558	11729125_s_at	RCN2	-8.2534	7.10326e-16	5.81566e-11	-1.48602
rs76406842	11729125_s_at	RCN2	-8.2534	7.10326e-16	5.81566e-11	-1.48602
rs9984933	11729125_s_at	RCN2	-8.2534	7.10326e-16	5.81566e-11	-1.48602
rs75135281	11729125_s_at	RCN2	-8.25276	7.13838e-16	5.81566e-11	-1.48592
rs115515568	11729125_s_at	RCN2	-8.2522	7.16915e-16	5.81566e-11	-1.48582
rs2814778	11717135_a_at	PCSK1N	-8.23892	7.9363e-16	6.39419e-11	-0.386938
rs17172670	11746355_a_at	RAD9B	-8.2311	8.42563e-16	6.66915e-11	-0.67585
rs2814778	11752881_s_at	NA	-8.22639	8.73414e-16	6.66915e-11	-0.721116
rs75135281	11738780_at	EPGN	-8.22293	8.96799e-16	6.66915e-11	-2.03577
rs117331810	11738780_at	EPGN	-8.22272	8.98267e-16	6.66915e-11	-2.03572
rs9839996	11738780_at	EPGN	-8.22272	8.98267e-16	6.66915e-11	-2.03572
rs76089552	11738780_at	EPGN	-8.22272	8.98267e-16	6.66915e-11	-2.03572
rs201877628	11738780_at	EPGN	-8.22272	8.98267e-16	6.66915e-11	-2.03572
rs76713772	11738780_at	EPGN	-8.22272	8.98267e-16	6.66915e-11	-2.03572
rs114450321	11738780_at	EPGN	-8.22272	8.98267e-16	6.66915e-11	-2.03572
rs116226558	11738780_at	EPGN	-8.22272	8.98267e-16	6.66915e-11	-2.03572
rs76406842	11738780_at	EPGN	-8.22272	8.98267e-16	6.66915e-11	-2.03572
rs9984933	11738780_at	EPGN	-8.22272	8.98267e-16	6.66915e-11	-2.03572
rs115515568	11738780_at	EPGN	-8.22218	9.01952e-16	6.66915e-11	-2.0356
rs2814778	11756238_s_at	SLC2A1	-8.22151	9.06592e-16	6.66915e-11	-0.285458
rs75540417	11740095_a_at	LRRC2	-8.2188	9.25596e-16	6.76692e-11	-0.917038
rs16996942	11719440_at	NA	-8.20602	1.02038e-15	7.41412e-11	-1.55764
rs75540417	11741749_x_at	LRRC2	-8.19998	1.06845e-15	7.71603e-11	-1.3382
rs56413328	11715796_s_at	LUM	-8.1866	1.18308e-15	8.49105e-11	-1.90571
rs77323212	11715796_s_at	LUM	-8.18583	1.1901e-15	8.49105e-11	-1.90554
rs2814778	11752300_a_at	PADI2	8.18402	1.2066e-15	8.55722e-11	0.641164
rs2814778	11744965_x_at	TMCC2	-8.18043	1.24002e-15	8.74189e-11	-0.597577
rs115156754	11761028_at	GTF3C5	-8.17033	1.33899e-15	9.38372e-11	-0.847945
rs78571577	11741749_x_at	LRRC2	-8.15972	1.45134e-15	1.01112e-10	-1.33217
rs2814778	11733100_at	USP12	-8.15183	1.54091e-15	1.06725e-10	-0.408499
rs2814778	11729739_at	SIGLEC5	8.1355	1.74398e-15	1.20087e-10	0.448659
rs2814778	11761102_x_at	FCAR	8.13113	1.80256e-15	1.23403e-10	0.441184
rs2814778	11745373_a_at	SNX22	-8.12519	1.88551e-15	1.28341e-10	-0.63261
rs2814778	11731444_a_at	ARHGEF12	-8.11521	2.03332e-15	1.37611e-10	-0.496566
rs2814778	11719479_at	ALOX5AP	8.1143	2.0473e-15	1.3777e-10	0.160459
rs2814778	11754138_s_at	PSPH	-8.10493	2.19748e-15	1.46655e-10	-1.39873
rs75540417	11720606_a_at	SFRP2	-8.10453	2.20411e-15	1.46655e-10	-1.67905
rs2814778	11726820_a_at	ARHGAP9	8.08906	2.47693e-15	1.63887e-10	0.176899
rs75540417	11764077_s_at	EDIL3	-8.08635	2.52805e-15	1.66341e-10	-1.27902
rs17172670	11753380_a_at	C3orf67	-8.07843	2.6836e-15	1.756e-10	-0.448879
rs6752526	11729094_a_at	GAD1	-8.07265	2.80279e-15	1.82097e-10	-1.0137
rs16851571	11729094_a_at	GAD1	-8.07214	2.81365e-15	1.82097e-10	-1.01365
rs2814778	11728502_a_at	CD300C	8.05104	3.29727e-15	2.12237e-10	0.456403
rs75540417	11758545_s_at	RHAG	-8.04902	3.34764e-15	2.14315e-10	-1.53861
rs2814778	11730499_a_at	MXI1	-8.04826	3.36702e-15	2.14396e-10	-0.608046
rs76700790	11725088_at	MYH1	-8.02747	3.93494e-15	2.49034e-10	-0.547232
rs2814778	11726179_a_at	SOX6	-8.02412	4.03511e-15	2.49034e-10	-0.827314
rs116832035	11732086_a_at	OTOF	-8.01835	4.21331e-15	2.49034e-10	-3.18357
rs114216342	11732086_a_at	OTOF	-8.01835	4.21331e-15	2.49034e-10	-3.18357
rs73633773	11732086_a_at	OTOF	-8.01835	4.21331e-15	2.49034e-10	-3.18357
rs17083871	11732086_a_at	OTOF	-8.01835	4.21331e-15	2.49034e-10	-3.18357
rs79598670	11732086_a_at	OTOF	-8.01835	4.21331e-15	2.49034e-10	-3.18357
rs185302072	11732086_a_at	OTOF	-8.01835	4.21331e-15	2.49034e-10	-3.18357
rs9603820	11734144_s_at	NA	8.01827	4.21575e-15	2.49034e-10	0.723212
rs55997566	11732086_a_at	OTOF	-8.01823	4.21705e-15	2.49034e-10	-3.18354
rs115754734	11732086_a_at	OTOF	-8.01811	4.2209e-15	2.49034e-10	-3.18349
rs79225353	11732086_a_at	OTOF	-8.018	4.22419e-15	2.49034e-10	-3.18345
rs77001965	11732086_a_at	OTOF	-8.01781	4.23008e-15	2.49034e-10	-3.18338
rs115332380	11715248_s_at	CRISP2	-8.0175	4.24015e-15	2.49034e-10	-1.95358
rs76465000	11732086_a_at	OTOF	-8.01719	4.24992e-15	2.49034e-10	-3.18317
rs114628552	11732086_a_at	OTOF	-8.01693	4.2581e-15	2.49034e-10	-3.18306
rs73145075	11732086_a_at	OTOF	-8.01661	4.26845e-15	2.49034e-10	-3.18294
rs2814778	11724635_at	YOD1	-8.01423	4.34524e-15	2.52271e-10	-0.730208
rs61744238	11732086_a_at	OTOF	-8.01101	4.45097e-15	2.57149e-10	-3.18099
rs2814778	11737268_s_at	NA	-7.96596	6.2298e-15	3.43386e-10	-0.705512
rs116832035	11737857_a_at	DNAAF1	-7.96576	6.23904e-15	3.43386e-10	-2.50553
rs114216342	11737857_a_at	DNAAF1	-7.96576	6.23904e-15	3.43386e-10	-2.50553
rs73633773	11737857_a_at	DNAAF1	-7.96576	6.23904e-15	3.43386e-10	-2.50553
rs17083871	11737857_a_at	DNAAF1	-7.96576	6.23904e-15	3.43386e-10	-2.50553
rs79598670	11737857_a_at	DNAAF1	-7.96576	6.23904e-15	3.43386e-10	-2.50553
rs185302072	11737857_a_at	DNAAF1	-7.96576	6.23904e-15	3.43386e-10	-2.50553
rs115754734	11737857_a_at	DNAAF1	-7.96563	6.24497e-15	3.43386e-10	-2.50549
rs76465000	11737857_a_at	DNAAF1	-7.96501	6.27404e-15	3.43386e-10	-2.50532
rs73145075	11737857_a_at	DNAAF1	-7.96498	6.27523e-15	3.43386e-10	-2.5053
rs79225353	11737857_a_at	DNAAF1	-7.96433	6.30569e-15	3.43386e-10	-2.50511
rs77001965	11737857_a_at	DNAAF1	-7.96413	6.31495e-15	3.43386e-10	-2.50506
rs55997566	11737857_a_at	DNAAF1	-7.96402	6.32054e-15	3.43386e-10	-2.50503
rs61744238	11737857_a_at	DNAAF1	-7.96272	6.38159e-15	3.44702e-10	-2.50473
rs114628552	11737857_a_at	DNAAF1	-7.96181	6.42513e-15	3.44702e-10	-2.50439
rs2814778	11728503_at	CD300C	7.96167	6.43208e-15	3.44702e-10	0.473118
rs2814778	11729853_at	PADI4	7.95831	6.59494e-15	3.51838e-10	0.434469
rs2814778	11724237_a_at	LAT2	7.95748	6.63575e-15	3.52427e-10	0.22234
rs117179287	11754719_x_at	RAI2	-7.95024	7.00234e-15	3.70237e-10	-1.60334
rs2814778	11721928_a_at	TMCC2	-7.94013	7.5488e-15	3.97356e-10	-0.403358
rs2814778	11733482_a_at	DYRK3	-7.9278	8.27196e-15	4.33495e-10	-0.59343
rs2814778	11734870_a_at	NADK	7.9066	9.67887e-15	5.0499e-10	0.140892
rs115619982	11761793_a_at	FAM122C	-7.90475	9.8127e-15	5.08226e-10	-0.794435
rs2814778	11730996_a_at	JAML	7.90455	9.8267e-15	5.08226e-10	0.135407
rs2814778	11749604_s_at	NA	7.88882	1.10388e-14	5.68434e-10	0.479978
rs75540417	11761793_a_at	FAM122C	-7.88697	1.1191e-14	5.7165e-10	-0.647748
rs2814778	11762860_x_at	CD300C	7.88688	1.11978e-14	5.7165e-10	0.334988
rs115619982	11731947_at	PAQR9	-7.88627	1.12491e-14	5.71801e-10	-2.8472
rs6077266	11715248_s_at	CRISP2	-7.87462	1.2259e-14	6.20473e-10	-1.92149
rs2814778	11733942_a_at	TBCEL	-7.86526	1.31346e-14	6.61962e-10	-0.580407
rs117153530	11729473_at	FANCA	-7.85172	1.45116e-14	7.28261e-10	-1.49174
rs2814778	11726180_a_at	SOX6	-7.85026	1.46681e-14	7.33008e-10	-0.430159
rs2814778	11755367_s_at	DNAAF3	-7.84698	1.50264e-14	7.47761e-10	-0.168568
rs2814778	11721566_s_at	KBTBD11	7.84574	1.51642e-14	7.51459e-10	0.258188
rs115619982	11758545_s_at	RHAG	-7.81746	1.86647e-14	9.21076e-10	-1.83315
rs74556234	11729125_s_at	RCN2	-7.81662	1.8779e-14	9.2287e-10	-1.00022
rs2814778	11734953_at	MBNL3	-7.81454	1.90674e-14	9.33169e-10	-0.375026
rs2814778	11725738_at	2019-03-03	-7.80547	2.03779e-14	9.932e-10	-0.434166
rs79112113	11728601_at	COX8C	-7.79814	2.15014e-14	1.04367e-09	-0.672474
rs75265799	11715395_a_at	NA	7.79381	2.21935e-14	1.07286e-09	5.15572
rs75265799	11764256_s_at	ND4	7.79204	2.24828e-14	1.08243e-09	0.443555
rs10487776	11742302_at	NA	-7.78455	2.37475e-14	1.13869e-09	-1.15534
rs78571577	11741468_a_at	SOX6	-7.77395	2.56587e-14	1.22537e-09	-1.526
rs2814778	11730527_a_at	DAPK2	7.76995	2.64188e-14	1.2566e-09	0.378564
rs2814778	11738831_x_at	HSD17B13	7.76156	2.80859e-14	1.33055e-09	0.529868
rs2814778	11728421_a_at	PLA2G7	7.75724	2.89839e-14	1.36762e-09	0.502175
rs2814778	11741562_a_at	MME	7.75432	2.96085e-14	1.39155e-09	0.296139
rs2814778	11727596_a_at	PADI2	7.75294	2.99064e-14	1.4e-09	0.549009
rs10487776	11729941_at	TMEM56	-7.74566	3.15355e-14	1.47045e-09	-1.49067
rs113239743	11719356_at	PHETA2	-7.74273	3.22147e-14	1.49623e-09	-1.54902
rs75540417	11715495_a_at	RPS25	7.74106	3.26075e-14	1.50856e-09	0.500846
rs2814778	11731947_at	PAQR9	-7.73196	3.48387e-14	1.60551e-09	-0.411015
rs2814778	11739937_a_at	DYRK3	-7.71869	3.83618e-14	1.76102e-09	-0.434162
rs113239743	11761933_at	RPS4X	-7.71342	3.98561e-14	1.82255e-09	-1.37696
rs2814778	11749758_s_at	NA	7.70979	4.09202e-14	1.86401e-09	0.490138
rs2814778	11728839_s_at	TMCC3	7.706	4.20603e-14	1.90861e-09	0.279085
rs113239743	11737604_a_at	DNM1L	-7.70364	4.27866e-14	1.93415e-09	-1.94022
rs2814778	11727498_at	ZRANB1	-7.69988	4.39654e-14	1.97988e-09	-0.254661
rs2814778	11760063_x_at	CCL4L2	-7.69616	4.51659e-14	2.02624e-09	-0.461765
rs115619982	11741315_a_at	PLSCR4	-7.6937	4.59798e-14	2.05497e-09	-2.07331
rs75411903	11730932_at	ACSS3	-7.69101	4.68838e-14	2.08749e-09	-0.809978
rs113239743	11724757_a_at	GPBP1L1	-7.68929	4.74707e-14	2.10571e-09	-1.0039
rs115515568	11763011_at	IGKC	-7.68247	4.98698e-14	2.15328e-09	-1.25309
rs75135281	11763011_at	IGKC	-7.68202	5.00325e-14	2.15328e-09	-1.25302
rs117331810	11763011_at	IGKC	-7.68061	5.05431e-14	2.15328e-09	-1.2528
rs9839996	11763011_at	IGKC	-7.68061	5.05431e-14	2.15328e-09	-1.2528
rs76089552	11763011_at	IGKC	-7.68061	5.05431e-14	2.15328e-09	-1.2528
rs201877628	11763011_at	IGKC	-7.68061	5.05431e-14	2.15328e-09	-1.2528
rs76713772	11763011_at	IGKC	-7.68061	5.05431e-14	2.15328e-09	-1.2528
rs114450321	11763011_at	IGKC	-7.68061	5.05431e-14	2.15328e-09	-1.2528
rs116226558	11763011_at	IGKC	-7.68061	5.05431e-14	2.15328e-09	-1.2528
rs76406842	11763011_at	IGKC	-7.68061	5.05431e-14	2.15328e-09	-1.2528
rs9984933	11763011_at	IGKC	-7.68061	5.05431e-14	2.15328e-09	-1.2528
rs78571577	11729941_at	TMEM56	-7.67989	5.0808e-14	2.15681e-09	-1.47895
rs2814778	11763252_x_at	PSPH	-7.67552	5.24369e-14	2.21801e-09	-0.539021
rs189740529	11715248_s_at	CRISP2	-7.67471	5.27466e-14	2.22317e-09	-1.87637
rs2814778	11755190_a_at	POLR1D	-7.66635	5.60252e-14	2.35298e-09	-0.289235
rs1378833	11763252_x_at	PSPH	-7.6608	5.83159e-14	2.44053e-09	-0.545862
rs2814778	11763012_x_at	CCL4L2	-7.65664	6.0093e-14	2.50605e-09	-0.432257
rs201421746	11716384_at	CCL2	-7.64461	6.55289e-14	2.72316e-09	-2.44169
rs113239743	11747524_a_at	GALC	-7.63841	6.85228e-14	2.83762e-09	-1.66618
rs115619982	11732237_a_at	GYPA	-7.62484	7.55437e-14	3.11746e-09	-2.08743
rs2814778	11720487_a_at	HEBP2	7.61924	7.86455e-14	3.23419e-09	0.25493
rs115156754	11731850_a_at	COLQ	-7.61628	8.03324e-14	3.29213e-09	-1.01189
rs17172670	11762930_x_at	DKK4	-7.61338	8.20193e-14	3.34967e-09	-0.884746
rs9603820	11763012_x_at	CCL4L2	-7.61184	8.29355e-14	3.37545e-09	-0.661846
rs2814778	11727499_s_at	ZRANB1	-7.60545	8.68211e-14	3.51824e-09	-0.273033
rs189740529	11761428_at	LRRC7	-7.6051	8.70378e-14	3.51824e-09	-0.787285
rs16996942	11741749_x_at	LRRC2	-7.59639	9.26477e-14	3.73226e-09	-1.24712
rs2814778	11728926_at	NFAM1	7.58916	9.7569e-14	3.91718e-09	0.159575
rs2814778	11746014_s_at	NA	7.58467	1.00749e-13	4.03118e-09	0.279837
rs2814778	11763149_a_at	GYPB	-7.58106	1.03385e-13	4.12275e-09	-0.278956
rs113239743	11758788_at	PHF5A	-7.57524	1.0778e-13	4.28359e-09	-1.38064
rs2814778	11736118_a_at	ZFAND5	-7.5609	1.19402e-13	4.72961e-09	-0.238655
rs75540417	11729571_a_at	FAM83A	-7.56036	1.19857e-13	4.73182e-09	-2.89755
rs2814778	11762593_x_at	NUMA1	-7.55605	1.23598e-13	4.8633e-09	-0.977242
rs2814778	11755120_a_at	PSME4	-7.54181	1.36802e-13	5.36499e-09	-0.219078
rs118186656	11715248_s_at	CRISP2	-7.53673	1.41835e-13	5.54404e-09	-1.84509
rs2814778	11747673_a_at	SACM1L	-7.53599	1.42585e-13	5.55501e-09	-0.233759
rs75540417	11757573_s_at	FZD5	-7.53281	1.45852e-13	5.66367e-09	-1.25454
rs10666077	11744117_at	THSD7A	-7.52613	1.52943e-13	5.91959e-09	-0.918727
rs138017690	11737249_a_at	C9orf43	-7.50742	1.74665e-13	6.73834e-09	-0.962518
rs10487776	11740095_a_at	LRRC2	-7.50597	1.76475e-13	6.78605e-09	-0.843405
rs113239743	11736863_a_at	EMC6	-7.49879	1.85687e-13	7.11719e-09	-1.55781
rs75540417	11733101_at	USP12	-7.49833	1.86296e-13	7.11749e-09	-1.46401
rs10487776	11741468_a_at	SOX6	-7.49647	1.88769e-13	7.18877e-09	-1.47546
rs2814778	11752673_x_at	LMNA	-7.47959	2.12721e-13	8.07494e-09	-0.243372
rs16996942	11729941_at	TMEM56	-7.47697	2.16697e-13	8.19959e-09	-1.44267
rs2814778	11726346_a_at	LAT2	7.46635	2.33583e-13	8.8104e-09	0.24963
rs2814778	11724544_a_at	POLR1A	-7.45991	2.44438e-13	9.19059e-09	-0.365412
rs2814778	11728879_at	PPP3R1	-7.45878	2.46407e-13	9.23528e-09	-0.364858
rs78571577	11732237_a_at	GYPA	-7.45815	2.4751e-13	9.24735e-09	-1.6709
rs2814778	11752572_a_at	SLC2A1	-7.4393	2.82667e-13	1.05277e-08	-0.428259
rs2814778	11717971_s_at	FAM20B	-7.43873	2.83804e-13	1.05369e-08	-0.232486
rs10666077	11724273_a_at	PTPRK	-7.42423	3.14263e-13	1.16313e-08	-0.738817
rs9603820	11726178_a_at	SOX6	-7.42022	3.23251e-13	1.19267e-08	-0.720858
rs2814778	11737890_x_at	LAT2	7.41561	3.33876e-13	1.22804e-08	0.243866
rs2814778	11748604_a_at	DAPK2	7.41126	3.4424e-13	1.26224e-08	0.390987
rs2814778	11736538_s_at	NA	-7.40519	3.59204e-13	1.31305e-08	-0.727208
rs2814778	11734910_a_at	WDR26	-7.39819	3.77285e-13	1.3749e-08	-0.383999
rs2814778	11727970_a_at	SLC14A1	-7.39652	3.81729e-13	1.38683e-08	-0.578491
rs9603820	11744689_x_at	ARMC10	-7.38491	4.14031e-13	1.49958e-08	-0.307553
rs2814778	11743344_a_at	RMND5A	-7.37753	4.35985e-13	1.57428e-08	-0.347711
rs9603820	11737413_at	MICALCL	-7.37658	4.38888e-13	1.57995e-08	-0.627707
rs2814778	11716812_x_at	SIN3B	7.37486	4.44176e-13	1.59414e-08	0.259126
rs2814778	11736463_x_at	LILRA2	7.35959	4.94165e-13	1.76819e-08	0.316176
rs9603820	11718347_a_at	S100P	7.35697	5.03283e-13	1.79539e-08	0.986161
rs117153530	11716384_at	CCL2	-7.35247	5.19345e-13	1.84713e-08	-2.35486
rs200385090	11752433_x_at	SMPD4	-7.34879	5.32829e-13	1.88711e-08	-0.991049
rs2814778	11734354_s_at	ANK1	-7.34851	5.33869e-13	1.88711e-08	-0.544778
rs2814778	11743753_x_at	ZFAND5	-7.34811	5.35367e-13	1.88711e-08	-0.230476
rs80287706	11752433_x_at	SMPD4	-7.34717	5.38865e-13	1.89251e-08	-0.990848
rs117331810	11733727_s_at	SNAP25	-7.34349	5.52878e-13	1.89251e-08	-0.973788
rs9839996	11733727_s_at	SNAP25	-7.34349	5.52878e-13	1.89251e-08	-0.973788
rs76089552	11733727_s_at	SNAP25	-7.34349	5.52878e-13	1.89251e-08	-0.973788
rs201877628	11733727_s_at	SNAP25	-7.34349	5.52878e-13	1.89251e-08	-0.973788
rs76713772	11733727_s_at	SNAP25	-7.34349	5.52878e-13	1.89251e-08	-0.973788
rs114450321	11733727_s_at	SNAP25	-7.34349	5.52878e-13	1.89251e-08	-0.973788
rs116226558	11733727_s_at	SNAP25	-7.34349	5.52878e-13	1.89251e-08	-0.973788
rs76406842	11733727_s_at	SNAP25	-7.34349	5.52878e-13	1.89251e-08	-0.973788
rs9984933	11733727_s_at	SNAP25	-7.34349	5.52878e-13	1.89251e-08	-0.973788
rs75537281	11732962_a_at	RAB33A	7.34203	5.58508e-13	1.90319e-08	1.92482
rs115515568	11733727_s_at	SNAP25	-7.3415	5.60594e-13	1.90319e-08	-0.973544
rs12686385	11732962_a_at	RAB33A	7.34144	5.60821e-13	1.90319e-08	1.92467
rs75135281	11733727_s_at	SNAP25	-7.34054	5.64346e-13	1.90968e-08	-0.973426
rs113239743	11751180_a_at	ADAM10	-7.33804	5.74259e-13	1.93769e-08	-1.60925
rs2814778	11719657_a_at	MMP9	7.33146	6.0116e-13	2.0227e-08	0.590198
rs2814778	11736949_at	THEM5	-7.32018	6.50175e-13	2.18142e-08	-0.609727
rs2814778	11745300_a_at	DNAJC6	-7.31848	6.57908e-13	2.20113e-08	-0.475108
rs9603820	11729874_at	SIGLEC9	7.29483	7.75186e-13	2.5862e-08	0.434512
rs115110965	11715248_s_at	CRISP2	-7.28706	8.17996e-13	2.72136e-08	-1.78813
rs113239743	11757482_x_at	POLD2	-7.28465	8.31783e-13	2.75947e-08	-1.79752
rs2814778	11739744_x_at	MXI1	-7.27862	8.6719e-13	2.8689e-08	-0.41648
rs10487776	11757573_s_at	FZD5	-7.274	8.95296e-13	2.95363e-08	-1.21437
rs2814778	11758929_at	TFDP2	-7.2727	9.03383e-13	2.97204e-08	-0.584274
rs2814778	11749605_x_at	CYP4F3	7.27085	9.15e-13	3.00191e-08	0.455232
rs2814778	11728880_s_at	PPP3R1	-7.27023	9.18942e-13	3.00652e-08	-0.461664
rs117935913	11715248_s_at	CRISP2	-7.26735	9.37385e-13	3.05841e-08	-1.78362
rs73615423	11740323_at	TCTEX1D1	-7.26598	9.46296e-13	3.079e-08	-0.932696
rs2814778	11721818_s_at	SH3BP5L	7.25838	9.97229e-13	3.23583e-08	0.230056
rs2814778	11754046_a_at	SNX22	-7.25659	1.00967e-12	3.26726e-08	-0.273894
rs115619982	11729942_at	TMEM56	-7.25362	1.03051e-12	3.3256e-08	-2.15192
rs2814778	11739743_a_at	MXI1	-7.25276	1.03667e-12	3.33638e-08	-0.478742
rs2814778	11742143_s_at	NA	-7.24978	1.05813e-12	3.39622e-08	-0.727565
rs16996942	11728685_at	FAM83A	-7.24883	1.06512e-12	3.40942e-08	-1.34391
rs115619982	11719438_at	NA	-7.23681	1.15701e-12	3.68539e-08	-1.60913
rs2814778	11721338_a_at	WDR26	-7.23674	1.15756e-12	3.68539e-08	-0.51218
rs2814778	11726347_x_at	LAT2	7.23393	1.18014e-12	3.74722e-08	0.245536
rs2814778	11755037_s_at	KIAA0319L	7.23282	1.18921e-12	3.76591e-08	0.269972
rs115619982	11736293_a_at	SPATS2L	-7.22978	1.21433e-12	3.83523e-08	-3.11116
rs7528331	11743089_a_at	LRRC6	7.227	1.23779e-12	3.89892e-08	0.775129
rs9603820	11759870_x_at	CCL4L2	-7.2265	1.24202e-12	3.90186e-08	-0.628845
rs201857791	11757859_x_at	DLK1	-7.22387	1.26463e-12	3.96239e-08	-0.871451
rs78571577	11744614_x_at	SLC6A13	-7.21962	1.30208e-12	4.06896e-08	-0.916076
rs2814778	11742315_s_at	NA	-7.21587	1.33611e-12	4.16431e-08	-0.669852
rs7528331	11728908_at	B3GLCT	-7.21252	1.36714e-12	4.24983e-08	-0.438715
rs2814778	11759870_x_at	CCL4L2	-7.21138	1.37792e-12	4.27214e-08	-0.407679
rs2814778	11718221_a_at	GSPT1	-7.20877	1.40277e-12	4.33784e-08	-0.260048
rs76465000	11745689_a_at	CMPK2	-7.20618	1.42786e-12	4.35517e-08	-2.89217
rs2814778	11728613_a_at	TRIM10	-7.20598	1.4299e-12	4.35517e-08	-0.492169
rs75540417	11734518_at	PAGE2	-7.20572	1.43245e-12	4.35517e-08	-0.660293
rs77001965	11745689_a_at	CMPK2	-7.2048	1.44144e-12	4.35517e-08	-2.89164
rs115754734	11745689_a_at	CMPK2	-7.20322	1.45721e-12	4.35517e-08	-2.89104
rs114628552	11745689_a_at	CMPK2	-7.20313	1.45811e-12	4.35517e-08	-2.89101
rs116832035	11745689_a_at	CMPK2	-7.20302	1.45913e-12	4.35517e-08	-2.89097
rs114216342	11745689_a_at	CMPK2	-7.20302	1.45913e-12	4.35517e-08	-2.89097
rs73633773	11745689_a_at	CMPK2	-7.20302	1.45913e-12	4.35517e-08	-2.89097
rs17083871	11745689_a_at	CMPK2	-7.20302	1.45913e-12	4.35517e-08	-2.89097
rs79598670	11745689_a_at	CMPK2	-7.20302	1.45913e-12	4.35517e-08	-2.89097
rs185302072	11745689_a_at	CMPK2	-7.20302	1.45913e-12	4.35517e-08	-2.89097
rs115600982	11759798_at	LOC541472	-7.20299	1.45949e-12	4.35517e-08	-0.697389
rs79225353	11745689_a_at	CMPK2	-7.20254	1.46399e-12	4.35517e-08	-2.89079
rs73145075	11745689_a_at	CMPK2	-7.20231	1.46629e-12	4.35517e-08	-2.8907
rs55997566	11745689_a_at	CMPK2	-7.20222	1.46721e-12	4.35517e-08	-2.89067
rs80287706	11748016_a_at	ACTG2	-7.19478	1.54386e-12	4.57123e-08	-1.26162
rs2814778	11724776_at	PGM2L1	-7.19412	1.55091e-12	4.58063e-08	-0.334991
rs113239743	11747619_a_at	CERS5	-7.19258	1.56734e-12	4.61767e-08	-1.34176
rs200385090	11748016_a_at	ACTG2	-7.1918	1.57569e-12	4.63073e-08	-1.26113
rs61744238	11745689_a_at	CMPK2	-7.18629	1.63629e-12	4.79692e-08	-2.88478
rs2814778	11721931_s_at	TMCC2	-7.18552	1.64495e-12	4.81042e-08	-0.565181
rs2814778	11728942_s_at	CCNDBP1	-7.17938	1.71543e-12	5.00417e-08	-0.410479
rs75265799	11735672_a_at	FAM183BP	-7.17824	1.72888e-12	5.031e-08	-0.729863
rs75540417	11741468_a_at	SOX6	-7.17759	1.73656e-12	5.03585e-08	-1.41689
rs2814778	11728715_at	CXCL5	-7.17738	1.73905e-12	5.03585e-08	-0.613127
rs2814778	11730832_at	RANBP10	-7.17637	1.7511e-12	5.05837e-08	-0.375278
rs2814778	11736462_a_at	LILRA2	7.17542	1.76249e-12	5.07293e-08	0.315867
rs2814778	11740680_s_at	NA	-7.17524	1.7647e-12	5.07293e-08	-0.726924
rs2814778	11757055_x_at	SH3BP5L	7.17086	1.8183e-12	5.21183e-08	0.240251
rs2814778	11736836_at	TPCN2	7.17057	1.82182e-12	5.21183e-08	0.28157
rs2814778	11758104_s_at	RAB2B	-7.1699	1.83021e-12	5.22322e-08	-0.398082
rs115619982	11745689_a_at	CMPK2	-7.16518	1.89008e-12	5.3811e-08	-2.03557
rs2814778	11761270_a_at	CARS2	7.16394	1.90623e-12	5.41406e-08	0.362661
rs117019330	11715440_a_at	CTGF	-7.16217	1.92929e-12	5.46645e-08	-0.374
rs7528331	11717123_a_at	PPP1R12B	7.15777	1.98804e-12	5.61947e-08	0.450578
rs2814778	11729677_a_at	SLC26A8	7.15675	2.00204e-12	5.64556e-08	0.573738
rs2814778	11746951_a_at	REXO2	-7.14784	2.12723e-12	5.98436e-08	-0.265606
rs17056310	11729473_at	FANCA	-7.14659	2.14546e-12	6.02134e-08	-0.967844
rs75990347	11733727_s_at	SNAP25	-7.14581	2.15684e-12	6.03896e-08	-0.671712
rs2814778	11736395_a_at	BPGM	-7.14537	2.16336e-12	6.04293e-08	-0.728739
rs7528331	11763149_a_at	GYPB	-7.1443	2.17916e-12	6.07273e-08	-0.333681
rs2814778	11729289_a_at	BMX	7.14346	2.19168e-12	6.09329e-08	0.564465
rs189740529	11742494_s_at	NA	-7.13995	2.24462e-12	6.22587e-08	-1.09645
rs2814778	11736608_a_at	TGM3	7.13345	2.34601e-12	6.49188e-08	0.522996
rs2814778	11747125_a_at	RIOK3	-7.12944	2.41095e-12	6.65602e-08	-0.514295
rs2814778	11735856_s_at	GYPE	-7.11868	2.59375e-12	7.14403e-08	-0.505929
rs3799468	11727148_s_at	ZNF564	-7.11712	2.62119e-12	7.20287e-08	-1.19318
rs117179287	11727148_s_at	ZNF564	-7.11072	2.7376e-12	7.50536e-08	-0.924708
rs2814778	11730843_a_at	MXI1	-7.10873	2.77467e-12	7.58941e-08	-0.564976
rs2814778	11728669_a_at	UBE2H	-7.1054	2.83813e-12	7.7451e-08	-0.369747
rs2814778	11737423_a_at	NLRP1	7.10288	2.88684e-12	7.85992e-08	0.196385
rs2814778	11719392_a_at	RNF14	-7.10243	2.89579e-12	7.86619e-08	-0.454055
rs115156754	11729472_a_at	FANCA	-7.09975	2.94876e-12	7.99176e-08	-0.665649
rs9900782	11727404_a_at	GPC4	-7.09144	3.11929e-12	8.43463e-08	-1.25487
rs2814778	11725990_a_at	MARK3	-7.09043	3.14081e-12	8.47347e-08	-0.207629
rs115156754	11744117_at	THSD7A	-7.08897	3.17185e-12	8.53776e-08	-0.951155
rs2814778	11749618_x_at	LILRA2	7.08777	3.19774e-12	8.58795e-08	0.336461
rs115619982	11720606_a_at	SFRP2	-7.08656	3.22413e-12	8.63924e-08	-1.81448
rs115619982	11719365_x_at	SPATS2L	-7.08537	3.25019e-12	8.68938e-08	-2.4424
rs117331810	11756956_a_at	SPEF1	-7.07695	3.44043e-12	9.01485e-08	-1.1973
rs9839996	11756956_a_at	SPEF1	-7.07695	3.44043e-12	9.01485e-08	-1.1973
rs76089552	11756956_a_at	SPEF1	-7.07695	3.44043e-12	9.01485e-08	-1.1973
rs201877628	11756956_a_at	SPEF1	-7.07695	3.44043e-12	9.01485e-08	-1.1973
rs76713772	11756956_a_at	SPEF1	-7.07695	3.44043e-12	9.01485e-08	-1.1973
rs114450321	11756956_a_at	SPEF1	-7.07695	3.44043e-12	9.01485e-08	-1.1973
rs116226558	11756956_a_at	SPEF1	-7.07695	3.44043e-12	9.01485e-08	-1.1973
rs76406842	11756956_a_at	SPEF1	-7.07695	3.44043e-12	9.01485e-08	-1.1973
rs9984933	11756956_a_at	SPEF1	-7.07695	3.44043e-12	9.01485e-08	-1.1973
rs9603820	11720894_a_at	SOS1	-7.07654	3.44981e-12	9.01947e-08	-0.586509
rs115515568	11756956_a_at	SPEF1	-7.07614	3.45924e-12	9.02422e-08	-1.19717
rs2814778	11717157_a_at	ACP1	-7.07575	3.46834e-12	9.02807e-08	-0.291155
rs75135281	11756956_a_at	SPEF1	-7.07263	3.54226e-12	9.20025e-08	-1.19661
rs117019330	11736423_a_at	POSTN	-7.06584	3.70828e-12	9.61039e-08	-0.425111
rs75540417	11733432_at	AK7	-7.0633	3.77242e-12	9.75525e-08	-0.573852
rs76465000	11719365_x_at	SPATS2L	-7.06102	3.8308e-12	9.87528e-08	-3.44065
rs2814778	11756446_a_at	PITHD1	-7.06012	3.85401e-12	9.87528e-08	-0.483173
rs77001965	11719365_x_at	SPATS2L	-7.05869	3.89126e-12	9.87528e-08	-3.43957
rs73145075	11719365_x_at	SPATS2L	-7.05836	3.90001e-12	9.87528e-08	-3.43942
rs114628552	11719365_x_at	SPATS2L	-7.05787	3.91303e-12	9.87528e-08	-3.4392
rs2814778	11756056_a_at	SLC2A1	-7.0577	3.91734e-12	9.87528e-08	-0.352561
rs115754734	11719365_x_at	SPATS2L	-7.05765	3.91884e-12	9.87528e-08	-3.43909
rs116832035	11719365_x_at	SPATS2L	-7.05733	3.92722e-12	9.87528e-08	-3.43894
rs114216342	11719365_x_at	SPATS2L	-7.05733	3.92722e-12	9.87528e-08	-3.43894
rs73633773	11719365_x_at	SPATS2L	-7.05733	3.92722e-12	9.87528e-08	-3.43894
rs17083871	11719365_x_at	SPATS2L	-7.05733	3.92722e-12	9.87528e-08	-3.43894
rs79598670	11719365_x_at	SPATS2L	-7.05733	3.92722e-12	9.87528e-08	-3.43894
rs185302072	11719365_x_at	SPATS2L	-7.05733	3.92722e-12	9.87528e-08	-3.43894
rs79225353	11719365_x_at	SPATS2L	-7.05648	3.94977e-12	9.91092e-08	-3.43856
rs55997566	11719365_x_at	SPATS2L	-7.05545	3.97723e-12	9.95872e-08	-3.4381
rs61744238	11719365_x_at	SPATS2L	-7.05485	3.99337e-12	9.97805e-08	-3.43792
rs76465000	11723700_at	OAS3	-7.05342	4.03196e-12	1.00533e-07	-1.34818
rs2814778	11763422_a_at	ATP6V0D1	7.05263	4.05342e-12	1.00629e-07	0.219091
rs2814778	11749317_a_at	ATP6V0D1	7.05239	4.06013e-12	1.00629e-07	0.242533
rs113239743	11733412_a_at	ZC4H2	-7.0523	4.06261e-12	1.00629e-07	-2.24977
rs113239743	11720605_a_at	POLD2	-7.05189	4.07367e-12	1.00629e-07	-1.73578
rs117019330	11736422_s_at	POSTN	-7.05172	4.07831e-12	1.00629e-07	-0.468134
rs55997566	11723700_at	OAS3	-7.04757	4.19391e-12	1.02935e-07	-1.34713
rs2814778	11728695_at	ARG2	-7.04696	4.21127e-12	1.02935e-07	-0.279996
rs61744238	11723700_at	OAS3	-7.04671	4.21827e-12	1.02935e-07	-1.34702
rs115754734	11723700_at	OAS3	-7.04629	4.23014e-12	1.02935e-07	-1.3469
rs116832035	11723700_at	OAS3	-7.04529	4.2587e-12	1.02935e-07	-1.34672
rs114216342	11723700_at	OAS3	-7.04529	4.2587e-12	1.02935e-07	-1.34672
rs73633773	11723700_at	OAS3	-7.04529	4.2587e-12	1.02935e-07	-1.34672
rs17083871	11723700_at	OAS3	-7.04529	4.2587e-12	1.02935e-07	-1.34672
rs79598670	11723700_at	OAS3	-7.04529	4.2587e-12	1.02935e-07	-1.34672
rs185302072	11723700_at	OAS3	-7.04529	4.2587e-12	1.02935e-07	-1.34672
rs77001965	11723700_at	OAS3	-7.04434	4.28622e-12	1.03366e-07	-1.34655
rs73145075	11723700_at	OAS3	-7.04407	4.29397e-12	1.03366e-07	-1.3465
rs79225353	11723700_at	OAS3	-7.04351	4.31013e-12	1.03433e-07	-1.3464
rs114628552	11723700_at	OAS3	-7.04337	4.31421e-12	1.03433e-07	-1.34638
rs17172670	11762572_x_at	MTHFD2L	-7.03693	4.50498e-12	1.07788e-07	-0.776265
rs9603820	11763252_x_at	PSPH	-7.03646	4.51929e-12	1.07913e-07	-0.765266
rs2814778	11717153_a_at	APMAP	7.03439	4.58275e-12	1.09208e-07	0.167416
rs2814778	11755643_a_at	TNS3	7.03026	4.71166e-12	1.12055e-07	0.269174
rs2814778	11717878_x_at	PPFIA1	7.02851	4.76725e-12	1.13149e-07	0.225153
rs9603820	11743928_at	NSUN3	-7.02804	4.7823e-12	1.1328e-07	-0.493593
rs2814778	11758328_s_at	NCOA3	7.02316	4.94145e-12	1.16816e-07	0.282243
rs2814778	11743068_at	SIAH2	-7.02188	4.98399e-12	1.17587e-07	-0.364977
rs75540417	11742472_a_at	NA	-7.01721	5.14274e-12	1.21091e-07	-1.16781
rs115619982	11734785_at	CLIC2	-7.0151	5.21606e-12	1.22573e-07	-1.54848
rs2814778	11734345_a_at	TRIM10	-7.01141	5.3467e-12	1.25395e-07	-0.597989
rs9603820	11735040_at	RPL3L	-7.0103	5.38646e-12	1.26077e-07	-0.320884
rs9603820	11759103_at	CYP4F3	7.00952	5.41488e-12	1.26333e-07	0.566737
rs2814778	11752892_x_at	LILRA2	7.00941	5.4187e-12	1.26333e-07	0.277946
rs2814778	11739230_a_at	ARL4A	-7.00893	5.43612e-12	1.2649e-07	-0.33073
rs2814778	11759419_at	GTF2H3	-6.99906	5.80757e-12	1.34868e-07	-0.312154
rs2814778	11750308_s_at	APMAP	6.99776	5.85832e-12	1.3578e-07	0.28233
rs2814778	11721929_x_at	TMCC2	-6.98923	6.20202e-12	1.43466e-07	-0.29235
rs115619982	11760252_at	IFI44	-6.9888	6.21979e-12	1.43596e-07	-4.18288
rs2814778	11728838_a_at	TMCC3	6.98771	6.26526e-12	1.44364e-07	0.284092
rs2814778	11746522_s_at	NA	-6.97554	6.79565e-12	1.56282e-07	-0.413331
rs2814778	11758338_s_at	CRISPLD2	6.97324	6.90104e-12	1.58398e-07	0.41434
rs2814778	11739061_at	SLC7A5	-6.96569	7.25706e-12	1.66247e-07	-0.405888
rs9900782	11733635_at	FAM92B	-6.95724	7.67718e-12	1.75532e-07	-0.995432
rs76196708	11763130_x_at	NA	-6.95447	7.8203e-12	1.77986e-07	-1.33499
rs2814778	11729920_at	BBOF1	-6.95436	7.82597e-12	1.77986e-07	-0.804767
rs2814778	11719581_a_at	BPGM	-6.95429	7.82958e-12	1.77986e-07	-0.704606
rs75990347	11756956_a_at	SPEF1	-6.95357	7.86736e-12	1.78502e-07	-0.833341
rs77108619	11742205_a_at	CCDC68	-6.95201	7.9492e-12	1.80014e-07	-0.361219
rs2814778	11755072_a_at	ICAM3	6.94939	8.08932e-12	1.82837e-07	0.102964
rs9900782	11727403_at	GPC4	-6.94669	8.23542e-12	1.85785e-07	-2.74364
rs113239743	11715248_s_at	CRISP2	-6.94258	8.46384e-12	1.90575e-07	-1.70892
rs113239743	11756971_x_at	PKM	-6.94181	8.50718e-12	1.90902e-07	-1.64393
rs113239743	11754197_x_at	FAM120B	-6.94175	8.51059e-12	1.90902e-07	-1.17517
rs2814778	11719260_x_at	LMNA	-6.94033	8.59118e-12	1.92345e-07	-0.303222
rs75540417	11733727_s_at	SNAP25	-6.93499	8.90141e-12	1.98915e-07	-0.533638
rs2814778	11721817_a_at	SH3BP5L	6.93453	8.92877e-12	1.9915e-07	0.227222
rs116237994	11723246_s_at	SFRP1	-6.93372	8.97678e-12	1.99814e-07	-1.19216
rs2814778	11718222_s_at	GSPT1	-6.93346	8.99227e-12	1.99814e-07	-0.2524
rs16996942	11733432_at	AK7	-6.92965	9.2223e-12	2.04542e-07	-0.563667
rs2814778	11724380_a_at	NHSL1	6.92126	9.75042e-12	2.15567e-07	0.325965
rs115619982	11729631_x_at	AP3M1	6.92117	9.75579e-12	2.15567e-07	1.50944
rs113239743	11715471_a_at	SRPRA	-6.9198	9.84503e-12	2.17134e-07	-2.19015
rs2814778	11733863_a_at	NA	-6.91717	1.00179e-11	2.20536e-07	-0.351515
rs7528331	11728421_a_at	PLA2G7	6.91659	1.00563e-11	2.20971e-07	0.570465
rs7528331	11717136_x_at	PCSK1N	-6.91605	1.00925e-11	2.21356e-07	-0.44652
rs2814778	11758231_x_at	HLA-DPA1	6.91517	1.01515e-11	2.22238e-07	0.298444
rs2814778	11723031_a_at	CRISPLD2	6.91382	1.02432e-11	2.23831e-07	0.447815
rs2814778	11762622_at	FPR1	6.9106	1.04637e-11	2.28228e-07	0.38367
rs75411903	11739803_a_at	RASAL2	-6.91022	1.04896e-11	2.28373e-07	-0.908843
rs16996942	11716384_at	CCL2	-6.90572	1.08071e-11	2.34854e-07	-1.81447
rs2814778	11732863_at	OXER1	6.90189	1.10845e-11	2.4044e-07	0.360898
rs2814778	11763423_x_at	ATP6V0D1	6.89638	1.14951e-11	2.48892e-07	0.216505
rs113239743	11747498_s_at	SORD	-6.89282	1.17693e-11	2.54363e-07	-1.73636
rs16996942	11761793_a_at	FAM122C	-6.89084	1.19238e-11	2.57233e-07	-0.571231
rs2814778	11733297_at	CYP4F3	6.88989	1.19994e-11	2.58394e-07	0.544885
rs2814778	11727808_s_at	FECH	-6.88613	1.23004e-11	2.63836e-07	-0.697501
rs2814778	11719777_at	NDST1	6.88605	1.23068e-11	2.63836e-07	0.377209
rs2814778	11743755_s_at	ZFAND5	-6.8859	1.2319e-11	2.63836e-07	-0.197146
rs2814778	11723849_a_at	MS4A6A	6.88455	1.24292e-11	2.65344e-07	0.248261
rs78571577	11744613_a_at	SLC6A13	-6.88449	1.24342e-11	2.65344e-07	-0.881095
rs114699955	11733432_at	AK7	-6.88313	1.2547e-11	2.67269e-07	-0.4854
rs200653222	11715248_s_at	CRISP2	-6.87969	1.28342e-11	2.72895e-07	-1.69438
rs2814778	11733296_s_at	NA	6.87836	1.29478e-11	2.74818e-07	0.397838
rs80287706	11716384_at	CCL2	-6.87712	1.30537e-11	2.76571e-07	-2.21211
rs200385090	11716384_at	CCL2	-6.87668	1.30915e-11	2.76877e-07	-2.21198
rs2814778	11739338_at	TENT5C	-6.87233	1.3473e-11	2.84437e-07	-0.688727
rs9603820	11721930_a_at	TMCC2	-6.86673	1.39785e-11	2.93942e-07	-0.619636
rs7528331	11743928_at	NSUN3	-6.86655	1.39955e-11	2.93942e-07	-0.396567
rs78571577	11728685_at	FAM83A	-6.86653	1.39977e-11	2.93942e-07	-1.27741
rs73116023	11758619_s_at	LIF	-6.86222	1.44002e-11	3.01859e-07	-0.745568
rs1378833	11754138_s_at	PSPH	-6.86174	1.44456e-11	3.02276e-07	-1.21554
rs78571577	11764077_s_at	EDIL3	-6.85962	1.46482e-11	3.05975e-07	-1.09762
rs117179287	11725105_a_at	RAI2	-6.85659	1.49431e-11	3.11585e-07	-1.29001
rs2814778	11763808_x_at	ATP6V0D1	6.85308	1.52926e-11	3.18313e-07	0.209395
rs74556234	11728121_a_at	ADGRG2	-6.85259	1.53421e-11	3.18782e-07	-0.898666
rs9603820	11754138_s_at	PSPH	-6.84871	1.57376e-11	3.26428e-07	-1.84128
rs78571577	11755833_a_at	GRM8	-6.84658	1.59592e-11	3.30445e-07	-0.474883
rs2814778	11742714_a_at	TBRG1	6.84399	1.62334e-11	3.35536e-07	0.216993
rs7528331	11734144_s_at	NA	6.84319	1.63185e-11	3.36157e-07	0.512456
rs2814778	11718543_at	ZBTB44	-6.84318	1.63202e-11	3.36157e-07	-0.328138
rs2814778	11715752_at	TSPAN7	-6.8409	1.65664e-11	3.40636e-07	-0.45898
rs2814778	11729032_a_at	RPGRIP1	6.83966	1.67014e-11	3.42817e-07	0.403877
rs2814778	11748523_a_at	PCGF5	-6.83674	1.70248e-11	3.47855e-07	-0.388004
rs2814778	11731271_a_at	MGAM	6.83665	1.70342e-11	3.47855e-07	0.325834
rs117153530	11725494_at	RSPH9	-6.83665	1.7035e-11	3.47855e-07	-2.9847
rs2814778	11728716_x_at	CXCL5	-6.83556	1.71568e-11	3.49368e-07	-0.606155
rs12686385	11716384_at	CCL2	-6.83524	1.71933e-11	3.49368e-07	-2.19944
rs75537281	11716384_at	CCL2	-6.8352	1.71976e-11	3.49368e-07	-2.19943
rs115619982	200023_PM_s_at	EIF3F	6.83317	1.74274e-11	3.5343e-07	0.704183
rs2814778	11736120_s_at	ZFAND5	-6.83245	1.75102e-11	3.54503e-07	-0.226391
rs9603820	11717123_a_at	PPP1R12B	6.83079	1.77024e-11	3.57783e-07	0.525178
rs75540417	11745300_a_at	DNAJC6	-6.82755	1.80819e-11	3.64829e-07	-2.47423
rs115619982	11757331_x_at	NA	6.82681	1.81697e-11	3.65977e-07	0.325798
rs2814778	11721954_s_at	RNF41	6.82247	1.86937e-11	3.73158e-07	0.165486
rs117189591	11732712_a_at	FST	-6.8222	1.8727e-11	3.73158e-07	-2.2
rs116087048	11732712_a_at	FST	-6.82127	1.88412e-11	3.73158e-07	-2.19971
rs74395607	11732712_a_at	FST	-6.82127	1.88412e-11	3.73158e-07	-2.19971
rs202224378	11732712_a_at	FST	-6.82127	1.88412e-11	3.73158e-07	-2.19971
rs117493280	11732712_a_at	FST	-6.82127	1.88412e-11	3.73158e-07	-2.19971
rs12340865	11732712_a_at	FST	-6.82127	1.88412e-11	3.73158e-07	-2.19971
rs116461055	11732712_a_at	FST	-6.82127	1.88412e-11	3.73158e-07	-2.19971
rs199849618	11732712_a_at	FST	-6.82127	1.88412e-11	3.73158e-07	-2.19971
rs57827007	11732712_a_at	FST	-6.82127	1.88412e-11	3.73158e-07	-2.19971
rs11570112	11732712_a_at	FST	-6.8193	1.90851e-11	3.77357e-07	-2.19912
rs2814778	11715796_s_at	LUM	-6.81469	1.96702e-11	3.88277e-07	-0.236266
rs2814778	11736101_at	MAN1A1	-6.81334	1.98452e-11	3.91079e-07	-0.470034
rs9603820	11733767_a_at	LILRA2	6.80756	2.06099e-11	4.05474e-07	0.244187
rs16996942	11741468_a_at	SOX6	-6.80592	2.08313e-11	4.0915e-07	-1.34798
rs2814778	11717877_a_at	PPFIA1	6.80161	2.14264e-11	4.20143e-07	0.206977
rs75540417	11745939_a_at	DNAJC6	-6.79882	2.18197e-11	4.27148e-07	-0.708563
rs7528331	11731781_x_at	GSTA3	-6.79776	2.19722e-11	4.29422e-07	-0.136443
rs115619982	11718275_x_at	EIF3L	6.79658	2.21416e-11	4.3202e-07	0.701959
rs2814778	11741978_s_at	NA	-6.79628	2.21857e-11	4.3217e-07	-0.441448
rs75540417	11748139_a_at	RNF14	-6.79502	2.2369e-11	4.35025e-07	-1.57535
rs2814778	11754990_a_at	EPB41	-6.79255	2.27311e-11	4.41342e-07	-0.208683
rs79112113	11727796_a_at	NDFIP2	-6.79032	2.30647e-11	4.47086e-07	-0.656051
rs2814778	11740396_a_at	NLRP12	6.77842	2.49256e-11	4.82368e-07	0.250531
rs117980903	11716384_at	CCL2	-6.77732	2.51051e-11	4.8505e-07	-1.78273
rs2814778	11729940_x_at	TMEM56	-6.77408	2.56392e-11	4.94561e-07	-0.58987
rs17056310	11729474_x_at	FANCA	-6.76586	2.70479e-11	5.20886e-07	-0.893839
rs2814778	11717152_x_at	APMAP	6.7653	2.71475e-11	5.21956e-07	0.225737
rs9603820	11760063_x_at	CCL4L2	-6.76456	2.72772e-11	5.23358e-07	-0.630192
rs2814778	11722971_a_at	NA	6.76429	2.73255e-11	5.23358e-07	0.229964
rs2814778	11743342_a_at	RMND5A	-6.76414	2.7353e-11	5.23358e-07	-0.260776
rs2814778	11725611_a_at	TMEM200B	-6.7622	2.76987e-11	5.29118e-07	-0.208597
rs2814778	11757871_s_at	PBX1	-6.76071	2.79686e-11	5.33413e-07	-0.639362
rs2814778	11746494_x_at	PIP4K2A	-6.75841	2.83894e-11	5.40568e-07	-0.459239
rs75540417	11728821_a_at	HEPACAM2	-6.75711	2.86313e-11	5.44298e-07	-1.79519
rs17056310	11762506_at	PP2672	-6.75569	2.88958e-11	5.48446e-07	-0.72842
rs2814778	11737454_x_at	ZNF763	6.75442	2.91349e-11	5.521e-07	0.230397
rs2814778	11724538_a_at	ABCG2	-6.7512	2.97518e-11	5.6289e-07	-0.688492
rs2814778	11721673_at	GLRX5	-6.75007	2.99691e-11	5.66097e-07	-0.480881
rs2814778	11742896_s_at	H2AFY	6.74628	3.07156e-11	5.79274e-07	0.155396
rs2814778	11737326_a_at	SLC6A9	-6.74504	3.09648e-11	5.83044e-07	-0.683963
rs75540417	11733100_at	USP12	-6.74381	3.12115e-11	5.86756e-07	-1.90317
rs10487776	11733432_at	AK7	-6.74354	3.12664e-11	5.86858e-07	-0.549419
rs113239743	11758996_at	FAM120A	-6.74207	3.15663e-11	5.91089e-07	-2.01937
rs2814778	11739348_at	PIP4K2A	-6.74195	3.15916e-11	5.91089e-07	-0.178346
rs7528331	11742144_x_at	NA	-6.74044	3.19012e-11	5.95939e-07	-0.504573
rs2814778	11715792_a_at	STOM	-6.73948	3.21e-11	5.98709e-07	-0.35028
rs2814778	11759404_at	TSPAN5	-6.72491	3.52768e-11	6.56926e-07	-0.53901
rs2814778	11738053_x_at	PLAUR	6.72429	3.54197e-11	6.58551e-07	0.250152
rs113239743	11758886_at	RHBDD1	-6.72126	3.6121e-11	6.70537e-07	-1.40814
rs2814778	11721675_x_at	GLRX5	-6.71952	3.65292e-11	6.77055e-07	-0.480644
rs116237994	11715248_s_at	CRISP2	-6.71904	3.66412e-11	6.7807e-07	-1.35396
rs2814778	11724994_at	RFLNB	6.71866	3.67322e-11	6.78692e-07	0.374384
rs2814778	11733029_x_at	AIDA	-6.71816	3.68514e-11	6.79835e-07	-0.287877
rs2814778	11756387_x_at	ARL4A	-6.71762	3.69812e-11	6.81168e-07	-0.331156
rs2814778	11750456_s_at	NA	-6.71373	3.79218e-11	6.97409e-07	-0.745293
rs2814778	11751335_a_at	MKRN1	-6.71299	3.81033e-11	6.99661e-07	-0.513164
rs2814778	11721674_s_at	GLRX5	-6.71263	3.81927e-11	7.00217e-07	-0.379269
rs2814778	11737138_a_at	UBQLN1	-6.71044	3.87369e-11	7.09096e-07	-0.204092
rs2814778	11716784_at	TRAK2	-6.7095	3.89725e-11	7.12308e-07	-0.371059
rs75540417	11751489_a_at	TSPAN7	-6.70919	3.90509e-11	7.12641e-07	-1.06468
rs2814778	11721656_s_at	CISD2	-6.70826	3.92848e-11	7.15807e-07	-0.34161
rs2814778	11727964_x_at	CYP4F2	6.70621	3.98083e-11	7.24231e-07	0.277511
rs2814778	11717517_s_at	REXO2	-6.70123	4.11087e-11	7.46741e-07	-0.182684
rs75540417	11715796_s_at	LUM	-6.70028	4.13597e-11	7.50152e-07	-1.2923
rs78571577	11753207_a_at	MOB1B	-6.69802	4.19684e-11	7.60028e-07	-1.51613
rs2814778	11758611_s_at	TRIM10	-6.69724	4.21788e-11	7.6267e-07	-0.728246
rs2814778	11760057_at	MICAL3	-6.69634	4.24246e-11	7.65946e-07	-0.319405
rs2814778	11749617_a_at	LILRA2	6.69563	4.26201e-11	7.68305e-07	0.34428
rs9603820	11725950_s_at	RIOK3	-6.69494	4.28098e-11	7.70551e-07	-0.544557
rs2814778	11721609_a_at	PABPC1L	6.69425	4.30006e-11	7.72811e-07	0.272779
rs2814778	11742798_a_at	CLCN3	-6.69132	4.38216e-11	7.86374e-07	-0.289867
rs75540417	11737177_at	SLC25A21	-6.68726	4.49812e-11	8.05961e-07	-0.4988
rs2814778	11718400_a_at	PNP	-6.68633	4.52529e-11	8.09603e-07	-0.215092
rs2814778	11718617_a_at	DNAJA4	-6.68574	4.54222e-11	8.11408e-07	-0.381711
rs78571577	11736797_s_at	RUNX1T1	-6.68277	4.63007e-11	8.25856e-07	-1.30163
rs115600982	11752859_a_at	ABHD6	-6.68253	4.63722e-11	8.25887e-07	-0.832862
rs7528331	11733767_a_at	LILRA2	6.68176	4.66008e-11	8.28712e-07	0.197023
rs2814778	11758622_s_at	MXRA7	-6.68001	4.71306e-11	8.36877e-07	-0.528645
rs115619982	11729571_a_at	FAM83A	-6.67934	4.73327e-11	8.39207e-07	-3.15817
rs2814778	11744722_x_at	RHD	-6.67788	4.77793e-11	8.45859e-07	-0.440233
rs2814778	11743338_at	MEGF9	6.67761	4.78636e-11	8.46087e-07	0.181798
rs2814778	11728671_s_at	UBE2H	-6.67631	4.82659e-11	8.51928e-07	-0.336104
rs79225353	11751677_a_at	CLDN18	-6.67424	4.89101e-11	8.57759e-07	-1.17598
rs114628552	11751677_a_at	CLDN18	-6.67408	4.89612e-11	8.57759e-07	-1.17596
rs73145075	11751677_a_at	CLDN18	-6.67345	4.916e-11	8.57759e-07	-1.17585
rs75540417	11731442_at	ARHGEF12	-6.67307	4.92793e-11	8.57759e-07	-2.35567
rs116832035	11751677_a_at	CLDN18	-6.67294	4.93205e-11	8.57759e-07	-1.17577
rs114216342	11751677_a_at	CLDN18	-6.67294	4.93205e-11	8.57759e-07	-1.17577
rs73633773	11751677_a_at	CLDN18	-6.67294	4.93205e-11	8.57759e-07	-1.17577
rs17083871	11751677_a_at	CLDN18	-6.67294	4.93205e-11	8.57759e-07	-1.17577
rs79598670	11751677_a_at	CLDN18	-6.67294	4.93205e-11	8.57759e-07	-1.17577
rs185302072	11751677_a_at	CLDN18	-6.67294	4.93205e-11	8.57759e-07	-1.17577
rs55997566	11751677_a_at	CLDN18	-6.67212	4.9584e-11	8.58327e-07	-1.17563
rs78571577	11737831_a_at	FNBP1L	-6.67205	4.96049e-11	8.58327e-07	-1.26906
rs77001965	11751677_a_at	CLDN18	-6.67203	4.96118e-11	8.58327e-07	-1.17561
rs115754734	11751677_a_at	CLDN18	-6.67193	4.96431e-11	8.58327e-07	-1.1756
rs75540417	11741315_a_at	PLSCR4	-6.67165	4.97315e-11	8.58601e-07	-1.48272
rs79019613	11729125_s_at	RCN2	-6.6686	5.0716e-11	8.74325e-07	-0.28987
rs76465000	11751677_a_at	CLDN18	-6.66812	5.0874e-11	8.75773e-07	-1.17497
rs2814778	11731134_a_at	LTB4R	6.66766	5.10248e-11	8.77094e-07	0.339811
rs2814778	11744300_at	CHST15	6.66707	5.1217e-11	8.79122e-07	0.237568
rs9812589	11760063_x_at	CCL4L2	-6.66497	5.19133e-11	8.89786e-07	-0.467543
rs2814778	11726409_a_at	GID4	-6.66389	5.22742e-11	8.94675e-07	-0.286392
rs61744238	11751677_a_at	CLDN18	-6.66235	5.27925e-11	9.02243e-07	-1.17404
rs2814778	11718347_a_at	S100P	6.65967	5.3708e-11	9.16567e-07	0.583483
rs2814778	11752913_a_at	SESN3	-6.65845	5.41302e-11	9.22442e-07	-0.532233
rs2814778	11753894_a_at	CNPPD1	-6.65703	5.46262e-11	9.29557e-07	-0.248841
rs2814778	11721418_at	SH3RF3	6.6521	5.63817e-11	9.58053e-07	0.45254
rs2814778	11745141_a_at	PADI2	6.64686	5.83053e-11	9.8932e-07	0.41613
rs7528331	11727597_at	PADI2	6.64636	5.8496e-11	9.91136e-07	0.290711
rs77108619	11741468_a_at	SOX6	-6.64548	5.88242e-11	9.95273e-07	-0.933885
rs2814778	11718839_a_at	MON1B	6.64473	5.91095e-11	9.98674e-07	0.295865
rs9603820	11759419_at	GTF2H3	-6.64438	5.92389e-11	9.99435e-07	-0.457618
rs2814778	11725951_at	RIOK3	-6.64367	5.95105e-11	1.00259e-06	-0.488432
rs78571577	11741544_at	SLFN14	-6.64066	6.06703e-11	1.02068e-06	-0.768279
rs75540417	11729942_at	TMEM56	-6.63812	6.16613e-11	1.03588e-06	-1.61783
rs9603820	11758328_s_at	NCOA3	6.63613	6.24519e-11	1.04767e-06	0.411954
rs9603820	11756238_s_at	SLC2A1	-6.63537	6.27586e-11	1.05133e-06	-0.359993
rs2814778	11736205_a_at	OSBP2	-6.63434	6.31719e-11	1.05676e-06	-0.640974
rs2814778	11757341_s_at	OPTN	-6.63409	6.32726e-11	1.05695e-06	-0.40752
rs114191746	11742701_x_at	C1R	-6.63229	6.40072e-11	1.06771e-06	-0.672919
rs9603820	11728879_at	PPP3R1	-6.63165	6.42679e-11	1.07055e-06	-0.503123
rs10487776	11728685_at	FAM83A	-6.62797	6.57965e-11	1.09448e-06	-1.23557
rs2814778	11716810_a_at	SIN3B	6.62694	6.62315e-11	1.10017e-06	0.22574
rs73615423	11716384_at	CCL2	-6.62537	6.68998e-11	1.10971e-06	-2.13577
rs78571577	11752478_a_at	SLC6A13	-6.6251	6.70148e-11	1.11007e-06	-0.701333
rs2814778	11726337_a_at	ALOX5	6.61935	6.95212e-11	1.14832e-06	0.244683
rs117153530	11724291_a_at	TRIT1	6.61922	6.95811e-11	1.14832e-06	1.66489
rs115619982	11719364_a_at	SPATS2L	-6.61914	6.96148e-11	1.14832e-06	-3.21133
rs2814778	11754422_a_at	CARS2	6.61883	6.97521e-11	1.14898e-06	0.222922
rs115619982	11737831_a_at	FNBP1L	-6.6183	6.99907e-11	1.15039e-06	-1.54142
rs113239743	11726696_x_at	ZBTB7A	-6.61821	7.00319e-11	1.15039e-06	-1.0406
rs2814778	11716811_s_at	SIN3B	6.61787	7.01842e-11	1.1513e-06	0.217767
rs9603820	11721928_a_at	TMCC2	-6.61513	7.14216e-11	1.16997e-06	-0.5237
rs2814778	11752626_a_at	PBX1	-6.61248	7.26398e-11	1.18829e-06	-0.495026
rs2814778	11751336_x_at	MKRN1	-6.6122	7.27661e-11	1.18871e-06	-0.467369
rs2814778	11724284_at	FRMD4A	-6.61103	7.33137e-11	1.19601e-06	-0.415206
rs2814778	11724079_s_at	E2F2	-6.60792	7.47833e-11	1.2183e-06	-0.453583
rs115619982	11759164_at	CASTOR2	-6.60223	7.75404e-11	1.26148e-06	-1.05486
rs78571577	11761793_a_at	FAM122C	-6.59808	7.9618e-11	1.2935e-06	-0.548344
rs115619982	11746778_a_at	ITSN1	-6.59768	7.98212e-11	1.29503e-06	-1.3346
rs2814778	11736175_a_at	ARPIN	6.59693	8.0204e-11	1.298e-06	0.251163
rs2814778	11758331_s_at	NA	6.59689	8.02235e-11	1.298e-06	0.569253
rs115156754	11743221_at	GPR141	-6.59626	8.05475e-11	1.30147e-06	-1.21852
rs115619982	11734518_at	PAGE2	-6.59333	8.20646e-11	1.32417e-06	-0.743457
rs9603820	11731135_a_at	LTB4R	6.59218	8.26657e-11	1.33206e-06	0.475698
rs113239743	11755168_x_at	CENPL	-6.59189	8.28164e-11	1.33267e-06	-1.52358
rs115515568	11763132_x_at	IGKC	-6.59088	8.33522e-11	1.33947e-06	-1.92445
rs2814778	11758053_s_at	NCOA4	-6.59043	8.35916e-11	1.3415e-06	-0.343985
rs16996942	11741315_a_at	PLSCR4	-6.58746	8.51843e-11	1.35206e-06	-1.46506
rs117331810	11763132_x_at	IGKC	-6.58708	8.53911e-11	1.35206e-06	-1.9234
rs9839996	11763132_x_at	IGKC	-6.58708	8.53911e-11	1.35206e-06	-1.9234
rs76089552	11763132_x_at	IGKC	-6.58708	8.53911e-11	1.35206e-06	-1.9234
rs201877628	11763132_x_at	IGKC	-6.58708	8.53911e-11	1.35206e-06	-1.9234
rs76713772	11763132_x_at	IGKC	-6.58708	8.53911e-11	1.35206e-06	-1.9234
rs114450321	11763132_x_at	IGKC	-6.58708	8.53911e-11	1.35206e-06	-1.9234
rs116226558	11763132_x_at	IGKC	-6.58708	8.53911e-11	1.35206e-06	-1.9234
rs76406842	11763132_x_at	IGKC	-6.58708	8.53911e-11	1.35206e-06	-1.9234
rs9984933	11763132_x_at	IGKC	-6.58708	8.53911e-11	1.35206e-06	-1.9234
rs2814778	11740238_a_at	SULF2	6.58615	8.5898e-11	1.35827e-06	0.193547
rs75135281	11763132_x_at	IGKC	-6.58512	8.64632e-11	1.36538e-06	-1.92286
rs2814778	11742697_a_at	ITM2A	-6.58228	8.80346e-11	1.38835e-06	-0.305515
rs2814778	11731452_s_at	SEC62	-6.58016	8.92298e-11	1.40532e-06	-0.45586
rs76465000	11760253_x_at	IFI44	-6.57884	8.99814e-11	1.41372e-06	-4.40981
rs115274671	11728601_at	COX8C	-6.5788	9.00019e-11	1.41372e-06	-0.468507
rs2814778	11759824_a_at	LILRA1	6.57666	9.12317e-11	1.43114e-06	0.206393
rs2814778	11764167_at	LINC00570	-6.57618	9.15131e-11	1.43366e-06	-0.303963
rs77001965	11760253_x_at	IFI44	-6.57527	9.20424e-11	1.44005e-06	-4.40753
rs115754734	11760253_x_at	IFI44	-6.57349	9.30863e-11	1.44323e-06	-4.40641
rs115156754	11729473_at	FANCA	-6.57332	9.31912e-11	1.44323e-06	-0.800782
rs114628552	11760253_x_at	IFI44	-6.57324	9.32344e-11	1.44323e-06	-4.40625
rs116832035	11760253_x_at	IFI44	-6.57306	9.33429e-11	1.44323e-06	-4.40613
rs114216342	11760253_x_at	IFI44	-6.57306	9.33429e-11	1.44323e-06	-4.40613
rs73633773	11760253_x_at	IFI44	-6.57306	9.33429e-11	1.44323e-06	-4.40613
rs17083871	11760253_x_at	IFI44	-6.57306	9.33429e-11	1.44323e-06	-4.40613
rs79598670	11760253_x_at	IFI44	-6.57306	9.33429e-11	1.44323e-06	-4.40613
rs185302072	11760253_x_at	IFI44	-6.57306	9.33429e-11	1.44323e-06	-4.40613
rs79225353	11760253_x_at	IFI44	-6.57282	9.34852e-11	1.44355e-06	-4.40598
rs55997566	11760253_x_at	IFI44	-6.57234	9.37703e-11	1.44607e-06	-4.40569
rs2814778	11746013_s_at	NA	6.57135	9.4361e-11	1.4529e-06	0.337193
rs73145075	11760253_x_at	IFI44	-6.57112	9.45001e-11	1.4529e-06	-4.40491
rs2814778	11758070_s_at	PBX1	-6.57098	9.45816e-11	1.4529e-06	-0.559972
rs78571577	11734518_at	PAGE2	-6.56988	9.52426e-11	1.46116e-06	-0.605403
rs115619982	11718274_s_at	EIF3L	6.56872	9.59486e-11	1.47009e-06	0.758802
rs2814778	11749092_a_at	NLRX1	6.56614	9.75292e-11	1.48933e-06	0.295415
rs76700790	11715248_s_at	CRISP2	-6.56606	9.75816e-11	1.48933e-06	-0.639187
rs61744238	11760253_x_at	IFI44	-6.56606	9.75817e-11	1.48933e-06	-4.40184
rs2814778	11747693_a_at	MME	6.56487	9.83213e-11	1.49869e-06	0.379468
rs2814778	11725237_a_at	RBPMS2	-6.56426	9.87007e-11	1.50254e-06	-0.756782
rs10487776	11761793_a_at	FAM122C	-6.56397	9.88811e-11	1.50335e-06	-0.545667
rs78571577	11720057_a_at	POLR1D	-6.56227	9.99508e-11	1.51767e-06	-0.887325
rs2814778	11748139_a_at	RNF14	-6.5609	1.00823e-10	1.52768e-06	-0.274243
rs2814778	11759450_x_at	NA	-6.56083	1.00869e-10	1.52768e-06	-0.317076
rs2814778	11751625_a_at	DCUN1D1	-6.55878	1.02186e-10	1.54566e-06	-0.441531
rs115619982	11737857_a_at	DNAAF1	-6.55821	1.02559e-10	1.54933e-06	-1.47864
rs7528331	11726178_a_at	SOX6	-6.55777	1.02845e-10	1.55166e-06	-0.527163
rs9812589	11743089_a_at	LRRC6	6.55735	1.03116e-10	1.55377e-06	0.648185
rs78571577	11720606_a_at	SFRP2	-6.55402	1.05315e-10	1.58489e-06	-1.37749
rs2814778	11728950_at	LSMEM2	-6.55117	1.07231e-10	1.61168e-06	-0.18788
rs2814778	11763691_at	VTI1B	-6.55006	1.07988e-10	1.62101e-06	-0.280029
rs77108619	11740095_a_at	LRRC2	-6.54716	1.09985e-10	1.64888e-06	-0.525751
rs2814778	11720530_at	JAZF1	-6.54334	1.12678e-10	1.68712e-06	-0.375639
rs7528331	11733768_x_at	LILRA2	6.54314	1.12822e-10	1.68714e-06	0.223845
rs113239743	11716799_at	FADD	-6.54122	1.14196e-10	1.70555e-06	-1.3134
rs76056273	11716384_at	CCL2	-6.54003	1.15062e-10	1.71631e-06	-2.10978
rs9603820	11722681_at	RBP7	6.53911	1.15732e-10	1.71767e-06	0.418605
rs117331810	11754855_a_at	MOBP	-6.53792	1.16604e-10	1.71767e-06	-1.38672
rs9839996	11754855_a_at	MOBP	-6.53792	1.16604e-10	1.71767e-06	-1.38672
rs76089552	11754855_a_at	MOBP	-6.53792	1.16604e-10	1.71767e-06	-1.38672
rs201877628	11754855_a_at	MOBP	-6.53792	1.16604e-10	1.71767e-06	-1.38672
rs76713772	11754855_a_at	MOBP	-6.53792	1.16604e-10	1.71767e-06	-1.38672
rs114450321	11754855_a_at	MOBP	-6.53792	1.16604e-10	1.71767e-06	-1.38672
rs116226558	11754855_a_at	MOBP	-6.53792	1.16604e-10	1.71767e-06	-1.38672
rs76406842	11754855_a_at	MOBP	-6.53792	1.16604e-10	1.71767e-06	-1.38672
rs9984933	11754855_a_at	MOBP	-6.53792	1.16604e-10	1.71767e-06	-1.38672
rs2814778	11723252_a_at	SERPINC1	-6.53755	1.16876e-10	1.71896e-06	-0.166148
rs75135281	11754855_a_at	MOBP	-6.53741	1.16981e-10	1.71896e-06	-1.38662
rs115515568	11754855_a_at	MOBP	-6.53666	1.17534e-10	1.72495e-06	-1.38647
rs6077266	11723246_s_at	SFRP1	-6.53646	1.17681e-10	1.72496e-06	-1.38022
rs2814778	11758447_s_at	NUP50	6.53474	1.18966e-10	1.74163e-06	0.184485
rs115619982	11757296_s_at	EIF3F	6.5338	1.19674e-10	1.74771e-06	0.664243
rs75265799	11741749_x_at	LRRC2	-6.5338	1.19676e-10	1.74771e-06	-0.938512
rs117019330	11716638_s_at	COL4A1	-6.5329	1.20361e-10	1.75555e-06	-0.598341
rs2814778	11741011_a_at	SACM1L	-6.53166	1.21307e-10	1.76717e-06	-0.176522
rs2814778	11717866_s_at	PSME4	-6.52801	1.24131e-10	1.8061e-06	-0.14862
rs2814778	11715965_at	ST14	6.52741	1.24599e-10	1.81068e-06	0.346693
rs115619982	11723700_at	OAS3	-6.52701	1.24918e-10	1.8131e-06	-0.8868
rs75265799	11715112_at	ERICH3	-6.52399	1.27318e-10	1.84566e-06	-0.528215
rs2814778	11753211_x_at	NA	6.523	1.28113e-10	1.85491e-06	0.171826
rs1378833	11734144_s_at	NA	6.52218	1.2878e-10	1.8623e-06	0.393038
rs2814778	11759110_a_at	HIST1H2BH	-6.51998	1.3058e-10	1.88424e-06	-0.348896
rs113239743	11726125_at	HOXA5	-6.51993	1.30616e-10	1.88424e-06	-1.10299
rs9603820	11743342_a_at	RMND5A	-6.51679	1.33228e-10	1.91959e-06	-0.387596
rs17029268	11729125_s_at	RCN2	-6.51506	1.34687e-10	1.93825e-06	-0.276193
rs2814778	11756134_a_at	FHL2	-6.51304	1.36416e-10	1.96075e-06	-0.330183
rs74556234	11754855_a_at	MOBP	-6.51159	1.37661e-10	1.97625e-06	-0.977489
rs2814778	11727162_x_at	NFIX	-6.50966	1.39345e-10	1.998e-06	-0.382869
rs2814778	11727314_a_at	ABCC5	6.50681	1.41871e-10	2.03176e-06	0.32335
rs113239743	11758795_at	MRPL45	-6.50399	1.44404e-10	2.06554e-06	-1.17355
rs9603820	11720487_a_at	HEBP2	6.50318	1.45147e-10	2.07366e-06	0.338349
rs2814778	11740117_a_at	RNF24	6.50228	1.45968e-10	2.08288e-06	0.300027
rs2814778	11718196_x_at	ATP6V0D1	6.5	1.48081e-10	2.11049e-06	0.201394
rs2971627	11727404_a_at	GPC4	-6.49735	1.50568e-10	2.14079e-06	-0.944252
rs2911645	11727404_a_at	GPC4	-6.49735	1.50568e-10	2.14079e-06	-0.944252
rs3799468	11729617_a_at	UBE2J2	-6.49678	1.51106e-10	2.14585e-06	-1.04231
rs9603820	11717136_x_at	PCSK1N	-6.4949	1.52898e-10	2.16772e-06	-0.512511
rs2814778	11720057_a_at	POLR1D	-6.49478	1.53012e-10	2.16772e-06	-0.158108
rs115619982	11743717_at	SMTNL1	-6.49439	1.53394e-10	2.17053e-06	-2.14719
rs2814778	11746523_x_at	FOXO3	-6.49414	1.53628e-10	2.17125e-06	-0.347294
rs2814778	11716785_at	TRAK2	-6.49385	1.53907e-10	2.1726e-06	-0.410511
rs2814778	11727082_a_at	NA	6.4932	1.54542e-10	2.17897e-06	0.24675
rs2814778	11758102_s_at	TMEM163	-6.49233	1.55391e-10	2.18568e-06	-0.32268
rs75540417	11729781_at	RTL8B	-6.49233	1.55391e-10	2.18568e-06	-0.6688
rs16996942	11731947_at	PAQR9	-6.49214	1.55571e-10	2.18568e-06	-1.93959
rs75411903	11731474_at	SFRP4	-6.49043	1.5725e-10	2.20485e-06	-0.542863
rs2814778	11759749_at	KLF3	-6.49037	1.57308e-10	2.20485e-06	-0.474511
rs2814778	11741105_a_at	FHL2	-6.49016	1.57515e-10	2.20514e-06	-0.276317
rs2814778	11718892_s_at	NA	-6.48945	1.58224e-10	2.21245e-06	-0.242226
rs2814778	11718195_a_at	ATP6V0D1	6.48647	1.6121e-10	2.25154e-06	0.219925
rs2814778	11746263_a_at	FECH	-6.48369	1.64044e-10	2.28722e-06	-0.542104
rs9603820	11718891_s_at	NA	-6.48359	1.64151e-10	2.28722e-06	-0.409386
rs1378833	11742750_a_at	GSPT1	-6.48298	1.64783e-10	2.29237e-06	-0.525472
rs2814778	11758830_at	SLA	6.48286	1.64907e-10	2.29237e-06	0.23617
rs78571577	11758545_s_at	RHAG	-6.4787	1.69256e-10	2.35006e-06	-1.25646
rs115619982	11736134_a_at	OAS2	-6.47187	1.76665e-10	2.45006e-06	-3.15714
rs2814778	11716557_a_at	TNS1	-6.47135	1.77235e-10	2.4551e-06	-0.554451
rs2814778	11721900_at	FCN1	6.46939	1.79422e-10	2.48248e-06	0.188968
rs117124040	11716384_at	CCL2	-6.46748	1.81588e-10	2.50951e-06	-2.08764
rs2814778	11720494_a_at	CTNNAL1	-6.46711	1.82008e-10	2.51239e-06	-0.634998
rs2814778	11740559_a_at	NSMAF	6.46657	1.8262e-10	2.5175e-06	0.176015
rs2814778	11737373_at	TCP11L2	-6.46641	1.82803e-10	2.5175e-06	-0.46176
rs9603820	11716815_at	SLC2A1	-6.46043	1.89769e-10	2.61039e-06	-0.539857
rs78571577	11741315_a_at	PLSCR4	-6.45982	1.90504e-10	2.61747e-06	-1.43821
rs117019330	11747927_a_at	POSTN	-6.45751	1.93272e-10	2.65242e-06	-0.401911
rs2814778	11728691_a_at	MKRN1	-6.45723	1.93611e-10	2.6525e-06	-0.247787
rs2814778	11728672_x_at	UBE2H	-6.45703	1.9385e-10	2.6525e-06	-0.341614
rs2814778	11715417_s_at	NA	-6.45695	1.9395e-10	2.6525e-06	-0.180702
rs9603820	11733768_x_at	LILRA2	6.45604	1.95048e-10	2.66445e-06	0.269167
rs1378833	11725950_s_at	RIOK3	-6.45552	1.95694e-10	2.67019e-06	-0.346719
rs2814778	11749812_s_at	NA	-6.45131	2.00908e-10	2.73818e-06	-0.422055
rs2814778	11759400_at	PSMF1	-6.44731	2.05988e-10	2.80419e-06	-0.375105
rs3799468	11733810_x_at	UBE2J2	-6.4466	2.06902e-10	2.8133e-06	-0.865123
rs75540417	11719440_at	NA	-6.44642	2.07133e-10	2.8133e-06	-1.24375
rs2814778	11739339_s_at	TENT5C	-6.44523	2.08673e-10	2.83098e-06	-0.492277
rs9603820	11742714_a_at	TBRG1	6.44355	2.10874e-10	2.85757e-06	0.315586
rs2814778	11740098_a_at	ANK1	-6.44301	2.11588e-10	2.86396e-06	-0.682218
rs9603820	11733100_at	USP12	-6.44272	2.11965e-10	2.86579e-06	-0.504939
rs75411903	11730032_at	MKX	-6.4421	2.12787e-10	2.87362e-06	-0.741231
rs2814778	11718838_a_at	MON1B	6.43946	2.16329e-10	2.91813e-06	0.190115
rs2814778	11723205_a_at	PGD	6.43909	2.1683e-10	2.92157e-06	0.204588
rs2814778	11749960_a_at	PSMF1	-6.43831	2.17887e-10	2.93247e-06	-0.32997
rs9900782	11744121_a_at	LGALS4	-6.43775	2.18647e-10	2.93935e-06	-1.18486
rs2814778	11717276_s_at	MAPK14	6.43647	2.20395e-10	2.9595e-06	0.190484
rs79345033	11733727_s_at	SNAP25	-6.43294	2.25303e-10	3.02198e-06	-0.497139
rs9603820	11741786_a_at	TSPAN16	6.42735	2.33275e-10	3.12536e-06	0.660743
rs2814778	11731778_a_at	2019-03-01	6.42684	2.3402e-10	3.1318e-06	0.331971
rs7528331	11729874_at	SIGLEC9	6.42458	2.3734e-10	3.17264e-06	0.316638
rs117019330	11739134_a_at	COL5A2	-6.42425	2.3783e-10	3.17561e-06	-0.361946
rs2814778	11720218_a_at	MAP3K3	6.4237	2.3864e-10	3.18285e-06	0.12511
rs1378833	11753170_a_at	CD300C	6.42304	2.39623e-10	3.19236e-06	0.327865
rs2814778	11731781_x_at	GSTA3	-6.42236	2.40635e-10	3.20224e-06	-0.102298
rs2814778	11722022_s_at	CDK5R1	6.41997	2.44243e-10	3.2466e-06	0.420597
rs78571577	11740900_a_at	C4orf45	-6.41836	2.4671e-10	3.27438e-06	-1.06071
rs2814778	11745175_a_at	MKRN1	-6.41824	2.46886e-10	3.27438e-06	-0.252722
rs2814778	11736837_a_at	TPCN2	6.4179	2.47417e-10	3.27775e-06	0.277988
rs115619982	11728039_s_at	CCL8	-6.41758	2.47904e-10	3.28054e-06	-2.60181
rs113239743	11729671_s_at	FAM200B	-6.41619	2.50055e-10	3.30531e-06	-1.13409
rs2814778	11753626_a_at	CDA	6.41507	2.51802e-10	3.32469e-06	0.30575
rs7528331	11731780_at	GSTA3	-6.41393	2.53597e-10	3.34466e-06	-0.124207
rs2814778	11727497_x_at	ZRANB1	-6.41355	2.54186e-10	3.34871e-06	-0.225711
rs2814778	11728424_x_at	PILRA	6.41237	2.56059e-10	3.36963e-06	0.160373
rs9603820	11736836_at	TPCN2	6.41205	2.56569e-10	3.3726e-06	0.39018
rs79727142	11729956_a_at	KNG1	-6.40912	2.61279e-10	3.43069e-06	-0.342699
rs2814778	11724248_s_at	TMEM127	6.40894	2.61581e-10	3.43086e-06	0.107632
rs78571577	11731986_a_at	NA	-6.40816	2.62852e-10	3.44371e-06	-0.631741
rs2814778	11737269_x_at	RHD	-6.40629	2.65914e-10	3.47999e-06	-0.457823
rs2814778	11717217_at	STK10	6.40275	2.71821e-10	3.55241e-06	0.174413
rs2814778	11744805_x_at	NA	6.40262	2.72048e-10	3.55241e-06	0.194193
rs9603820	11753421_a_at	CITED2	-6.40059	2.75496e-10	3.59346e-06	-0.283701
rs2814778	11756127_a_at	PGM1	6.39968	2.77062e-10	3.60638e-06	0.169288
rs75265799	11740095_a_at	LRRC2	-6.39951	2.77342e-10	3.60638e-06	-0.629304
rs2814778	11719412_at	PBX1	-6.39948	2.774e-10	3.60638e-06	-0.613908
rs2814778	11752202_a_at	HAL	6.39833	2.79381e-10	3.62816e-06	0.381859
rs2814778	11750711_a_at	ACOX1	6.39055	2.93194e-10	3.80071e-06	0.3065
rs9603820	11731442_at	ARHGEF12	-6.39048	2.9331e-10	3.80071e-06	-0.626388
rs10487776	11730489_at	DOK6	-6.3872	2.99329e-10	3.87447e-06	-1.34525
rs2814778	11752506_s_at	LMNA	-6.38579	3.0196e-10	3.90425e-06	-0.361265
rs116450299	11717220_at	NFIB	-6.38533	3.02821e-10	3.91112e-06	-0.492762
rs7528331	11731442_at	ARHGEF12	-6.38475	3.03911e-10	3.92092e-06	-0.513921
rs16996942	11757573_s_at	FZD5	-6.38328	3.06692e-10	3.9525e-06	-1.07399
rs2814778	11758020_s_at	EIF5	-6.38289	3.07441e-10	3.95408e-06	-0.183303
rs2814778	11726921_a_at	ARSG	6.38286	3.07483e-10	3.95408e-06	0.213076
rs2814778	11739958_x_at	BCL2L1	-6.38248	3.08222e-10	3.95929e-06	-0.450234
rs2814778	11762788_at	ERVK3-2	-6.37685	3.19148e-10	4.0952e-06	-0.37204
rs10487776	11729094_a_at	GAD1	-6.37463	3.23545e-10	4.14713e-06	-1.24143
rs75540417	11734337_at	THSD7B	-6.37156	3.2975e-10	4.22209e-06	-0.649754
rs2814778	11747444_s_at	NA	6.37089	3.31113e-10	4.23497e-06	0.298065
rs78571577	11727498_at	ZRANB1	-6.36989	3.3318e-10	4.2568e-06	-1.18485
rs2814778	11732103_s_at	NA	-6.36913	3.34738e-10	4.27211e-06	-0.247826
rs2814778	11735177_at	HAL	6.36882	3.35376e-10	4.27563e-06	0.29208
rs17056310	11722911_at	USP13	-6.36851	3.36021e-10	4.27926e-06	-1.30564
rs2814778	11719414_a_at	PBX1	-6.36782	3.37455e-10	4.2929e-06	-0.563301
rs117019330	11715493_a_at	CYR61	-6.36623	3.40798e-10	4.33077e-06	-0.368632
rs9603820	11716812_x_at	SIN3B	6.36548	3.42366e-10	4.34604e-06	0.347384
rs2814778	11719789_x_at	TUBB2A	-6.36108	3.51796e-10	4.46096e-06	-1.25115
rs1378833	11731442_at	ARHGEF12	-6.35915	3.56004e-10	4.5095e-06	-0.41086
rs2814778	11757845_s_at	ENDOD1	-6.35853	3.57375e-10	4.52202e-06	-0.268624
rs2814778	11720097_at	LIMD2	6.35771	3.59197e-10	4.54023e-06	0.118351
rs9900782	11729125_s_at	RCN2	-6.35701	3.60753e-10	4.55026e-06	-0.824218
rs2814778	11743063_x_at	PLAUR	6.357	3.60759e-10	4.55026e-06	0.258464
rs2814778	11746493_a_at	PIP4K2A	-6.35469	3.65937e-10	4.61066e-06	-0.535912
rs2814778	11717176_at	SNX27	6.35329	3.69111e-10	4.6457e-06	0.180422
rs113239743	11758316_s_at	SRPRA	-6.35185	3.72414e-10	4.6823e-06	-2.44014
rs9603820	11726179_a_at	SOX6	-6.34964	3.77505e-10	4.74128e-06	-1.02336
rs2814778	11737534_s_at	CIDEB	6.34899	3.79033e-10	4.7513e-06	0.215135
rs2814778	11747546_a_at	PIP5K1B	-6.34895	3.79118e-10	4.7513e-06	-0.323142
rs9603820	11721817_a_at	SH3BP5L	6.34879	3.79506e-10	4.7513e-06	0.321859
rs2814778	11739122_a_at	EPB41	-6.34587	3.86377e-10	4.8322e-06	-0.41392
rs113239743	11720042_a_at	NA	-6.34516	3.88068e-10	4.84824e-06	-2.28017
rs75265799	11736797_s_at	RUNX1T1	-6.34425	3.90252e-10	4.87039e-06	-1.07391
rs2814778	11744505_x_at	TP53I11	6.34182	3.96142e-10	4.93868e-06	0.354682
rs9603820	11729739_at	SIGLEC5	6.34147	3.96984e-10	4.94398e-06	0.547325
rs2814778	11732119_a_at	USP10	6.34057	3.99193e-10	4.96626e-06	0.270799
rs113239743	11762819_at	KLK14	-6.33796	4.05659e-10	5.04141e-06	-1.20086
rs2814778	11760387_at	IL16	6.33081	4.23898e-10	5.26256e-06	0.199589
rs2814778	11754453_s_at	NA	-6.32895	4.28767e-10	5.31233e-06	-0.565708
rs115619982	11737177_at	SLC25A21	-6.32894	4.28804e-10	5.31233e-06	-0.57951
rs2814778	11731448_a_at	SNCA	-6.3272	4.33405e-10	5.36372e-06	-0.964903
rs28835572	11754966_a_at	AIF1L	-6.32486	4.39695e-10	5.43022e-06	-1.61917
rs111833320	11754966_a_at	AIF1L	-6.32486	4.39695e-10	5.43022e-06	-1.61917
rs17056310	11729805_a_at	PPHLN1	-6.32291	4.44971e-10	5.48965e-06	-1.38796
rs9603820	11744965_x_at	TMCC2	-6.32155	4.4872e-10	5.53014e-06	-0.723158
rs114699955	11729941_at	TMEM56	-6.32031	4.52137e-10	5.56389e-06	-1.06764
rs115619982	11721426_at	FZD5	-6.32022	4.52398e-10	5.56389e-06	-1.53258
rs2814778	11752474_a_at	SFRP5	-6.31859	4.56946e-10	5.614e-06	-0.164579
rs9603820	11727597_at	PADI2	6.31305	4.72742e-10	5.77536e-06	0.337211
rs117019330	11742934_s_at	POC1A	-6.31303	4.72799e-10	5.77536e-06	-0.758885
rs2814778	11750945_x_at	CYP4F3	6.31277	4.73553e-10	5.77536e-06	0.287554
rs116237994	11755367_s_at	DNAAF3	-6.31259	4.74071e-10	5.77536e-06	-0.764124
rs2814778	11730973_a_at	CA4	6.3117	4.76661e-10	5.77536e-06	0.392134
rs117331810	11722716_s_at	STK35	6.31162	4.76907e-10	5.77536e-06	1.24634
rs9839996	11722716_s_at	STK35	6.31162	4.76907e-10	5.77536e-06	1.24634
rs76089552	11722716_s_at	STK35	6.31162	4.76907e-10	5.77536e-06	1.24634
rs201877628	11722716_s_at	STK35	6.31162	4.76907e-10	5.77536e-06	1.24634
rs76713772	11722716_s_at	STK35	6.31162	4.76907e-10	5.77536e-06	1.24634
rs114450321	11722716_s_at	STK35	6.31162	4.76907e-10	5.77536e-06	1.24634
rs116226558	11722716_s_at	STK35	6.31162	4.76907e-10	5.77536e-06	1.24634
rs76406842	11722716_s_at	STK35	6.31162	4.76907e-10	5.77536e-06	1.24634
rs9984933	11722716_s_at	STK35	6.31162	4.76907e-10	5.77536e-06	1.24634
rs115515568	11722716_s_at	STK35	6.31116	4.78247e-10	5.78567e-06	1.24625
rs75135281	11722716_s_at	STK35	6.30812	4.87229e-10	5.88832e-06	1.24568
rs2814778	11724867_a_at	GAB2	6.30787	4.87982e-10	5.89141e-06	0.247095
rs115274671	11727403_at	GPC4	-6.30523	4.95942e-10	5.98141e-06	-1.02663
rs2814778	11717241_a_at	MAEA	6.30371	5.00572e-10	6.03111e-06	0.123304
rs9603820	11719784_x_at	RPS23	6.30034	5.1101e-10	6.15062e-06	0.87802
rs2814778	11739347_a_at	PIP4K2A	-6.29995	5.12245e-10	6.15922e-06	-0.426592
rs2814778	11721829_at	C9orf78	-6.29972	5.12952e-10	6.16147e-06	-0.255358
rs7528331	11721930_a_at	TMCC2	-6.29798	5.18464e-10	6.22137e-06	-0.468916
rs2814778	11717223_a_at	EXTL3	6.29774	5.19215e-10	6.22407e-06	0.248201
rs115110965	11735040_at	RPL3L	-6.29713	5.2114e-10	6.24084e-06	-1.28131
rs2814778	11749574_a_at	RPA2	6.29617	5.24235e-10	6.27155e-06	0.153273
rs2814778	11757684_a_at	TPD52L2	6.29595	5.24941e-10	6.27366e-06	0.14349
rs74556234	11733727_s_at	SNAP25	-6.29504	5.27847e-10	6.30204e-06	-0.596084
rs75540417	11731454_a_at	SEC62	-6.29368	5.32255e-10	6.34427e-06	-1.14135
rs115515568	11752460_a_at	NDST3	-6.29362	5.32456e-10	6.34427e-06	-0.709539
rs75135281	11752460_a_at	NDST3	-6.29194	5.3795e-10	6.37001e-06	-0.709359
rs115619982	11718273_a_at	EIF3L	6.29122	5.40323e-10	6.37001e-06	0.753288
rs117331810	11752460_a_at	NDST3	-6.29116	5.40532e-10	6.37001e-06	-0.709274
rs9839996	11752460_a_at	NDST3	-6.29116	5.40532e-10	6.37001e-06	-0.709274
rs76089552	11752460_a_at	NDST3	-6.29116	5.40532e-10	6.37001e-06	-0.709274
rs201877628	11752460_a_at	NDST3	-6.29116	5.40532e-10	6.37001e-06	-0.709274
rs76713772	11752460_a_at	NDST3	-6.29116	5.40532e-10	6.37001e-06	-0.709274
rs114450321	11752460_a_at	NDST3	-6.29116	5.40532e-10	6.37001e-06	-0.709274
rs116226558	11752460_a_at	NDST3	-6.29116	5.40532e-10	6.37001e-06	-0.709274
rs76406842	11752460_a_at	NDST3	-6.29116	5.40532e-10	6.37001e-06	-0.709274
rs9984933	11752460_a_at	NDST3	-6.29116	5.40532e-10	6.37001e-06	-0.709274
rs2814778	11750918_a_at	HEPACAM2	-6.28987	5.44811e-10	6.41405e-06	-0.250196
rs10487776	11758545_s_at	RHAG	-6.28943	5.46276e-10	6.42093e-06	-1.22165
rs114699955	11741544_at	SLFN14	-6.28928	5.46784e-10	6.42093e-06	-0.632417
rs75135281	11731474_at	SFRP4	-6.28893	5.47968e-10	6.42093e-06	-0.744611
rs115515568	11731474_at	SFRP4	-6.28796	5.51222e-10	6.42093e-06	-0.744502
rs117331810	11731474_at	SFRP4	-6.28759	5.52443e-10	6.42093e-06	-0.74446
rs9839996	11731474_at	SFRP4	-6.28759	5.52443e-10	6.42093e-06	-0.74446
rs76089552	11731474_at	SFRP4	-6.28759	5.52443e-10	6.42093e-06	-0.74446
rs201877628	11731474_at	SFRP4	-6.28759	5.52443e-10	6.42093e-06	-0.74446
rs76713772	11731474_at	SFRP4	-6.28759	5.52443e-10	6.42093e-06	-0.74446
rs114450321	11731474_at	SFRP4	-6.28759	5.52443e-10	6.42093e-06	-0.74446
rs116226558	11731474_at	SFRP4	-6.28759	5.52443e-10	6.42093e-06	-0.74446
rs76406842	11731474_at	SFRP4	-6.28759	5.52443e-10	6.42093e-06	-0.74446
rs9984933	11731474_at	SFRP4	-6.28759	5.52443e-10	6.42093e-06	-0.74446
rs113239743	11731493_at	ITCH	-6.28639	5.56537e-10	6.45964e-06	-1.77556
rs2814778	11724683_a_at	CD300A	6.28629	5.56865e-10	6.45964e-06	0.139331
rs2814778	11731270_a_at	MGAM	6.28224	5.70814e-10	6.61497e-06	0.387684
rs78571577	11741141_x_at	NEDD4L	-6.27901	5.82182e-10	6.74012e-06	-1.65552
rs2814778	11746023_a_at	PGD	6.27829	5.84742e-10	6.76315e-06	0.208
rs113239743	11752458_a_at	PKM	-6.27682	5.89996e-10	6.81725e-06	-1.44249
rs2814778	11763884_x_at	NA	6.27505	5.96406e-10	6.8846e-06	0.347338
rs2814778	11755476_a_at	NMNAT3	-6.27311	6.03514e-10	6.95987e-06	-0.354365
rs113239743	11763498_x_at	CPT1C	-6.27242	6.06078e-10	6.98265e-06	-0.86158
rs79112113	11729803_a_at	LYPD5	-6.27144	6.09711e-10	7.01767e-06	-0.351005
rs2814778	11727161_a_at	NFIX	-6.27004	6.14925e-10	7.07081e-06	-0.411852
rs2814778	11745433_a_at	PHC2	6.26988	6.15522e-10	7.07081e-06	0.294856
rs1378833	11743089_a_at	LRRC6	6.26969	6.16223e-10	7.07201e-06	0.54413
rs2814778	11737525_at	CEACAM4	6.26569	6.31458e-10	7.23984e-06	0.344636
rs9603820	11757055_x_at	SH3BP5L	6.26426	6.36956e-10	7.2958e-06	0.325632
rs2814778	11740837_a_at	TCEANC	-6.26397	6.38094e-10	7.30178e-06	-0.286583
rs2814778	11734529_x_at	PILRA	6.2614	6.48163e-10	7.40732e-06	0.137295
rs2814778	11726326_a_at	DCUN1D1	-6.2613	6.48568e-10	7.40732e-06	-0.41889
rs2814778	11742883_at	ST6GALNAC2	6.25704	6.65574e-10	7.59422e-06	0.312051
rs2814778	11721493_a_at	SULF2	6.25639	6.68218e-10	7.61705e-06	0.205822
rs1378833	11726178_a_at	SOX6	-6.25591	6.70187e-10	7.62754e-06	-0.404587
rs2814778	11758187_x_at	NA	-6.25585	6.70426e-10	7.62754e-06	-0.170829
rs2814778	11757303_s_at	BNIP3L	-6.25178	6.87229e-10	7.80742e-06	-0.518936
rs2814778	11747185_x_at	ANK1	-6.2517	6.87555e-10	7.80742e-06	-0.524454
rs75411903	11725997_at	DDX25	-6.24896	6.99126e-10	7.93121e-06	-0.748973
rs2814778	11751446_a_at	RMND5A	-6.24879	6.99848e-10	7.9318e-06	-0.267517
rs2814778	11728717_at	CXCL5	-6.24822	7.02275e-10	7.9517e-06	-0.630809
rs75411903	11740310_a_at	ZNF460	-6.24539	7.14466e-10	8.082e-06	-1.00381
rs12573886	11728503_at	CD300C	6.24303	7.24755e-10	8.19058e-06	1.48374
rs2814778	11722031_s_at	RNF11	-6.24259	7.26714e-10	8.20488e-06	-0.556057
rs2814778	11755945_a_at	YPEL4	-6.24191	7.29699e-10	8.23074e-06	-0.315428
rs2814778	11719788_s_at	TUBB2A	-6.24141	7.31914e-10	8.24787e-06	-1.29054
rs115515568	11744049_at	MAP1B	-6.23974	7.39381e-10	8.29661e-06	-1.03084
rs117331810	11744049_at	MAP1B	-6.23888	7.43244e-10	8.29661e-06	-1.0307
rs9839996	11744049_at	MAP1B	-6.23888	7.43244e-10	8.29661e-06	-1.0307
rs76089552	11744049_at	MAP1B	-6.23888	7.43244e-10	8.29661e-06	-1.0307
rs201877628	11744049_at	MAP1B	-6.23888	7.43244e-10	8.29661e-06	-1.0307
rs76713772	11744049_at	MAP1B	-6.23888	7.43244e-10	8.29661e-06	-1.0307
rs114450321	11744049_at	MAP1B	-6.23888	7.43244e-10	8.29661e-06	-1.0307
rs116226558	11744049_at	MAP1B	-6.23888	7.43244e-10	8.29661e-06	-1.0307
rs76406842	11744049_at	MAP1B	-6.23888	7.43244e-10	8.29661e-06	-1.0307
rs9984933	11744049_at	MAP1B	-6.23888	7.43244e-10	8.29661e-06	-1.0307
rs75135281	11744049_at	MAP1B	-6.23763	7.48938e-10	8.35229e-06	-1.0305
rs2814778	11716856_a_at	B4GALT3	-6.23634	7.54817e-10	8.40994e-06	-0.161917
rs2814778	11732022_a_at	TTC25	-6.23542	7.59035e-10	8.44899e-06	-0.562802
rs2814778	11733360_x_at	SLC14A1	-6.23491	7.6141e-10	8.46746e-06	-0.629713
rs2814778	11731451_at	SEC62	-6.23264	7.71945e-10	8.57125e-06	-0.434352
rs2814778	11717337_a_at	ITGB2	6.23259	7.7219e-10	8.57125e-06	0.108514
rs2814778	11739910_a_at	ELOVL6	-6.23236	7.73274e-10	8.57525e-06	-0.219566
rs16996942	11729942_at	TMEM56	-6.22746	7.966e-10	8.82565e-06	-1.52292
rs2814778	11745531_a_at	2019-03-03	-6.22372	8.14818e-10	9.01906e-06	-0.254727
rs2814778	11743280_a_at	WNK1	-6.22195	8.23597e-10	9.10771e-06	-0.319948
rs7528331	11759103_at	CYP4F3	6.22092	8.28787e-10	9.15656e-06	0.415791
rs2814778	11731846_a_at	SYTL3	6.21914	8.37742e-10	9.24688e-06	0.222922
rs78229408	11733727_s_at	SNAP25	-6.21201	8.74699e-10	9.64581e-06	-0.416787
rs115080214	11756342_s_at	GDA	-6.21061	8.82123e-10	9.71863e-06	-0.999676
rs9603820	11739303_a_at	DLC1	-6.2101	8.84858e-10	9.73971e-06	-0.534101
rs115619982	11764077_s_at	EDIL3	-6.20994	8.85684e-10	9.73974e-06	-1.22281
rs2814778	11761297_x_at	TSPAN16	6.2066	9.03742e-10	9.9291e-06	0.232741
rs115619982	11740996_a_at	SPAG6	-6.20492	9.12998e-10	1.00215e-05	-0.822694
rs115619982	11756839_x_at	ZC3HAV1	-6.20127	9.33336e-10	1.02353e-05	-1.38095
rs10487776	11719440_at	NA	-6.19612	9.62846e-10	1.05419e-05	-1.1979
rs2814778	11737204_x_at	2019-03-08	-6.19607	9.6308e-10	1.05419e-05	-0.461696
rs2814778	11716800_at	FADD	6.19541	9.66956e-10	1.05746e-05	0.175278
rs2814778	11757776_s_at	ARG2	-6.18968	1.00096e-09	1.09364e-05	-0.307071
rs2814778	11721348_a_at	SSH3	6.18883	1.00613e-09	1.09826e-05	0.250094
rs1378833	11722469_a_at	ACSL6	-6.18788	1.01185e-09	1.1035e-05	-0.42763
rs2814778	11718920_a_at	IQSEC1	6.18755	1.01386e-09	1.10468e-05	0.117859
rs2814778	11733139_a_at	ARL4A	-6.18485	1.0305e-09	1.12177e-05	-0.46267
rs76465000	11726804_a_at	HELZ2	-6.18439	1.03338e-09	1.12319e-05	-1.68392
rs75411903	11756683_a_at	CD1E	-6.18434	1.0337e-09	1.12319e-05	-1.45826
rs2814778	11743992_at	UBE2O	-6.18358	1.03841e-09	1.12728e-05	-0.418682
rs7528331	11742316_x_at	NA	-6.18302	1.04193e-09	1.13005e-05	-0.427978
rs73145075	11726804_a_at	HELZ2	-6.18178	1.04974e-09	1.13384e-05	-1.68324
rs115754734	11726804_a_at	HELZ2	-6.18163	1.05074e-09	1.13384e-05	-1.6832
rs201421746	11760880_a_at	STAT2	-6.18132	1.05267e-09	1.13384e-05	-2.08548
rs2814778	11755103_a_at	CDA	6.18115	1.05376e-09	1.13384e-05	0.295207
rs116832035	11726804_a_at	HELZ2	-6.18095	1.055e-09	1.13384e-05	-1.68302
rs114216342	11726804_a_at	HELZ2	-6.18095	1.055e-09	1.13384e-05	-1.68302
rs73633773	11726804_a_at	HELZ2	-6.18095	1.055e-09	1.13384e-05	-1.68302
rs17083871	11726804_a_at	HELZ2	-6.18095	1.055e-09	1.13384e-05	-1.68302
rs79598670	11726804_a_at	HELZ2	-6.18095	1.055e-09	1.13384e-05	-1.68302
rs185302072	11726804_a_at	HELZ2	-6.18095	1.055e-09	1.13384e-05	-1.68302
rs55997566	11726804_a_at	HELZ2	-6.18024	1.05956e-09	1.13727e-05	-1.68284
rs3799468	11715248_s_at	CRISP2	-6.18007	1.06063e-09	1.13727e-05	-1.25094
rs114628552	11726804_a_at	HELZ2	-6.18	1.06106e-09	1.13727e-05	-1.68278
rs77001965	11726804_a_at	HELZ2	-6.17926	1.06579e-09	1.14042e-05	-1.68259
rs79225353	11726804_a_at	HELZ2	-6.17924	1.06593e-09	1.14042e-05	-1.68258
rs61744238	11726804_a_at	HELZ2	-6.17843	1.07118e-09	1.14501e-05	-1.68242
rs2814778	11736480_at	TREML2	6.17763	1.07631e-09	1.14849e-05	0.256539
rs16996942	11741544_at	SLFN14	-6.17762	1.07638e-09	1.14849e-05	-0.717446
rs16996942	11732237_a_at	GYPA	-6.1768	1.08174e-09	1.15317e-05	-1.39936
rs74556234	11732790_a_at	PRDM16	-6.17613	1.08606e-09	1.15663e-05	-0.969122
rs2814778	11756160_x_at	CTNNAL1	-6.176	1.08694e-09	1.15663e-05	-0.615468
rs17056310	11722734_at	APPL1	-6.17551	1.09017e-09	1.15903e-05	-0.785581
rs9603820	11733482_a_at	DYRK3	-6.17438	1.09757e-09	1.16584e-05	-0.722793
rs1378833	11722470_x_at	ACSL6	-6.17339	1.10415e-09	1.17178e-05	-0.432897
rs2814778	11719632_a_at	ABCC4	-6.17267	1.10891e-09	1.17579e-05	-0.280656
rs2814778	11717582_a_at	RGCC	-6.17244	1.11049e-09	1.17641e-05	-0.302885
rs2814778	11728821_a_at	HEPACAM2	-6.16882	1.13492e-09	1.20121e-05	-0.29634
rs2814778	11716738_at	MSRB1	6.1677	1.14255e-09	1.20821e-05	0.199361
rs9603820	11716810_a_at	SIN3B	6.16709	1.14674e-09	1.21156e-05	0.324636
rs2814778	11736201_x_at	GLUD2	-6.16546	1.15804e-09	1.2216e-05	-0.144258
rs114699955	11740095_a_at	LRRC2	-6.16542	1.15831e-09	1.2216e-05	-0.607436
rs75540417	11746951_a_at	REXO2	-6.16482	1.16255e-09	1.22498e-05	-1.28383
rs1378833	11742316_x_at	NA	-6.1632	1.17391e-09	1.23585e-05	-0.34241
rs138017690	11715248_s_at	CRISP2	-6.16239	1.17963e-09	1.24077e-05	-1.24752
rs2814778	11744351_a_at	NA	6.16217	1.18121e-09	1.24133e-05	0.203831
rs2814778	11727841_a_at	PRKCD	6.16191	1.18304e-09	1.24203e-05	0.194382
rs2814778	11723412_s_at	PA2G4	-6.16178	1.18398e-09	1.24203e-05	-0.168779
rs2814778	11716556_a_at	TNS1	-6.15866	1.20632e-09	1.26435e-05	-0.600517
rs2814778	11744115_a_at	RPIA	-6.15544	1.22988e-09	1.28791e-05	-0.317649
rs117019330	11715452_s_at	COL4A2	-6.15473	1.23515e-09	1.29229e-05	-0.50972
rs2814778	11719619_at	TMEM187	6.15402	1.24042e-09	1.29552e-05	0.188702
rs9603820	11724544_a_at	POLR1A	-6.15402	1.24044e-09	1.29552e-05	-0.46937
rs9603820	11716811_s_at	SIN3B	6.15375	1.2424e-09	1.29643e-05	0.31293
rs77108619	11733432_at	AK7	-6.15255	1.25142e-09	1.30469e-05	-0.356921
rs7528331	11745373_a_at	SNX22	-6.15084	1.26428e-09	1.31694e-05	-0.616317
rs2814778	11726428_a_at	DCAF6	-6.15025	1.26876e-09	1.32045e-05	-0.315332
rs2814778	11745315_a_at	CTNNAL1	-6.14985	1.27185e-09	1.32181e-05	-0.2987
rs2814778	11753730_a_at	SNCA	-6.14979	1.2723e-09	1.32181e-05	-0.518194
rs2814778	11725438_a_at	HBD	-6.1496	1.27376e-09	1.32217e-05	-0.692685
rs1378833	11743928_at	NSUN3	-6.14934	1.27569e-09	1.32301e-05	-0.286722
rs113239743	11721293_x_at	GIT2	-6.14897	1.27858e-09	1.32484e-05	-1.1263
rs117019330	11739534_a_at	FN1	-6.14491	1.31007e-09	1.35629e-05	-0.708099
rs2814778	11723842_s_at	SNX11	6.14438	1.31424e-09	1.35942e-05	0.143796
rs2814778	11743394_a_at	AIG1	-6.14323	1.3233e-09	1.3676e-05	-0.193321
rs9603820	11731947_at	PAQR9	-6.14106	1.34059e-09	1.38426e-05	-0.509678
rs2814778	11731062_s_at	ZNF516	6.14065	1.34394e-09	1.38651e-05	0.304861
rs2814778	11745939_a_at	DNAJC6	-6.13923	1.35541e-09	1.39642e-05	-0.115759
rs9603820	11735236_x_at	SNX7	-6.13914	1.35608e-09	1.39642e-05	-0.162563
rs2814778	11753943_x_at	MICAL2	-6.13902	1.35708e-09	1.39642e-05	-0.262457
rs9603820	11726132_a_at	MYOM1	6.13861	1.36044e-09	1.39865e-05	0.314407
rs75540417	11750918_a_at	HEPACAM2	-6.13844	1.36182e-09	1.39886e-05	-1.35866
rs2814778	11716558_at	TNS1	-6.13389	1.39941e-09	1.43623e-05	-0.668453
rs56413328	11716384_at	CCL2	-6.13176	1.41738e-09	1.45342e-05	-1.98468
rs2814778	11720149_a_at	C1orf116	-6.13131	1.42119e-09	1.45606e-05	-0.388249
rs2814778	11755552_a_at	BBOF1	-6.13076	1.42582e-09	1.45731e-05	-0.399323
rs2814778	11737425_x_at	RASGRP4	6.13074	1.42605e-09	1.45731e-05	0.122848
rs77323212	11716384_at	CCL2	-6.13073	1.42611e-09	1.45731e-05	-1.98436
rs1378833	11728503_at	CD300C	6.13053	1.42778e-09	1.45777e-05	0.375698
rs115619982	11733101_at	USP12	-6.12935	1.4379e-09	1.46683e-05	-1.48225
rs117019330	11715356_x_at	COL1A2	-6.12848	1.4454e-09	1.47284e-05	-0.405412
rs2814778	11715716_at	MSN	6.12838	1.44627e-09	1.47284e-05	0.0861775
rs77108619	11744805_x_at	NA	6.12816	1.44821e-09	1.47354e-05	0.733548
rs114699955	11731986_a_at	NA	-6.12539	1.47234e-09	1.49681e-05	-0.524516
rs2814778	11755227_x_at	ANK1	-6.1252	1.47408e-09	1.49729e-05	-0.54156
rs2814778	11759566_a_at	NPL	6.12452	1.48004e-09	1.50205e-05	0.225304
rs1378833	11747143_x_at	ACSL6	-6.12227	1.5001e-09	1.52111e-05	-0.475747
rs75540417	11728950_at	LSMEM2	-6.12202	1.50231e-09	1.52206e-05	-0.979181
rs2814778	11728826_s_at	TRNP1	-6.12123	1.50941e-09	1.52794e-05	-0.286252
rs2814778	11739340_at	TENT5C	-6.11998	1.52072e-09	1.53808e-05	-0.64942
rs113239743	11739512_a_at	TIMM50	-6.11964	1.52384e-09	1.53894e-05	-1.27784
rs6022854	11715796_s_at	LUM	-6.1196	1.52418e-09	1.53894e-05	-0.229593
rs74556234	11720972_at	TOP2A	-6.11878	1.53165e-09	1.54517e-05	-0.932473
rs2814778	11755153_a_at	MRTFA	6.11753	1.54316e-09	1.55545e-05	0.192429
rs115619982	11725494_at	RSPH9	-6.11658	1.55192e-09	1.56296e-05	-2.68639
rs75147441	11722017_x_at	OLR1	-6.11584	1.55873e-09	1.56715e-05	-1.09054
rs75949790	11722017_x_at	OLR1	-6.11584	1.55873e-09	1.56715e-05	-1.09054
rs7528331	11747673_a_at	SACM1L	-6.11437	1.57247e-09	1.57962e-05	-0.242751
rs2814778	11748860_a_at	APOBEC2	-6.11335	1.5821e-09	1.58795e-05	-0.304785
rs9812589	11763012_x_at	CCL4L2	-6.11099	1.60457e-09	1.60914e-05	-0.405046
rs114699955	11741468_a_at	SOX6	-6.11025	1.61161e-09	1.61483e-05	-1.05484
rs2814778	11756316_a_at	CHI3L1	6.10805	1.63295e-09	1.63483e-05	0.469683
rs2814778	11739694_a_at	ATL1	-6.10774	1.6359e-09	1.6364e-05	-0.168194
rs1346159	11721930_a_at	TMCC2	-6.10747	1.63858e-09	1.63769e-05	-0.219341
rs2814778	11716559_x_at	TNS1	-6.10568	1.6561e-09	1.65381e-05	-0.671108
rs2814778	11720301_a_at	SLA	6.10537	1.65924e-09	1.65555e-05	0.146547
rs117019330	11715353_s_at	COL1A2	-6.10513	1.66161e-09	1.65652e-05	-0.419209
rs76228983	11761970_at	ALS2	-6.10456	1.66725e-09	1.66075e-05	-0.816647
rs2814778	11732926_a_at	VNN3	6.1044	1.66881e-09	1.66091e-05	0.29709
rs9900782	11736685_a_at	FGF5	-6.10313	1.68152e-09	1.67215e-05	-0.615962
rs2814778	11716865_a_at	SLC1A5	-6.10174	1.69549e-09	1.68463e-05	-0.341605
rs2814778	11730138_at	KLF1	-6.09955	1.71775e-09	1.70453e-05	-0.562333
rs75135281	11747582_x_at	NFATC4	-6.09949	1.7184e-09	1.70453e-05	-0.843861
rs74556234	11737420_a_at	WNT16	-6.09886	1.72485e-09	1.70949e-05	-1.60488
rs9900782	11727627_a_at	ALKBH8	-6.09788	1.73493e-09	1.7116e-05	-1.14316
rs7528331	11715417_s_at	NA	-6.09718	1.74219e-09	1.7116e-05	-0.216335
rs117331810	11747582_x_at	NFATC4	-6.09711	1.74288e-09	1.7116e-05	-0.843547
rs9839996	11747582_x_at	NFATC4	-6.09711	1.74288e-09	1.7116e-05	-0.843547
rs76089552	11747582_x_at	NFATC4	-6.09711	1.74288e-09	1.7116e-05	-0.843547
rs201877628	11747582_x_at	NFATC4	-6.09711	1.74288e-09	1.7116e-05	-0.843547
rs76713772	11747582_x_at	NFATC4	-6.09711	1.74288e-09	1.7116e-05	-0.843547
rs114450321	11747582_x_at	NFATC4	-6.09711	1.74288e-09	1.7116e-05	-0.843547
rs116226558	11747582_x_at	NFATC4	-6.09711	1.74288e-09	1.7116e-05	-0.843547
rs76406842	11747582_x_at	NFATC4	-6.09711	1.74288e-09	1.7116e-05	-0.843547
rs9984933	11747582_x_at	NFATC4	-6.09711	1.74288e-09	1.7116e-05	-0.843547
rs16996942	11758545_s_at	RHAG	-6.09622	1.75211e-09	1.71925e-05	-1.18596
rs115515568	11747582_x_at	NFATC4	-6.09553	1.75935e-09	1.72394e-05	-0.84334
rs7528331	11715796_s_at	LUM	-6.09549	1.7598e-09	1.72394e-05	-0.268753
rs1378833	11728926_at	NFAM1	6.09381	1.7774e-09	1.73974e-05	0.131699
rs2814778	11754090_a_at	SNCA	-6.0925	1.79132e-09	1.75191e-05	-0.533737
rs189740529	11753539_x_at	ZNF573	-6.09202	1.79645e-09	1.75548e-05	-0.712436
rs115619982	11754738_a_at	PDE2A	-6.09038	1.81407e-09	1.77124e-05	-1.75653
rs9603820	11762860_x_at	CD300C	6.08839	1.83563e-09	1.79081e-05	0.40453
rs117153530	11742639_a_at	RDM1	-6.0874	1.84654e-09	1.79998e-05	-0.819239
rs2814778	11716786_s_at	TRAK2	-6.08448	1.87888e-09	1.82999e-05	-0.380229
rs1378833	11736463_x_at	LILRA2	6.08305	1.89488e-09	1.84406e-05	0.268048
rs9603820	11723030_at	CRISPLD2	6.08251	1.90095e-09	1.84845e-05	0.337589
rs113239743	11730897_a_at	WAPL	-6.08133	1.9143e-09	1.85991e-05	-1.49794
rs75265799	11729941_at	TMEM56	-6.08098	1.91832e-09	1.86228e-05	-1.02919
rs115274671	11727404_a_at	GPC4	-6.07893	1.94182e-09	1.88355e-05	-0.44484
rs118186656	11728177_a_at	DNAAF4	-6.07871	1.94429e-09	1.8844e-05	-1.20668
rs2814778	11747506_a_at	NAP1L4	-6.07845	1.94729e-09	1.88577e-05	-0.215853
rs2814778	11734353_x_at	ANK1	-6.07703	1.96384e-09	1.90024e-05	-0.552849
rs9812589	11733767_a_at	LILRA2	6.07666	1.96815e-09	1.90286e-05	0.164985
rs115600982	11742423_a_at	STEAP2	-6.07605	1.9753e-09	1.90821e-05	-0.382078
rs2814778	11731901_a_at	SESN3	-6.07574	1.97889e-09	1.90865e-05	-0.547743
rs181768270	11715248_s_at	CRISP2	-6.07573	1.97897e-09	1.90865e-05	-1.23083
rs7528331	11763252_x_at	PSPH	-6.07515	1.98579e-09	1.91367e-05	-0.546952
rs115156754	11729475_a_at	GGN	-6.0746	1.99231e-09	1.91838e-05	-0.580481
rs2814778	11741305_a_at	2019-03-08	-6.0742	1.99702e-09	1.92001e-05	-0.474661
rs115619982	11727498_at	ZRANB1	-6.07419	1.99724e-09	1.92001e-05	-1.38613
rs9603820	11746916_a_at	SNX7	-6.07324	2.00851e-09	1.92928e-05	-0.1512
rs2814778	11763692_at	VTI1B	-6.07205	2.02272e-09	1.94136e-05	-0.263921
rs10487776	11734785_at	CLIC2	-6.07178	2.02592e-09	1.94285e-05	-1.10377
rs2814778	11752771_a_at	CHST15	6.07122	2.03274e-09	1.94646e-05	0.259633
rs115619982	11736135_at	OAS2	-6.0712	2.03297e-09	1.94646e-05	-3.14481
rs1378833	11718221_a_at	GSPT1	-6.07094	2.03611e-09	1.94789e-05	-0.224338
rs78571577	11719440_at	NA	-6.0688	2.06202e-09	1.97109e-05	-1.17447
rs2814778	11717746_a_at	2019-03-06	-6.06865	2.06388e-09	1.97128e-05	-0.134268
rs2814778	11719183_a_at	DEF8	6.06832	2.06799e-09	1.9736e-05	0.215689
rs117153530	11718476_x_at	STAR	-6.06785	2.07376e-09	1.97752e-05	-1.03113
rs9603820	11731444_a_at	ARHGEF12	-6.06684	2.08611e-09	1.98673e-05	-0.582143
rs9603820	11736463_x_at	LILRA2	6.06679	2.08677e-09	1.98673e-05	0.405727
rs75147441	11758695_s_at	C1QTNF7	-6.06489	2.11046e-09	2.00606e-05	-0.519965
rs75949790	11758695_s_at	C1QTNF7	-6.06489	2.11046e-09	2.00606e-05	-0.519965
rs115619982	11722910_s_at	CYP2R1	6.06426	2.11832e-09	2.01191e-05	1.53815
rs114018984	11724273_a_at	PTPRK	-6.0629	2.13539e-09	2.02503e-05	-0.474161
rs117153530	11755871_s_at	TNRC6A	6.06281	2.13658e-09	2.02503e-05	1.76276
rs75540417	11740900_a_at	C4orf45	-6.06276	2.13726e-09	2.02503e-05	-1.00481
rs16996942	11760253_x_at	IFI44	-6.06059	2.16488e-09	2.04957e-05	-2.35856
rs2814778	11734352_a_at	ANK1	-6.06036	2.16781e-09	2.0507e-05	-0.559019
rs3799468	11745451_x_at	UBE2J2	-6.05932	2.18115e-09	2.06027e-05	-0.910439
rs115600982	11725158_at	STEAP1	-6.0593	2.18141e-09	2.06027e-05	-0.454073
rs117153530	11719729_at	INA	-6.05794	2.19907e-09	2.0753e-05	-0.600092
rs2814778	11718319_at	CD93	6.05599	2.22464e-09	2.09775e-05	0.222634
rs10487776	11729781_at	RTL8B	-6.05499	2.23782e-09	2.10851e-05	-0.625959
rs55846997	11755367_s_at	DNAAF3	-6.05422	2.24806e-09	2.11647e-05	-0.148602
rs117153530	11723166_a_at	EPHB2	-6.05406	2.25021e-09	2.11681e-05	-1.09873
rs7528331	11763150_x_at	GYPB	-6.05348	2.25795e-09	2.11891e-05	-0.516417
rs2814778	11756205_x_at	DCAF6	-6.0534	2.25901e-09	2.11891e-05	-0.322221
rs61744238	11752277_a_at	STON2	-6.05334	2.25979e-09	2.11891e-05	-1.13941
rs2814778	11746681_a_at	VNN3	6.05326	2.2609e-09	2.11891e-05	0.284576
rs2814778	11721655_at	CISD2	-6.05322	2.26139e-09	2.11891e-05	-0.291746
rs117019330	11758196_s_at	IGFBP5	-6.05301	2.26418e-09	2.11984e-05	-0.327361
rs114628552	11752277_a_at	STON2	-6.05135	2.28658e-09	2.1376e-05	-1.13901
rs78571577	11725743_s_at	SORBS1	-6.05121	2.28838e-09	2.1376e-05	-1.00981
rs2814778	11760526_at	LIG3	6.0512	2.28856e-09	2.1376e-05	0.233059
rs76465000	11752277_a_at	STON2	-6.05074	2.29475e-09	2.14169e-05	-1.13891
rs115619982	11753207_a_at	MOB1B	-6.05004	2.30425e-09	2.14831e-05	-1.68504
rs79225353	11752277_a_at	STON2	-6.04981	2.30739e-09	2.14831e-05	-1.13874
rs115754734	11752277_a_at	STON2	-6.0491	2.31713e-09	2.14831e-05	-1.13861
rs1378833	11717337_a_at	ITGB2	6.04885	2.32053e-09	2.14831e-05	0.106997
rs73145075	11752277_a_at	STON2	-6.04885	2.32058e-09	2.14831e-05	-1.13857
rs116832035	11752277_a_at	STON2	-6.04876	2.32178e-09	2.14831e-05	-1.13855
rs114216342	11752277_a_at	STON2	-6.04876	2.32178e-09	2.14831e-05	-1.13855
rs73633773	11752277_a_at	STON2	-6.04876	2.32178e-09	2.14831e-05	-1.13855
rs17083871	11752277_a_at	STON2	-6.04876	2.32178e-09	2.14831e-05	-1.13855
rs79598670	11752277_a_at	STON2	-6.04876	2.32178e-09	2.14831e-05	-1.13855
rs185302072	11752277_a_at	STON2	-6.04876	2.32178e-09	2.14831e-05	-1.13855
rs77001965	11752277_a_at	STON2	-6.04795	2.33296e-09	2.15549e-05	-1.1384
rs55997566	11752277_a_at	STON2	-6.04784	2.33451e-09	2.15549e-05	-1.13839
rs2814778	11762946_at	NA	6.04779	2.33517e-09	2.15549e-05	0.199504
rs115754734	11722163_x_at	PLK2	-6.04767	2.33683e-09	2.15549e-05	-0.907338
rs2814778	11742939_a_at	UBE2D3	-6.04695	2.34682e-09	2.16303e-05	-0.129136
rs2814778	11736482_at	TREML2	6.04677	2.34927e-09	2.16338e-05	0.297878
rs75540417	11734785_at	CLIC2	-6.04666	2.35086e-09	2.16338e-05	-1.09942
rs75540417	11725490_s_at	ATG14	-6.04603	2.35954e-09	2.16968e-05	-1.08406
rs2814778	11755860_a_at	MME	6.04589	2.36156e-09	2.16986e-05	0.378615
rs76841445	11727403_at	GPC4	-6.04542	2.36808e-09	2.17184e-05	-1.96557
rs115619982	11723128_a_at	HERC6	-6.04516	2.3718e-09	2.17184e-05	-1.95666
rs55997566	11722163_x_at	PLK2	-6.04502	2.37365e-09	2.17184e-05	-0.906962
rs7528331	11715752_at	TSPAN7	-6.04473	2.37778e-09	2.17184e-05	-0.516084
rs116832035	11722163_x_at	PLK2	-6.04443	2.38206e-09	2.17184e-05	-0.906874
rs114216342	11722163_x_at	PLK2	-6.04443	2.38206e-09	2.17184e-05	-0.906874
rs73633773	11722163_x_at	PLK2	-6.04443	2.38206e-09	2.17184e-05	-0.906874
rs17083871	11722163_x_at	PLK2	-6.04443	2.38206e-09	2.17184e-05	-0.906874
rs79598670	11722163_x_at	PLK2	-6.04443	2.38206e-09	2.17184e-05	-0.906874
rs185302072	11722163_x_at	PLK2	-6.04443	2.38206e-09	2.17184e-05	-0.906874
rs75540417	11720057_a_at	POLR1D	-6.0442	2.38518e-09	2.17301e-05	-0.820721
rs77001965	11722163_x_at	PLK2	-6.04382	2.3906e-09	2.17506e-05	-0.906788
rs2814778	11744116_s_at	RPIA	-6.04378	2.3911e-09	2.17506e-05	-0.278874
rs79225353	11722163_x_at	PLK2	-6.04355	2.39436e-09	2.17636e-05	-0.90675
rs76465000	11722163_x_at	PLK2	-6.0433	2.39793e-09	2.17793e-05	-0.906718
rs61744238	11722163_x_at	PLK2	-6.04297	2.40262e-09	2.17854e-05	-0.906695
rs73145075	11722163_x_at	PLK2	-6.04291	2.40352e-09	2.17854e-05	-0.906659
rs2814778	11717900_at	ASF1B	6.04287	2.40412e-09	2.17854e-05	0.294732
rs75540417	11743928_at	NSUN3	-6.04223	2.4131e-09	2.185e-05	-1.54466
rs2814778	11756241_s_at	PSMF1	-6.04097	2.4312e-09	2.19971e-05	-0.195752
rs114628552	11722163_x_at	PLK2	-6.04021	2.44205e-09	2.20784e-05	-0.906273
rs118186656	11745109_a_at	TMTC1	-6.04005	2.44443e-09	2.20831e-05	-1.48255
rs75540417	11715753_a_at	TSPAN7	-6.03907	2.45859e-09	2.21837e-05	-0.757234
rs77108619	11728503_at	CD300C	6.03902	2.45931e-09	2.21837e-05	1.43757
rs75540417	11736949_at	THEM5	-6.03619	2.50082e-09	2.25247e-05	-2.82508
rs1378833	11721566_s_at	KBTBD11	6.0361	2.50206e-09	2.25247e-05	0.204765
rs2814778	11737280_at	IFIT1B	-6.03605	2.50282e-09	2.25247e-05	-0.666126
rs115619982	11743928_at	NSUN3	-6.0343	2.52876e-09	2.27408e-05	-1.88817
rs2814778	11745836_x_at	DYSF	6.03384	2.53568e-09	2.27857e-05	0.264749
rs78571577	11715753_a_at	TSPAN7	-6.03347	2.54124e-09	2.28184e-05	-0.756565
rs2814778	11753731_x_at	SNCA	-6.0309	2.58e-09	2.31489e-05	-0.521559
rs16996942	11751473_a_at	NAPG	-6.03071	2.58286e-09	2.3157e-05	-1.22705
rs2814778	11719366_s_at	CXCL1	6.03049	2.5862e-09	2.31694e-05	0.372608
rs7528331	11756683_a_at	CD1E	-6.02891	2.6105e-09	2.33694e-05	-0.264529
rs2814778	11728979_a_at	ADGRG3	6.02748	2.63251e-09	2.35487e-05	0.312639
rs79102899	11720388_s_at	C1QC	-6.02673	2.64429e-09	2.36217e-05	-0.63763
rs1378833	11752881_s_at	NA	-6.0267	2.64467e-09	2.36217e-05	-0.546721
rs2814778	11739957_a_at	BCL2L1	-6.02529	2.66681e-09	2.38015e-05	-0.388409
rs2814778	11758559_s_at	NA	-6.02242	2.71232e-09	2.41895e-05	-0.613472
rs115619982	11763335_a_at	MDH2	6.01991	2.75265e-09	2.45307e-05	1.22293
rs12573886	11715498_a_at	OXA1L	6.01956	2.75832e-09	2.45628e-05	0.42751
rs9603820	11736101_at	MAN1A1	-6.01809	2.78226e-09	2.47574e-05	-0.643361
rs2814778	11736121_x_at	ZFAND5	-6.01715	2.79767e-09	2.48757e-05	-0.181981
rs11686262	11726937_at	ST18	-6.01609	2.81522e-09	2.50131e-05	-0.261891
rs9603820	11729853_at	PADI4	6.01581	2.81981e-09	2.50351e-05	0.514412
rs2814778	11737038_at	C19orf38	6.01483	2.83613e-09	2.51611e-05	0.19995
rs115619982	11726178_a_at	SOX6	-6.01389	2.8519e-09	2.5282e-05	-2.61274
rs9603820	11728880_s_at	PPP3R1	-6.01219	2.88051e-09	2.55166e-05	-0.594069
rs117153530	11764101_at	NA	-6.01195	2.88456e-09	2.55333e-05	-0.661531
rs2814778	11716752_x_at	GNS	6.01167	2.88932e-09	2.55564e-05	0.18228
rs9603820	11726820_a_at	ARHGAP9	6.00984	2.92063e-09	2.58099e-05	0.206138
rs9812589	11733768_x_at	LILRA2	6.00974	2.92234e-09	2.58099e-05	0.189186
rs2814778	11737526_x_at	CEACAM4	6.00907	2.93385e-09	2.58746e-05	0.330014
rs2814778	11717127_a_at	ANPEP	6.00906	2.93404e-09	2.58746e-05	0.280382
rs117019330	11757685_a_at	FA2H	-6.00786	2.95479e-09	2.60383e-05	-0.340696
rs2814778	11718038_s_at	DCAF12	-6.00674	2.97426e-09	2.61903e-05	-0.325686
rs76196708	11757013_x_at	CAV1	-6.00545	2.99705e-09	2.63714e-05	-0.781983
rs7528331	11737268_s_at	NA	-6.00523	3.00077e-09	2.63845e-05	-0.684173
rs2814778	11763170_s_at	FOSL2	6.00177	3.06249e-09	2.69072e-05	0.273215
rs2814778	11726323_a_at	ACOX1	5.99911	3.11062e-09	2.73098e-05	0.278194
rs9603820	11728908_at	B3GLCT	-5.99569	3.17366e-09	2.78427e-05	-0.448732
rs73615423	11743844_a_at	PROC	-5.99286	3.22683e-09	2.82882e-05	-1.53307
rs115619982	11719651_a_at	SPAG6	-5.99176	3.24767e-09	2.84498e-05	-1.00427
rs1378833	11731134_a_at	LTB4R	5.98995	3.28248e-09	2.87336e-05	0.311413
rs2814778	11736119_a_at	ZFAND5	-5.9876	3.32794e-09	2.911e-05	-0.187808
rs116055198	11716384_at	CCL2	-5.98366	3.40572e-09	2.97683e-05	-1.58425
rs78571577	11734953_at	MBNL3	-5.9817	3.44487e-09	3.00883e-05	-1.62132
rs2814778	11750580_x_at	ARHGEF12	-5.98132	3.45259e-09	3.01335e-05	-0.503471
rs7528331	11733482_a_at	DYRK3	-5.9808	3.46318e-09	3.02036e-05	-0.575788
rs7528331	11717135_a_at	PCSK1N	-5.98039	3.47153e-09	3.02542e-05	-0.362369
rs113239743	11721292_a_at	GIT2	-5.9797	3.48547e-09	3.03533e-05	-1.14419
rs201421746	11750159_a_at	BATF2	-5.97918	3.49621e-09	3.04245e-05	-2.04318
rs75135281	11742117_a_at	LYSMD1	-5.97861	3.50794e-09	3.05042e-05	-1.62465
rs12573886	11732712_a_at	FST	-5.97788	3.52277e-09	3.06107e-05	-0.795188
rs117331810	11742117_a_at	LYSMD1	-5.97666	3.54816e-09	3.0629e-05	-1.62414
rs9839996	11742117_a_at	LYSMD1	-5.97666	3.54816e-09	3.0629e-05	-1.62414
rs76089552	11742117_a_at	LYSMD1	-5.97666	3.54816e-09	3.0629e-05	-1.62414
rs201877628	11742117_a_at	LYSMD1	-5.97666	3.54816e-09	3.0629e-05	-1.62414
rs76713772	11742117_a_at	LYSMD1	-5.97666	3.54816e-09	3.0629e-05	-1.62414
rs114450321	11742117_a_at	LYSMD1	-5.97666	3.54816e-09	3.0629e-05	-1.62414
rs116226558	11742117_a_at	LYSMD1	-5.97666	3.54816e-09	3.0629e-05	-1.62414
rs76406842	11742117_a_at	LYSMD1	-5.97666	3.54816e-09	3.0629e-05	-1.62414
rs9984933	11742117_a_at	LYSMD1	-5.97666	3.54816e-09	3.0629e-05	-1.62414
rs115515568	11742117_a_at	LYSMD1	-5.97633	3.55491e-09	3.0665e-05	-1.62406
rs1378833	11764077_s_at	EDIL3	-5.97557	3.57082e-09	3.07798e-05	-0.175819
rs2814778	11720336_a_at	PHC2	5.97378	3.60843e-09	3.10814e-05	0.260905
rs75540417	11735218_at	COL10A1	-5.97125	3.66207e-09	3.15205e-05	-0.707366
rs9603820	11724993_at	RFLNB	5.96998	3.68941e-09	3.17328e-05	0.234617
rs7528331	11755367_s_at	DNAAF3	-5.96984	3.69258e-09	3.17369e-05	-0.164821
rs2814778	11725995_x_at	XXYLT1	5.9697	3.69547e-09	3.17387e-05	0.209568
rs114699955	11741749_x_at	LRRC2	-5.96933	3.70352e-09	3.17849e-05	-0.861344
rs2814778	11756441_x_at	CSF3R	5.96914	3.70771e-09	3.17978e-05	0.125832
rs2814778	11716907_s_at	PITHD1	-5.96845	3.72264e-09	3.19027e-05	-0.233164
rs2814778	11752838_s_at	CIDEB	5.96822	3.72755e-09	3.19216e-05	0.204959
rs2814778	11745268_a_at	TNS1	-5.96752	3.74299e-09	3.20308e-05	-0.604659
rs2814778	11731447_x_at	SNCA	-5.96639	3.76767e-09	3.22186e-05	-0.490267
rs2814778	11716717_a_at	NINJ1	5.96469	3.80533e-09	3.24025e-05	0.235634
rs75411903	11749225_a_at	BTN2A2	5.96413	3.81785e-09	3.24025e-05	1.24762
rs117331810	11728632_s_at	AP4E1	-5.96406	3.81926e-09	3.24025e-05	-0.888115
rs9839996	11728632_s_at	AP4E1	-5.96406	3.81926e-09	3.24025e-05	-0.888115
rs76089552	11728632_s_at	AP4E1	-5.96406	3.81926e-09	3.24025e-05	-0.888115
rs201877628	11728632_s_at	AP4E1	-5.96406	3.81926e-09	3.24025e-05	-0.888115
rs76713772	11728632_s_at	AP4E1	-5.96406	3.81926e-09	3.24025e-05	-0.888115
rs114450321	11728632_s_at	AP4E1	-5.96406	3.81926e-09	3.24025e-05	-0.888115
rs116226558	11728632_s_at	AP4E1	-5.96406	3.81926e-09	3.24025e-05	-0.888115
rs76406842	11728632_s_at	AP4E1	-5.96406	3.81926e-09	3.24025e-05	-0.888115
rs9984933	11728632_s_at	AP4E1	-5.96406	3.81926e-09	3.24025e-05	-0.888115
rs9603820	11721929_x_at	TMCC2	-5.96383	3.82455e-09	3.24241e-05	-0.38733
rs75135281	11728632_s_at	AP4E1	-5.96262	3.85165e-09	3.26305e-05	-0.887912
rs201421746	11730729_a_at	TAP1	-5.96121	3.88347e-09	3.28766e-05	-1.27222
rs115515568	11728632_s_at	AP4E1	-5.96083	3.89214e-09	3.29061e-05	-0.887657
rs75540417	11745315_a_at	CTNNAL1	-5.96076	3.89363e-09	3.29061e-05	-1.61139
rs2814778	11743649_a_at	DCAF6	-5.96069	3.8953e-09	3.29061e-05	-0.310309
rs2814778	11720575_s_at	CRAT	-5.96016	3.90722e-09	3.29834e-05	-0.286756
rs9603820	11728503_at	CD300C	5.95998	3.91132e-09	3.29944e-05	0.554999
rs2814778	11736573_a_at	PRKCD	5.95908	3.93204e-09	3.31456e-05	0.200469
rs117019330	11718141_at	DKK1	-5.95743	3.96997e-09	3.34415e-05	-0.344817
rs77108619	11732237_a_at	GYPA	-5.95704	3.97912e-09	3.34948e-05	-0.957898
rs2814778	11761343_a_at	ADAM8	5.95633	3.99566e-09	3.36102e-05	0.233387
rs75540417	11725950_s_at	RIOK3	-5.95616	3.99958e-09	3.36192e-05	-1.75949
rs2814778	11715418_x_at	SKP1	-5.95549	4.01514e-09	3.37261e-05	-0.155304
rs2814778	11753207_a_at	MOB1B	-5.95465	4.03489e-09	3.3868e-05	-0.244002
rs7528331	11721106_a_at	RAB3GAP1	5.95385	4.05387e-09	3.40032e-05	0.239984
rs17172670	11740095_a_at	LRRC2	-5.953	4.07393e-09	3.41472e-05	-0.445007
rs2814778	11738595_at	PF4V1	-5.95257	4.08425e-09	3.42095e-05	-0.409179
rs9603820	11739937_a_at	DYRK3	-5.95172	4.10441e-09	3.43541e-05	-0.523386
rs9603820	11752673_x_at	LMNA	-5.95125	4.11571e-09	3.44244e-05	-0.302051
rs77108619	11727281_a_at	MMP28	-5.94921	4.16489e-09	3.48111e-05	-0.44741
rs2814778	11737831_a_at	FNBP1L	-5.94906	4.16869e-09	3.48183e-05	-0.204805
rs2814778	11721709_a_at	UBN1	5.94837	4.18555e-09	3.49345e-05	0.176617
rs2814778	11743960_a_at	NA	5.94617	4.23942e-09	3.53592e-05	0.18136
rs115156754	11756545_a_at	GKN2	-5.94525	4.26228e-09	3.55249e-05	-0.793627
rs2814778	11732954_at	CCDC153	5.94501	4.26822e-09	3.55494e-05	0.296081
rs9603820	11728502_a_at	CD300C	5.94429	4.28603e-09	3.56518e-05	0.52859
rs2814778	11716533_a_at	PPT1	5.94424	4.28725e-09	3.56518e-05	0.196393
rs75540417	11726180_a_at	SOX6	-5.94415	4.28956e-09	3.56518e-05	-1.84077
rs9603820	11728839_s_at	TMCC3	5.94371	4.3005e-09	3.57177e-05	0.336519
rs7528331	11739937_a_at	DYRK3	-5.94269	4.32624e-09	3.59064e-05	-0.429155
rs2814778	11742472_a_at	NA	-5.94164	4.3528e-09	3.61015e-05	-0.179523
rs17056310	11729472_a_at	FANCA	-5.94118	4.36438e-09	3.61722e-05	-0.628413
rs115619982	11751489_a_at	TSPAN7	-5.94033	4.38596e-09	3.63256e-05	-1.161
rs75135281	11715166_at	DNAJC12	-5.94008	4.39234e-09	3.63531e-05	-0.960294
rs2814778	11759342_at	FMN1	-5.93933	4.41168e-09	3.64792e-05	-0.787357
rs115904095	11717220_at	NFIB	-5.93925	4.41375e-09	3.64792e-05	-0.543492
rs2814778	11743310_s_at	WIPI2	-5.93899	4.42045e-09	3.65091e-05	-0.0785744
rs2814778	11727403_at	GPC4	-5.93828	4.43863e-09	3.66338e-05	-0.347695
rs2814778	11758972_s_at	ZNF354C	-5.93789	4.44881e-09	3.66922e-05	-0.114593
rs117331810	11715166_at	DNAJC12	-5.93663	4.48142e-09	3.6731e-05	-0.95976
rs9839996	11715166_at	DNAJC12	-5.93663	4.48142e-09	3.6731e-05	-0.95976
rs76089552	11715166_at	DNAJC12	-5.93663	4.48142e-09	3.6731e-05	-0.95976
rs201877628	11715166_at	DNAJC12	-5.93663	4.48142e-09	3.6731e-05	-0.95976
rs76713772	11715166_at	DNAJC12	-5.93663	4.48142e-09	3.6731e-05	-0.95976
rs114450321	11715166_at	DNAJC12	-5.93663	4.48142e-09	3.6731e-05	-0.95976
rs116226558	11715166_at	DNAJC12	-5.93663	4.48142e-09	3.6731e-05	-0.95976
rs76406842	11715166_at	DNAJC12	-5.93663	4.48142e-09	3.6731e-05	-0.95976
rs9984933	11715166_at	DNAJC12	-5.93663	4.48142e-09	3.6731e-05	-0.95976
rs2814778	11759116_a_at	VTI1B	-5.93639	4.48782e-09	3.6758e-05	-0.293597
rs75540417	11717628_a_at	BIRC2	-5.93573	4.50514e-09	3.68393e-05	-1.29033
rs2814778	11764034_at	LOC728392	5.93568	4.50635e-09	3.68393e-05	0.212826
rs77108619	11741749_x_at	LRRC2	-5.93565	4.50708e-09	3.68393e-05	-0.700454
rs9603820	11724635_at	YOD1	-5.93486	4.52799e-09	3.69635e-05	-0.847986
rs115515568	11715166_at	DNAJC12	-5.93484	4.52851e-09	3.69635e-05	-0.959484
rs2814778	11719302_a_at	PYGL	5.93339	4.5669e-09	3.72511e-05	0.193701
rs2814778	11724777_at	PGM2L1	-5.93314	4.57339e-09	3.72784e-05	-0.310285
rs9603820	11728715_at	CXCL5	-5.93244	4.592e-09	3.73821e-05	-0.788391
rs2814778	11756937_s_at	NA	-5.93243	4.59243e-09	3.73821e-05	-0.359769
rs2814778	11761440_a_at	MICAL2	-5.93159	4.6149e-09	3.75001e-05	-0.374645
rs2814778	11722348_a_at	REPS2	5.93156	4.61559e-09	3.75001e-05	0.292338
rs75265799	11757573_s_at	FZD5	-5.93153	4.61643e-09	3.75001e-05	-0.867975
rs2814778	11741468_a_at	SOX6	-5.92828	4.70446e-09	3.8189e-05	-0.212795
rs9603820	11759092_at	USP12	-5.92742	4.72799e-09	3.83538e-05	-0.561655
rs117153530	11743225_at	AJM1	-5.92694	4.74137e-09	3.84094e-05	-0.67723
rs79187391	11764285_at	LOC102723906	-5.92687	4.74312e-09	3.84094e-05	-0.450731
rs9812589	11762593_x_at	NUMA1	-5.92682	4.74458e-09	3.84094e-05	-0.900374
rs2814778	11760535_at	VNN3	5.92582	4.77228e-09	3.86073e-05	0.361912
rs2814778	11736219_a_at	TANGO2	-5.92525	4.78791e-09	3.87073e-05	-0.325114
rs9603820	11728716_x_at	CXCL5	-5.92385	4.82707e-09	3.89253e-05	-0.814783
rs2814778	11738858_x_at	CSF2RA	5.92382	4.82788e-09	3.89253e-05	0.214496
rs2971627	11715495_a_at	RPS25	5.92382	4.82803e-09	3.89253e-05	0.389393
rs2911645	11715495_a_at	RPS25	5.92382	4.82803e-09	3.89253e-05	0.389393
rs117019330	11744380_s_at	COL3A1	-5.92335	4.84129e-09	3.90057e-05	-0.434198
rs9603820	11751446_a_at	RMND5A	-5.92202	4.87872e-09	3.92806e-05	-0.391309
rs2814778	11719534_a_at	STX3	5.92148	4.89409e-09	3.93776e-05	0.205996
rs2814778	11731879_a_at	NLRP1	5.92098	4.90819e-09	3.94425e-05	0.195215
rs115619982	11717116_at	CERK	5.92096	4.90882e-09	3.94425e-05	0.78623
rs74556234	11725040_at	FGF2	-5.92067	4.91698e-09	3.94812e-05	-1.02143
rs41314286	11763018_x_at	HSPD1	-5.91884	4.9697e-09	3.98775e-05	-0.307647
rs2814778	11751231_a_at	HAL	5.91829	4.98543e-09	3.99767e-05	0.34974
rs2814778	11737906_x_at	FOXO3	-5.91805	4.99229e-09	4.00046e-05	-0.172631
rs1378833	11725896_x_at	RIN1	5.91697	5.02391e-09	4.02308e-05	0.3313
rs138017690	11757800_s_at	NFIB	-5.91377	5.11782e-09	4.0955e-05	-1.56284
rs9603820	11735856_s_at	GYPE	-5.91313	5.13693e-09	4.10803e-05	-0.653529
rs2814778	11728423_a_at	PILRA	5.91278	5.14723e-09	4.11348e-05	0.124064
rs16996942	11727404_a_at	GPC4	-5.91261	5.15249e-09	4.11491e-05	-0.863309
rs2814778	11737032_x_at	FBXL13	5.91015	5.22652e-09	4.17122e-05	0.423445
rs77108619	11753211_x_at	NA	5.90971	5.23971e-09	4.17893e-05	0.61603
rs17056310	11737807_x_at	ABCB9	-5.90945	5.24751e-09	4.18144e-05	-1.22938
rs2814778	11759343_x_at	FMN1	-5.90938	5.24992e-09	4.18144e-05	-0.807393
rs116055198	11757849_s_at	PNMA2	-5.90714	5.3184e-09	4.23314e-05	-0.900554
rs74556234	11760983_at	L3MBTL4	-5.90673	5.33112e-09	4.24041e-05	-0.749723
rs2814778	11759550_at	ZFAS1	5.90619	5.34771e-09	4.25076e-05	0.221704
rs76841445	11740768_at	AGBL3	-5.90527	5.37635e-09	4.27066e-05	-0.617044
rs16996942	11764077_s_at	EDIL3	-5.90504	5.38334e-09	4.27334e-05	-0.952317
rs9603820	11720671_x_at	SNX7	-5.90424	5.40841e-09	4.29036e-05	-0.150775
rs2814778	11717904_a_at	STAU1	-5.90365	5.42708e-09	4.3023e-05	-0.23389
rs1378833	11718138_at	PDXK	5.90289	5.45082e-09	4.31646e-05	0.194794
rs2814778	11740410_a_at	RNF24	5.90285	5.45224e-09	4.31646e-05	0.275807
rs2814778	11721564_a_at	PLA2G4C	-5.9016	5.49179e-09	4.34487e-05	-0.36609
rs2814778	11749473_a_at	MEF2D	5.90123	5.50352e-09	4.35124e-05	0.161512
rs2814778	11716870_a_at	PHC2	5.90093	5.5131e-09	4.35591e-05	0.253848
rs9603820	11717135_a_at	PCSK1N	-5.89956	5.55694e-09	4.38762e-05	-0.435602
rs2814778	11723106_a_at	NCF4	5.89904	5.57377e-09	4.39526e-05	0.163303
rs2814778	11756078_a_at	ARHGEF37	-5.89903	5.57403e-09	4.39526e-05	-0.266695
rs2814778	11716866_x_at	SLC1A5	-5.89823	5.59976e-09	4.41261e-05	-0.333308
rs2814778	11717871_s_at	KANK2	-5.8971	5.63652e-09	4.43861e-05	-0.642868
rs2814778	11730501_a_at	CACNA2D3	5.89621	5.66563e-09	4.45857e-05	0.26204
rs2814778	11746700_s_at	ITM2A	-5.89596	5.67401e-09	4.46221e-05	-0.283284
rs9812589	11722681_at	RBP7	5.89582	5.67836e-09	4.46266e-05	0.285424
rs74556234	11763011_at	IGKC	-5.89485	5.71043e-09	4.48489e-05	-0.690978
rs9603820	11716752_x_at	GNS	5.89425	5.73017e-09	4.49741e-05	0.275386
rs78571577	11734132_x_at	SLC2A4	-5.89411	5.73493e-09	4.49816e-05	-0.899944
rs2814778	11728078_a_at	TBC1D22B	-5.89398	5.73919e-09	4.49853e-05	-0.329829
rs2814778	11745597_a_at	MICAL3	-5.89213	5.80088e-09	4.54388e-05	-0.308326
rs189740529	11731221_at	MICU3	-5.89197	5.80615e-09	4.545e-05	-1.36824
rs2814778	11726894_a_at	IRAK3	5.89135	5.82708e-09	4.55837e-05	0.267335
rs113239743	11745602_s_at	CLTA	-5.89056	5.85386e-09	4.5763e-05	-1.05345
rs1378833	11721930_a_at	TMCC2	-5.88902	5.90614e-09	4.61412e-05	-0.353011
rs2814778	11729291_a_at	SLC25A37	-5.88819	5.93461e-09	4.6333e-05	-0.225297
rs201421746	11737857_a_at	DNAAF1	-5.88659	5.98948e-09	4.67307e-05	-1.3344
rs78571577	11737177_at	SLC25A21	-5.8861	6.00653e-09	4.68328e-05	-0.441902
rs2814778	11755876_a_at	IFRD2	-5.88507	6.04241e-09	4.70815e-05	-0.266189
rs75540417	11722142_a_at	PITPNM1	5.88272	6.12505e-09	4.76941e-05	0.941044
rs117019330	11732993_a_at	RGS4	-5.88243	6.13535e-09	4.77429e-05	-0.262608
rs9603820	11745373_a_at	SNX22	-5.88194	6.15246e-09	4.78447e-05	-0.719248
rs2814778	11750879_a_at	NA	5.88057	6.20148e-09	4.81942e-05	0.296448
rs75540417	11729125_s_at	RCN2	-5.87969	6.23299e-09	4.84073e-05	-0.625215
rs75540417	11725348_x_at	TFDP1	-5.87908	6.25482e-09	4.8545e-05	-1.74018
rs74556234	11740136_a_at	TBXT	-5.8786	6.27217e-09	4.86478e-05	-0.948966
rs75135281	11736685_a_at	FGF5	-5.878	6.29395e-09	4.86809e-05	-0.83986
rs75540417	11722469_a_at	ACSL6	-5.87743	6.31486e-09	4.86809e-05	-2.2305
rs117331810	11736685_a_at	FGF5	-5.87724	6.32165e-09	4.86809e-05	-0.839754
rs9839996	11736685_a_at	FGF5	-5.87724	6.32165e-09	4.86809e-05	-0.839754
rs76089552	11736685_a_at	FGF5	-5.87724	6.32165e-09	4.86809e-05	-0.839754
rs201877628	11736685_a_at	FGF5	-5.87724	6.32165e-09	4.86809e-05	-0.839754
rs76713772	11736685_a_at	FGF5	-5.87724	6.32165e-09	4.86809e-05	-0.839754
rs114450321	11736685_a_at	FGF5	-5.87724	6.32165e-09	4.86809e-05	-0.839754
rs116226558	11736685_a_at	FGF5	-5.87724	6.32165e-09	4.86809e-05	-0.839754
rs76406842	11736685_a_at	FGF5	-5.87724	6.32165e-09	4.86809e-05	-0.839754
rs9984933	11736685_a_at	FGF5	-5.87724	6.32165e-09	4.86809e-05	-0.839754
rs75265799	11745105_a_at	MEI1	5.87689	6.3344e-09	4.87344e-05	0.956347
rs78571577	11733101_at	USP12	-5.87683	6.33683e-09	4.87344e-05	-1.16346
rs16996942	11719438_at	NA	-5.87642	6.35153e-09	4.88158e-05	-1.07989
rs115515568	11736685_a_at	FGF5	-5.87617	6.36089e-09	4.8856e-05	-0.83961
rs7528331	11739230_a_at	ARL4A	-5.87601	6.36681e-09	4.88698e-05	-0.353816
rs7528331	11728839_s_at	TMCC3	5.87428	6.43056e-09	4.93271e-05	0.27325
rs138017690	11737533_a_at	SAE1	-5.87322	6.47013e-09	4.95852e-05	-1.63688
rs75265799	11729631_x_at	AP3M1	5.87315	6.47257e-09	4.95852e-05	0.914807
rs2814778	11719359_a_at	ALDH5A1	-5.87295	6.47999e-09	4.96099e-05	-0.426474
rs76196708	11722768_s_at	RAPGEF5	-5.87178	6.52372e-09	4.99124e-05	-0.576491
rs2814778	11741071_a_at	ANK1	-5.87163	6.52957e-09	4.99249e-05	-0.579276
rs2814778	11730580_s_at	HECW2	5.87094	6.55571e-09	5.00925e-05	0.412253
rs117153530	11747313_a_at	OXA1L	5.87007	6.58843e-09	5.03011e-05	1.19211
rs73615423	11728826_s_at	TRNP1	-5.86999	6.59151e-09	5.03011e-05	-1.87081
rs75990347	11729125_s_at	RCN2	-5.869	6.62919e-09	5.05561e-05	-0.763881
rs75540417	11733029_x_at	AIDA	-5.86803	6.66632e-09	5.07814e-05	-1.40711
rs2814778	11727461_x_at	ZXDC	5.86801	6.66731e-09	5.07814e-05	0.141153
rs2814778	11732501_a_at	TMOD1	-5.86757	6.684e-09	5.08758e-05	-0.572306
rs9603820	11749604_s_at	NA	5.86666	6.7191e-09	5.11101e-05	0.559343
rs2814778	11725463_x_at	MAU2	5.86648	6.72634e-09	5.11323e-05	0.119353
rs2814778	11734344_a_at	TRIM10	-5.86386	6.82857e-09	5.18762e-05	-0.340186
rs2814778	11743067_at	SIAH2	-5.86372	6.83397e-09	5.1884e-05	-0.471937
rs2814778	11726209_a_at	LRRC75A	-5.86332	6.84984e-09	5.19711e-05	-0.314336
rs201008762	11732636_at	HHIPL2	-5.86275	6.87217e-09	5.21071e-05	-0.652155
rs2814778	11745798_x_at	LINC01000	5.86122	6.93289e-09	5.25339e-05	0.191437
rs2814778	11756058_a_at	CEACAM1	5.86067	6.95497e-09	5.26659e-05	0.4041
rs1378833	11734953_at	MBNL3	-5.86056	6.9592e-09	5.26659e-05	-0.290236
rs2814778	11743450_a_at	ELOVL6	-5.85937	7.00731e-09	5.29961e-05	-0.287224
rs9603820	11722971_a_at	NA	5.85894	7.02431e-09	5.30908e-05	0.30891
rs2814778	11757793_s_at	TFPI	-5.8585	7.04222e-09	5.31922e-05	-0.431295
rs79112113	11718779_at	S100A2	-5.85749	7.08311e-09	5.34669e-05	-0.631643
rs2814778	11752958_a_at	MPP1	-5.85692	7.10667e-09	5.36106e-05	-0.341543
rs78571577	11735293_x_at	TNFRSF11A	-5.85556	7.16241e-09	5.39967e-05	-1.07639
rs2814778	11732370_a_at	CUX1	5.8551	7.18143e-09	5.41057e-05	0.219251
rs2971627	11715248_s_at	CRISP2	-5.85404	7.2252e-09	5.43663e-05	-1.18795
rs2911645	11715248_s_at	CRISP2	-5.85404	7.2252e-09	5.43663e-05	-1.18795
rs10487776	11734518_at	PAGE2	-5.85332	7.25526e-09	5.45578e-05	-0.54248
rs78571577	11721426_at	FZD5	-5.85259	7.28573e-09	5.47521e-05	-1.16383
rs7528331	11752701_s_at	NA	-5.85229	7.29836e-09	5.47957e-05	-0.691369
rs2814778	11764077_s_at	EDIL3	-5.85223	7.30078e-09	5.47957e-05	-0.16989
rs76465000	11728039_s_at	CCL8	-5.85172	7.32225e-09	5.49221e-05	-3.3679
rs7528331	11735856_s_at	GYPE	-5.85149	7.33169e-09	5.49551e-05	-0.5313
rs2814778	11737203_a_at	2019-03-08	-5.85139	7.33593e-09	5.49551e-05	-0.472539
rs77001965	11728039_s_at	CCL8	-5.85124	7.34224e-09	5.49676e-05	-3.36762
rs76465000	11725494_at	RSPH9	-5.84882	7.44504e-09	5.56932e-05	-3.63792
rs55997566	11728039_s_at	CCL8	-5.84874	7.44856e-09	5.56932e-05	-3.36625
rs116832035	11728039_s_at	CCL8	-5.84797	7.48145e-09	5.5719e-05	-3.36582
rs114216342	11728039_s_at	CCL8	-5.84797	7.48145e-09	5.5719e-05	-3.36582
rs73633773	11728039_s_at	CCL8	-5.84797	7.48145e-09	5.5719e-05	-3.36582
rs17083871	11728039_s_at	CCL8	-5.84797	7.48145e-09	5.5719e-05	-3.36582
rs79598670	11728039_s_at	CCL8	-5.84797	7.48145e-09	5.5719e-05	-3.36582
rs185302072	11728039_s_at	CCL8	-5.84797	7.48145e-09	5.5719e-05	-3.36582
rs114628552	11728039_s_at	CCL8	-5.84789	7.48495e-09	5.5719e-05	-3.36578
rs9812589	11730536_at	CHST13	5.84721	7.51419e-09	5.59015e-05	0.431456
rs79225353	11728039_s_at	CCL8	-5.84674	7.53486e-09	5.59865e-05	-3.36514
rs115754734	11728039_s_at	CCL8	-5.84673	7.53507e-09	5.59865e-05	-3.36514
rs73145075	11728039_s_at	CCL8	-5.84658	7.5414e-09	5.59984e-05	-3.36506
rs2814778	11718296_a_at	SEMA4B	5.84593	7.56975e-09	5.61737e-05	0.208188
rs115754734	11725494_at	RSPH9	-5.84536	7.59448e-09	5.6322e-05	-3.63584
rs2814778	200070_PM_at	CNPPD1	-5.84519	7.60216e-09	5.63436e-05	-0.198661
rs7528331	11724993_at	RFLNB	5.84502	7.60952e-09	5.63629e-05	0.188803
rs61744238	11728039_s_at	CCL8	-5.84461	7.62753e-09	5.64258e-05	-3.36408
rs77001965	11725494_at	RSPH9	-5.84461	7.62754e-09	5.64258e-05	-3.63539
rs116832035	11725494_at	RSPH9	-5.84317	7.69085e-09	5.66648e-05	-3.63453
rs114216342	11725494_at	RSPH9	-5.84317	7.69085e-09	5.66648e-05	-3.63453
rs73633773	11725494_at	RSPH9	-5.84317	7.69085e-09	5.66648e-05	-3.63453
rs17083871	11725494_at	RSPH9	-5.84317	7.69085e-09	5.66648e-05	-3.63453
rs79598670	11725494_at	RSPH9	-5.84317	7.69085e-09	5.66648e-05	-3.63453
rs185302072	11725494_at	RSPH9	-5.84317	7.69085e-09	5.66648e-05	-3.63453
rs73145075	11725494_at	RSPH9	-5.84303	7.6969e-09	5.66648e-05	-3.63446
rs2814778	11716849_s_at	PREX1	5.843	7.69812e-09	5.66648e-05	0.157617
rs79225353	11725494_at	RSPH9	-5.84286	7.70437e-09	5.66756e-05	-3.63435
rs78571577	11762125_x_at	KIAA0895	-5.84189	7.74729e-09	5.69559e-05	-0.495071
rs2814778	11724606_a_at	MAP2K6	5.84099	7.7877e-09	5.72113e-05	0.203722
rs55997566	11725494_at	RSPH9	-5.84066	7.80217e-09	5.72113e-05	-3.63305
rs9603820	11726180_a_at	SOX6	-5.84066	7.80233e-09	5.72113e-05	-0.501424
rs114628552	11725494_at	RSPH9	-5.84058	7.80571e-09	5.72113e-05	-3.633
rs75540417	11737699_a_at	PCDHGB7	-5.84057	7.80619e-09	5.72113e-05	-0.436235
rs2814778	11719075_s_at	REEP1	-5.83962	7.84895e-09	5.74529e-05	-0.149344
rs2814778	11739782_a_at	SNCA	-5.83952	7.8536e-09	5.74529e-05	-0.470231
rs2814778	11727809_at	FECH	-5.83951	7.8537e-09	5.74529e-05	-0.366553
rs76196708	11723785_s_at	LIMCH1	-5.83751	7.94436e-09	5.80803e-05	-0.671534
rs9603820	11749605_x_at	CYP4F3	5.83689	7.97266e-09	5.82511e-05	0.569432
rs2814778	11718276_x_at	IFRD2	-5.83488	8.06508e-09	5.8854e-05	-0.238399
rs2814778	11719432_at	KIAA0513	5.83488	8.06511e-09	5.8854e-05	0.174342
rs201421746	11723283_a_at	CEACAM1	-5.83427	8.0933e-09	5.90234e-05	-1.78541
rs2814778	11744587_a_at	MACO1	-5.82903	8.33987e-09	6.07558e-05	-0.147196
rs2814778	11724778_at	PGM2L1	-5.82901	8.34112e-09	6.07558e-05	-0.253533
rs113239743	11755127_a_at	TMF1	-5.82857	8.36216e-09	6.08535e-05	-1.73875
rs2814778	11747551_x_at	RBM23	5.82851	8.36479e-09	6.08535e-05	0.16591
rs61744238	11725494_at	RSPH9	-5.8284	8.37023e-09	6.08556e-05	-3.62587
rs2814778	11730498_s_at	MXI1	-5.82518	8.52591e-09	6.19495e-05	-0.299011
rs9603820	11754422_a_at	CARS2	5.82451	8.55887e-09	6.21508e-05	0.303933
rs2814778	11747759_a_at	MOSPD1	-5.82301	8.63247e-09	6.26468e-05	-0.343244
rs17172670	11734384_a_at	AKR1E2	-5.82225	8.67013e-09	6.28816e-05	-0.583895
rs9603820	11757957_s_at	SOX6	-5.82168	8.69824e-09	6.2965e-05	-0.809334
rs117331810	11736782_a_at	RAB11FIP1	5.82095	8.73478e-09	6.2965e-05	1.73193
rs9839996	11736782_a_at	RAB11FIP1	5.82095	8.73478e-09	6.2965e-05	1.73193
rs76089552	11736782_a_at	RAB11FIP1	5.82095	8.73478e-09	6.2965e-05	1.73193
rs201877628	11736782_a_at	RAB11FIP1	5.82095	8.73478e-09	6.2965e-05	1.73193
rs76713772	11736782_a_at	RAB11FIP1	5.82095	8.73478e-09	6.2965e-05	1.73193
rs114450321	11736782_a_at	RAB11FIP1	5.82095	8.73478e-09	6.2965e-05	1.73193
rs116226558	11736782_a_at	RAB11FIP1	5.82095	8.73478e-09	6.2965e-05	1.73193
rs76406842	11736782_a_at	RAB11FIP1	5.82095	8.73478e-09	6.2965e-05	1.73193
rs9984933	11736782_a_at	RAB11FIP1	5.82095	8.73478e-09	6.2965e-05	1.73193
rs75135281	11736782_a_at	RAB11FIP1	5.81972	8.79629e-09	6.33698e-05	1.73158
rs115515568	11736782_a_at	RAB11FIP1	5.81936	8.81484e-09	6.34648e-05	1.73148
rs2814778	11756484_a_at	UVSSA	5.81846	8.85997e-09	6.37509e-05	0.1516
rs16996942	11744590_a_at	TRIO	-5.81796	8.88544e-09	6.38954e-05	-0.684009
rs9603820	11733101_at	USP12	-5.81721	8.92345e-09	6.41298e-05	-0.319162
rs115600982	11762433_at	NA	-5.81663	8.95346e-09	6.43065e-05	-0.304433
rs2814778	11729533_s_at	REM2	5.81616	8.97712e-09	6.44373e-05	0.230874
rs75540417	11730873_a_at	RASSF5	5.81465	9.05517e-09	6.49582e-05	0.492468
rs2814778	11723188_s_at	ADAM19	5.8145	9.06289e-09	6.49742e-05	0.15497
rs200653222	11730551_a_at	STAC	-5.81317	9.13212e-09	6.5431e-05	-1.04817
rs10666077	11728865_at	ZMYND19	-5.81174	9.20699e-09	6.59275e-05	-0.817058
rs2814778	11727118_a_at	CFP	5.8106	9.26699e-09	6.63171e-05	0.196494
rs75540417	11758984_at	ZRANB1	-5.80975	9.31199e-09	6.65988e-05	-0.991698
rs75540417	11746778_a_at	ITSN1	-5.80947	9.32699e-09	6.66659e-05	-0.966249
rs9603820	11734953_at	MBNL3	-5.80814	9.39823e-09	6.71345e-05	-0.436665
rs113239743	11724295_at	TSPAN18	-5.80781	9.41607e-09	6.72214e-05	-1.66985
rs2814778	11737954_s_at	SLC16A5	5.80737	9.43989e-09	6.73413e-05	0.229626
rs201421746	11745689_a_at	CMPK2	-5.80729	9.44423e-09	6.73413e-05	-1.66859
rs2814778	11749894_a_at	DCK	-5.80639	9.49248e-09	6.76446e-05	-0.311928
rs7528331	11752881_s_at	NA	-5.80541	9.5456e-09	6.79822e-05	-0.657363
rs115619982	11736949_at	THEM5	-5.80468	9.58553e-09	6.82256e-05	-3.33095
rs2814778	11731997_at	TRIM58	-5.80453	9.59417e-09	6.8246e-05	-0.525486
rs2814778	11728670_a_at	UBE2H	-5.80416	9.61414e-09	6.83471e-05	-0.327891
rs1378833	11728826_s_at	TRNP1	-5.80352	9.64961e-09	6.8558e-05	-0.276004
rs28835572	11747673_a_at	SACM1L	-5.80322	9.66596e-09	6.8592e-05	-1.01533
rs111833320	11747673_a_at	SACM1L	-5.80322	9.66596e-09	6.8592e-05	-1.01533
rs2814778	11728523_a_at	MYCL	5.80234	9.71469e-09	6.88733e-05	0.207622
rs10487776	11762075_at	NA	-5.80229	9.71724e-09	6.88733e-05	-0.472871
rs77108619	11737831_a_at	FNBP1L	-5.80099	9.78947e-09	6.93437e-05	-0.787306
rs75540417	11734784_a_at	CLIC2	-5.79862	9.92257e-09	7.02445e-05	-1.76111
rs9603820	11759749_at	KLF3	-5.79797	9.9597e-09	7.04653e-05	-0.65617
rs9812589	11736463_x_at	LILRA2	5.79733	9.99602e-09	7.06474e-05	0.292295
rs9603820	11721818_s_at	SH3BP5L	5.79721	1.00029e-08	7.06474e-05	0.286356
rs75265799	11752679_a_at	TAB3	-5.79716	1.00055e-08	7.06474e-05	-0.769388
rs1378833	11752701_s_at	NA	-5.7971	1.00093e-08	7.06474e-05	-0.549829
rs16996942	11744121_a_at	LGALS4	-5.79483	1.01396e-08	7.15244e-05	-0.875844
rs9603820	11736462_a_at	LILRA2	5.79389	1.01938e-08	7.18569e-05	0.397192
rs115619982	11715408_x_at	PSMB4	5.79381	1.01989e-08	7.18569e-05	0.346363
rs9900782	11738851_a_at	MMP16	-5.79354	1.0214e-08	7.19208e-05	-0.488124
rs9603820	11728669_a_at	UBE2H	-5.79129	1.03462e-08	7.28078e-05	-0.469027
rs9603820	11746522_s_at	NA	-5.79118	1.03523e-08	7.28078e-05	-0.533444
rs2814778	11757441_s_at	SRRD	-5.79039	1.03992e-08	7.30867e-05	-0.332238
rs12573886	11741749_x_at	LRRC2	-5.7903	1.04043e-08	7.30867e-05	-0.684061
rs74556234	11753670_a_at	AP1S3	-5.7888	1.04936e-08	7.36704e-05	-0.535272
rs75740589	11718056_a_at	BTBD3	-5.78826	1.05263e-08	7.38562e-05	-0.604439
rs2814778	11754158_a_at	CFL1	5.78768	1.05611e-08	7.4034e-05	0.149488
rs2814778	11752008_at	CDAN1	5.78763	1.05641e-08	7.4034e-05	0.199589
rs114182264	11721290_a_at	F3	-5.78693	1.06058e-08	7.42821e-05	-0.352287
rs2814778	11758596_s_at	ZRANB1	-5.78639	1.06387e-08	7.44685e-05	-0.194729
rs9603820	11763311_a_at	CSNK1D	5.78628	1.06452e-08	7.44697e-05	0.176778
rs1378833	11729874_at	SIGLEC9	5.78395	1.07875e-08	7.54209e-05	0.229927
rs9812589	11761102_x_at	FCAR	5.78268	1.08654e-08	7.5921e-05	0.371043
rs115619982	11721349_s_at	NA	-5.78224	1.0893e-08	7.60689e-05	-3.9881
rs2814778	11740091_s_at	TMEM163	-5.78129	1.09522e-08	7.61926e-05	-0.187657
rs117331810	11760453_x_at	CFHR3	-5.78092	1.09751e-08	7.61926e-05	-0.589054
rs9839996	11760453_x_at	CFHR3	-5.78092	1.09751e-08	7.61926e-05	-0.589054
rs76089552	11760453_x_at	CFHR3	-5.78092	1.09751e-08	7.61926e-05	-0.589054
rs201877628	11760453_x_at	CFHR3	-5.78092	1.09751e-08	7.61926e-05	-0.589054
rs76713772	11760453_x_at	CFHR3	-5.78092	1.09751e-08	7.61926e-05	-0.589054
rs114450321	11760453_x_at	CFHR3	-5.78092	1.09751e-08	7.61926e-05	-0.589054
rs116226558	11760453_x_at	CFHR3	-5.78092	1.09751e-08	7.61926e-05	-0.589054
rs76406842	11760453_x_at	CFHR3	-5.78092	1.09751e-08	7.61926e-05	-0.589054
rs9984933	11760453_x_at	CFHR3	-5.78092	1.09751e-08	7.61926e-05	-0.589054
rs75135281	11760453_x_at	CFHR3	-5.78064	1.09922e-08	7.6267e-05	-0.589029
rs115619982	11741884_a_at	SMOX	-5.77964	1.10553e-08	7.66599e-05	-0.911996
rs115515568	11760453_x_at	CFHR3	-5.7787	1.11142e-08	7.70227e-05	-0.588839
rs2814778	11731446_s_at	SNCA	-5.77816	1.11488e-08	7.7173e-05	-0.618066
rs2814778	11738714_s_at	NA	-5.77815	1.11489e-08	7.7173e-05	-0.12079
rs1378833	11719392_a_at	RNF14	-5.77762	1.1183e-08	7.73641e-05	-0.378846
rs117019330	11737265_x_at	CCDC30	-5.77666	1.12441e-08	7.7741e-05	-0.321997
rs2814778	11754486_a_at	NME4	-5.77566	1.1308e-08	7.81376e-05	-0.34081
rs9603820	11720057_a_at	POLR1D	-5.77519	1.13383e-08	7.82983e-05	-0.217675
rs17172670	11753277_a_at	AKR1E2	-5.77509	1.13445e-08	7.82983e-05	-0.459649
rs2814778	11733394_at	TRPM6	5.77498	1.13521e-08	7.83052e-05	0.309929
rs75135281	11730892_at	ACTL7A	-5.77484	1.13608e-08	7.83198e-05	-0.79535
rs2814778	11735236_x_at	SNX7	-5.77388	1.1423e-08	7.86987e-05	-0.0995936
rs2814778	11734938_x_at	CSF2RA	5.77369	1.14356e-08	7.86987e-05	0.218971
rs117331810	11730892_at	ACTL7A	-5.77287	1.14889e-08	7.86987e-05	-0.795088
rs9839996	11730892_at	ACTL7A	-5.77287	1.14889e-08	7.86987e-05	-0.795088
rs76089552	11730892_at	ACTL7A	-5.77287	1.14889e-08	7.86987e-05	-0.795088
rs201877628	11730892_at	ACTL7A	-5.77287	1.14889e-08	7.86987e-05	-0.795088
rs76713772	11730892_at	ACTL7A	-5.77287	1.14889e-08	7.86987e-05	-0.795088
rs114450321	11730892_at	ACTL7A	-5.77287	1.14889e-08	7.86987e-05	-0.795088
rs116226558	11730892_at	ACTL7A	-5.77287	1.14889e-08	7.86987e-05	-0.795088
rs76406842	11730892_at	ACTL7A	-5.77287	1.14889e-08	7.86987e-05	-0.795088
rs9984933	11730892_at	ACTL7A	-5.77287	1.14889e-08	7.86987e-05	-0.795088
rs2814778	11746648_a_at	IKBKB	5.772	1.15455e-08	7.90407e-05	0.185544
rs9603820	11759824_a_at	LILRA1	5.77107	1.16064e-08	7.94119e-05	0.280616
rs115515568	11730892_at	ACTL7A	-5.76989	1.16845e-08	7.98997e-05	-0.794698
rs7528331	11736463_x_at	LILRA2	5.76929	1.17249e-08	8.01231e-05	0.317549
rs2814778	11725440_a_at	LPAR2	5.7692	1.17307e-08	8.01231e-05	0.238987
rs75540417	11763692_at	VTI1B	-5.76879	1.1758e-08	8.02636e-05	-1.39675
rs9603820	11727461_x_at	ZXDC	5.7685	1.1777e-08	8.03468e-05	0.21378
rs2814778	11740218_a_at	SIRPB1	5.76809	1.18046e-08	8.04886e-05	0.219105
rs16996942	11740900_a_at	C4orf45	-5.76723	1.18626e-08	8.0807e-05	-0.958006
rs76196708	11736855_a_at	ATP6V1C2	-5.76719	1.18649e-08	8.0807e-05	-0.508422
rs2814778	11738523_a_at	NLRP3	5.76682	1.18904e-08	8.09341e-05	0.240332
rs2814778	11720062_s_at	IER3	5.76659	1.19059e-08	8.09932e-05	0.235707
rs1378833	11728502_a_at	CD300C	5.76613	1.1937e-08	8.11013e-05	0.338348
rs1378833	11725749_a_at	GAL	-5.76612	1.19377e-08	8.11013e-05	-0.133028
rs2814778	11755663_s_at	NA	-5.76605	1.19423e-08	8.11013e-05	-0.177984
rs2814778	11749724_a_at	MEGF9	5.76474	1.20311e-08	8.16572e-05	0.232439
rs78571577	11748139_a_at	RNF14	-5.76357	1.21115e-08	8.21561e-05	-1.34743
rs201421746	11720388_s_at	C1QC	-5.76337	1.21254e-08	8.22029e-05	-1.28995
rs17172670	11732237_a_at	GYPA	-5.76286	1.21601e-08	8.23914e-05	-0.859789
rs9603820	11752474_a_at	SFRP5	-5.76239	1.21928e-08	8.25654e-05	-0.232072
rs2814778	11726120_a_at	BMP2K	-5.76186	1.22295e-08	8.27664e-05	-0.27714
rs9603820	11731134_a_at	LTB4R	5.76024	1.2342e-08	8.34352e-05	0.455242
rs2814778	11742819_at	PLAUR	5.76024	1.23424e-08	8.34352e-05	0.229715
rs7528331	11736836_at	TPCN2	5.75997	1.23612e-08	8.35148e-05	0.289294
rs2814778	11722106_a_at	PCNX1	5.75957	1.23892e-08	8.36562e-05	0.193271
rs2814778	11720671_x_at	SNX7	-5.75913	1.24203e-08	8.3786e-05	-0.095636
rs75265799	11734785_at	CLIC2	-5.7591	1.24226e-08	8.3786e-05	-0.909463
rs9603820	11747125_a_at	RIOK3	-5.75798	1.25016e-08	8.4271e-05	-0.64675
rs2814778	11732455_at	KCNJ15	5.75676	1.25883e-08	8.48072e-05	0.257736
rs9603820	11759342_at	FMN1	-5.75644	1.26111e-08	8.49125e-05	-1.17643
rs9603820	11753170_a_at	CD300C	5.75631	1.26199e-08	8.49235e-05	0.448236
rs9603820	11752300_a_at	PADI2	5.75587	1.2652e-08	8.5091e-05	0.709319
rs7528331	11754046_a_at	SNX22	-5.75552	1.26765e-08	8.52075e-05	-0.278086
rs76196708	11733832_a_at	MAP2	-5.755	1.27143e-08	8.54129e-05	-0.504457
rs73615423	11721198_a_at	TMEM119	-5.754	1.27862e-08	8.5827e-05	-2.12726
rs73615423	11752277_a_at	STON2	-5.75394	1.27904e-08	8.5827e-05	-0.768088
rs2814778	11751360_x_at	REXO2	-5.75285	1.28701e-08	8.63122e-05	-0.230526
rs73615423	11728825_at	TRNP1	-5.75275	1.28773e-08	8.63122e-05	-1.39977
rs2814778	11757664_s_at	MKRN1	-5.75139	1.29769e-08	8.69309e-05	-0.126226
rs2814778	11762823_x_at	NA	5.751	1.30051e-08	8.70704e-05	0.180779
rs115619982	11761686_at	IFIH1	-5.7501	1.30718e-08	8.74675e-05	-1.8833
rs9812589	11720894_a_at	SOS1	-5.74975	1.30978e-08	8.75809e-05	-0.362471
rs2814778	11742107_a_at	PPT1	5.74967	1.31035e-08	8.75809e-05	0.187257
rs1378833	11717123_a_at	PPP1R12B	5.749	1.31533e-08	8.7864e-05	0.29384
rs2814778	11753984_x_at	LINC00654	-5.7486	1.31831e-08	8.80135e-05	-0.125572
rs9603820	11743344_a_at	RMND5A	-5.7481	1.3221e-08	8.82167e-05	-0.422828
rs2814778	11746402_x_at	ZFAND5	-5.74766	1.32534e-08	8.83808e-05	-0.184901
rs2814778	11717628_a_at	BIRC2	-5.74757	1.32605e-08	8.83808e-05	-0.225136
rs2814778	11759618_a_at	SLC25A37	-5.7474	1.32733e-08	8.84164e-05	-0.164167
rs2814778	11763259_x_at	CFL1	5.74645	1.3345e-08	8.88435e-05	0.123929
rs1378833	11755120_a_at	PSME4	-5.74576	1.33966e-08	8.91326e-05	-0.171932
rs2814778	11719006_at	ANKH	-5.74567	1.34034e-08	8.91326e-05	-0.322804
rs113239743	11739500_a_at	APOPT1	-5.74546	1.34195e-08	8.91891e-05	-1.18036
rs201421746	11760253_x_at	IFI44	-5.74137	1.37334e-08	9.12232e-05	-2.74134
rs78571577	11730059_s_at	HNF4A	-5.74128	1.37409e-08	9.12232e-05	-0.638414
rs117153530	11755881_a_at	EXOC3L1	-5.74035	1.38131e-08	9.16507e-05	-0.766622
rs118186656	11757988_s_at	PRUNE2	-5.73968	1.38656e-08	9.19479e-05	-1.34956
rs2814778	11715745_a_at	KIAA1191	-5.73895	1.39229e-08	9.22761e-05	-0.140782
rs2814778	11748909_a_at	BNIP3L	-5.73817	1.39839e-08	9.26283e-05	-0.362557
rs115619982	11726498_at	LIF	-5.73807	1.39919e-08	9.26297e-05	-0.512846
rs2814778	11715643_a_at	ATP6AP2	5.73533	1.42102e-08	9.40227e-05	0.204863
rs2814778	11716072_s_at	ATP6V1B2	5.7345	1.42773e-08	9.43934e-05	0.0875599
rs2814778	11748416_a_at	DCAF6	-5.73444	1.42822e-08	9.43934e-05	-0.322685
rs12573886	11715497_a_at	OXA1L	5.73398	1.43191e-08	9.45843e-05	0.38205
rs75540417	11731268_a_at	NUP98	-5.73367	1.43445e-08	9.46992e-05	-1.04423
rs76465000	11736134_a_at	OAS2	-5.73265	1.44274e-08	9.51939e-05	-3.97534
rs74556234	11755331_a_at	ANK2	-5.73174	1.45016e-08	9.56297e-05	-1.031
rs75540417	11735856_s_at	GYPE	-5.73162	1.45108e-08	9.56372e-05	-2.28997
rs77001965	11736134_a_at	OAS2	-5.73089	1.45708e-08	9.59774e-05	-3.97416
rs9603820	11752626_a_at	PBX1	-5.7308	1.45786e-08	9.59774e-05	-0.665131
rs76196708	11719092_at	DUSP26	-5.7306	1.45953e-08	9.60337e-05	-0.693622
rs7528331	11742315_s_at	NA	-5.72979	1.46616e-08	9.64167e-05	-0.68076
rs2814778	11740714_a_at	SLC1A5	-5.72913	1.47162e-08	9.66712e-05	-0.335777
rs16996942	11736293_a_at	SPATS2L	-5.72908	1.47208e-08	9.66712e-05	-2.03966
rs115754734	11736134_a_at	OAS2	-5.72903	1.47248e-08	9.66712e-05	-3.97292
rs115619982	11743066_s_at	PTDSS1	5.72794	1.48153e-08	9.69041e-05	0.607557
rs9603820	11758331_s_at	NA	5.72794	1.48156e-08	9.69041e-05	0.766205
rs114628552	11736134_a_at	OAS2	-5.72768	1.48377e-08	9.69041e-05	-3.97203
rs2814778	11731986_a_at	NA	-5.72762	1.48423e-08	9.69041e-05	-0.102145
rs116832035	11736134_a_at	OAS2	-5.72759	1.48452e-08	9.69041e-05	-3.97196
rs114216342	11736134_a_at	OAS2	-5.72759	1.48452e-08	9.69041e-05	-3.97196
rs73633773	11736134_a_at	OAS2	-5.72759	1.48452e-08	9.69041e-05	-3.97196
rs17083871	11736134_a_at	OAS2	-5.72759	1.48452e-08	9.69041e-05	-3.97196
rs79598670	11736134_a_at	OAS2	-5.72759	1.48452e-08	9.69041e-05	-3.97196
rs185302072	11736134_a_at	OAS2	-5.72759	1.48452e-08	9.69041e-05	-3.97196
rs7528331	11715418_x_at	SKP1	-5.72732	1.48676e-08	9.69041e-05	-0.189132
rs73145075	11736134_a_at	OAS2	-5.72731	1.48688e-08	9.69041e-05	-3.97178
rs78571577	11729571_a_at	FAM83A	-5.72725	1.48732e-08	9.69041e-05	-2.2295
rs79225353	11736134_a_at	OAS2	-5.72723	1.48748e-08	9.69041e-05	-3.97173
rs2814778	11715633_x_at	MAF1	-5.72617	1.49642e-08	9.74327e-05	-0.230758
rs1378833	11756238_s_at	SLC2A1	-5.72538	1.50314e-08	9.78165e-05	-0.206187
rs9603820	11763149_a_at	GYPB	-5.72523	1.50438e-08	9.78433e-05	-0.329489
rs55997566	11736134_a_at	OAS2	-5.72438	1.51162e-08	9.82074e-05	-3.96984
rs2814778	11720551_a_at	IFFO1	5.72438	1.51163e-08	9.82074e-05	0.168509
rs9812589	11729853_at	PADI4	5.72284	1.52482e-08	9.90101e-05	0.368991
rs9603820	11731986_a_at	NA	-5.72263	1.52661e-08	9.90715e-05	-0.157119
rs2814778	11718002_at	VSIR	5.72198	1.53221e-08	9.93804e-05	0.167969
rs1378833	11720218_a_at	MAP3K3	5.72155	1.53591e-08	9.95658e-05	0.113675
rs1378833	11731452_s_at	SEC62	-5.72049	1.54513e-08	0.000100109	-0.404804
rs1378833	11759092_at	USP12	-5.71938	1.55484e-08	0.000100671	-0.357691
rs1378833	11731947_at	PAQR9	-5.7193	1.5555e-08	0.000100671	-0.313817
rs7528331	11763311_a_at	CSNK1D	5.71887	1.55927e-08	0.00010086	0.143543
rs115619982	200089_PM_s_at	NA	5.71874	1.56044e-08	0.00010088	0.364262
rs7528331	11761101_at	FCAR	5.71794	1.56751e-08	0.000101282	0.403322
rs2814778	11727857_a_at	NUP50	5.71669	1.57852e-08	0.000101938	0.177173
rs1378833	11730241_at	SLC2A12	-5.7155	1.58921e-08	0.000102572	-0.320905
rs7528331	11724237_a_at	LAT2	5.71523	1.59155e-08	0.000102667	0.205858
rs2814778	11757367_s_at	NA	5.71484	1.59509e-08	0.00010284	0.213572
rs2814778	11715632_at	MAF1	-5.71438	1.59925e-08	0.000103051	-0.231991
rs61744238	11736134_a_at	OAS2	-5.71414	1.60137e-08	0.000103097	-3.96316
rs75147441	11728825_at	TRNP1	-5.71401	1.60256e-08	0.000103097	-1.39074
rs75949790	11728825_at	TRNP1	-5.71401	1.60256e-08	0.000103097	-1.39074
rs2814778	11747790_a_at	TANGO2	-5.71378	1.60462e-08	0.0001031	-0.223874
rs117331810	11757945_s_at	TP53BP2	5.71304	1.61132e-08	0.0001031	1.75801
rs9839996	11757945_s_at	TP53BP2	5.71304	1.61132e-08	0.0001031	1.75801
rs76089552	11757945_s_at	TP53BP2	5.71304	1.61132e-08	0.0001031	1.75801
rs201877628	11757945_s_at	TP53BP2	5.71304	1.61132e-08	0.0001031	1.75801
rs76713772	11757945_s_at	TP53BP2	5.71304	1.61132e-08	0.0001031	1.75801
rs114450321	11757945_s_at	TP53BP2	5.71304	1.61132e-08	0.0001031	1.75801
rs116226558	11757945_s_at	TP53BP2	5.71304	1.61132e-08	0.0001031	1.75801
rs76406842	11757945_s_at	TP53BP2	5.71304	1.61132e-08	0.0001031	1.75801
rs9984933	11757945_s_at	TP53BP2	5.71304	1.61132e-08	0.0001031	1.75801
rs115515568	11757945_s_at	TP53BP2	5.7129	1.61264e-08	0.000103129	1.75797
rs2814778	11746965_a_at	ANPEP	5.7127	1.61443e-08	0.000103188	0.312436
rs75540417	11727498_at	ZRANB1	-5.71247	1.61648e-08	0.000103263	-1.06805
rs2814778	11717905_a_at	STAU1	-5.71211	1.6198e-08	0.000103419	-0.216105
rs75135281	11757945_s_at	TP53BP2	5.71107	1.62932e-08	0.000103799	1.75743
rs117331810	11749324_a_at	KCTD15	-5.7105	1.6345e-08	0.000103799	-0.822328
rs9839996	11749324_a_at	KCTD15	-5.7105	1.6345e-08	0.000103799	-0.822328
rs76089552	11749324_a_at	KCTD15	-5.7105	1.6345e-08	0.000103799	-0.822328
rs201877628	11749324_a_at	KCTD15	-5.7105	1.6345e-08	0.000103799	-0.822328
rs76713772	11749324_a_at	KCTD15	-5.7105	1.6345e-08	0.000103799	-0.822328
rs114450321	11749324_a_at	KCTD15	-5.7105	1.6345e-08	0.000103799	-0.822328
rs116226558	11749324_a_at	KCTD15	-5.7105	1.6345e-08	0.000103799	-0.822328
rs76406842	11749324_a_at	KCTD15	-5.7105	1.6345e-08	0.000103799	-0.822328
rs9984933	11749324_a_at	KCTD15	-5.7105	1.6345e-08	0.000103799	-0.822328
rs115515568	11749324_a_at	KCTD15	-5.70919	1.64666e-08	0.000104514	-0.822148
rs75135281	11749324_a_at	KCTD15	-5.70901	1.6483e-08	0.000104563	-0.822124
rs61744238	11725460_x_at	S100A7	-5.70831	1.65481e-08	0.000104919	-1.64511
rs9603820	11721931_s_at	TMCC2	-5.70796	1.65803e-08	0.000105067	-0.699687
rs9603820	11730499_a_at	MXI1	-5.70531	1.68298e-08	0.000106399	-0.677343
rs115515568	11758971_s_at	FAM131C	-5.70505	1.68543e-08	0.000106399	-1.0282
rs117331810	11758971_s_at	FAM131C	-5.70468	1.68893e-08	0.000106399	-1.02813
rs9839996	11758971_s_at	FAM131C	-5.70468	1.68893e-08	0.000106399	-1.02813
rs76089552	11758971_s_at	FAM131C	-5.70468	1.68893e-08	0.000106399	-1.02813
rs201877628	11758971_s_at	FAM131C	-5.70468	1.68893e-08	0.000106399	-1.02813
rs76713772	11758971_s_at	FAM131C	-5.70468	1.68893e-08	0.000106399	-1.02813
rs114450321	11758971_s_at	FAM131C	-5.70468	1.68893e-08	0.000106399	-1.02813
rs116226558	11758971_s_at	FAM131C	-5.70468	1.68893e-08	0.000106399	-1.02813
rs76406842	11758971_s_at	FAM131C	-5.70468	1.68893e-08	0.000106399	-1.02813
rs9984933	11758971_s_at	FAM131C	-5.70468	1.68893e-08	0.000106399	-1.02813
rs75135281	11758971_s_at	FAM131C	-5.70457	1.68999e-08	0.000106409	-1.02811
rs76228983	11722455_a_at	ZNF655	5.70354	1.69979e-08	0.00010697	0.484262
rs117153530	11737857_a_at	DNAAF1	-5.70336	1.70153e-08	0.000107022	-1.29464
rs115600982	11718984_a_at	KLHL21	5.70307	1.7043e-08	0.000107139	0.604223
rs79225353	11725460_x_at	S100A7	-5.70229	1.71178e-08	0.000107529	-1.64339
rs2814778	11757638_s_at	CD93	5.70223	1.71231e-08	0.000107529	0.171712
rs76465000	11725460_x_at	S100A7	-5.70147	1.71965e-08	0.000107907	-1.64318
rs1378833	11733768_x_at	LILRA2	5.70136	1.72077e-08	0.000107907	0.157573
rs2814778	11729582_s_at	CA1	-5.70133	1.72106e-08	0.000107907	-0.741701
rs115754734	11725460_x_at	S100A7	-5.70103	1.7239e-08	0.000107943	-1.64305
rs2814778	11720349_at	ROPN1L	5.70098	1.72442e-08	0.000107943	0.334376
rs55997566	11725460_x_at	S100A7	-5.70066	1.72754e-08	0.000107943	-1.64295
rs116832035	11725460_x_at	S100A7	-5.70038	1.73024e-08	0.000107943	-1.64286
rs114216342	11725460_x_at	S100A7	-5.70038	1.73024e-08	0.000107943	-1.64286
rs73633773	11725460_x_at	S100A7	-5.70038	1.73024e-08	0.000107943	-1.64286
rs17083871	11725460_x_at	S100A7	-5.70038	1.73024e-08	0.000107943	-1.64286
rs79598670	11725460_x_at	S100A7	-5.70038	1.73024e-08	0.000107943	-1.64286
rs185302072	11725460_x_at	S100A7	-5.70038	1.73024e-08	0.000107943	-1.64286
rs117153530	11758619_s_at	LIF	-5.70033	1.73075e-08	0.000107943	-0.765168
rs9603820	11721900_at	FCN1	5.70008	1.73316e-08	0.000108036	0.257877
rs77001965	11725460_x_at	S100A7	-5.6999	1.7349e-08	0.000108088	-1.64273
rs114628552	11725460_x_at	S100A7	-5.69972	1.73665e-08	0.00010814	-1.64269
rs73145075	11725460_x_at	S100A7	-5.69956	1.73823e-08	0.000108182	-1.64264
rs2814778	11729504_a_at	AOC2	5.69939	1.73987e-08	0.000108226	0.29293
rs76465000	11736293_a_at	SPATS2L	-5.69841	1.7495e-08	0.000108769	-3.50992
rs115619982	11736136_s_at	OAS2	-5.69819	1.7516e-08	0.000108798	-2.61735
rs1378833	11757341_s_at	OPTN	-5.69817	1.75182e-08	0.000108798	-0.357758
rs2814778	11755391_x_at	H2AFY	5.69808	1.75274e-08	0.000108798	0.080553
rs2814778	11726132_a_at	MYOM1	5.69686	1.76477e-08	0.000109488	0.190175
rs9603820	11729677_a_at	SLC26A8	5.69663	1.76706e-08	0.000109564	0.711594
rs2814778	11755756_a_at	NHSL1	5.69647	1.76866e-08	0.000109564	0.33372
rs1378833	11749618_x_at	LILRA2	5.69646	1.76877e-08	0.000109564	0.27749
rs77001965	11736293_a_at	SPATS2L	-5.6957	1.77633e-08	0.000109975	-3.50831
rs2814778	11720379_s_at	GALNS	5.69515	1.78176e-08	0.000110253	0.161074
rs114628552	11736293_a_at	SPATS2L	-5.695	1.78327e-08	0.000110289	-3.5079
rs76196708	11740959_a_at	DMD	-5.69487	1.78459e-08	0.000110313	-0.753038
rs117980903	11719118_a_at	TPBG	-5.69445	1.78881e-08	0.000110516	-0.812784
rs2814778	11754758_a_at	MKRN1	-5.69422	1.79113e-08	0.000110557	-0.347945
rs2814778	11727672_a_at	MICAL2	-5.6942	1.79133e-08	0.000110557	-0.366129
rs115754734	11736293_a_at	SPATS2L	-5.69404	1.79294e-08	0.000110598	-3.50733
rs116832035	11736293_a_at	SPATS2L	-5.69346	1.79876e-08	0.000110612	-3.50699
rs114216342	11736293_a_at	SPATS2L	-5.69346	1.79876e-08	0.000110612	-3.50699
rs73633773	11736293_a_at	SPATS2L	-5.69346	1.79876e-08	0.000110612	-3.50699
rs17083871	11736293_a_at	SPATS2L	-5.69346	1.79876e-08	0.000110612	-3.50699
rs79598670	11736293_a_at	SPATS2L	-5.69346	1.79876e-08	0.000110612	-3.50699
rs185302072	11736293_a_at	SPATS2L	-5.69346	1.79876e-08	0.000110612	-3.50699
rs2814778	11723050_a_at	HSPA6	5.69316	1.80179e-08	0.00011074	0.248609
rs76841445	11716384_at	CCL2	-5.69299	1.80353e-08	0.000110771	-1.51062
rs7528331	11741786_a_at	TSPAN16	5.69293	1.80416e-08	0.000110771	0.483347
rs73145075	11736293_a_at	SPATS2L	-5.69283	1.80516e-08	0.000110776	-3.50662
rs79225353	11736293_a_at	SPATS2L	-5.69192	1.81436e-08	0.000111282	-3.50608
rs2814778	11750979_a_at	ADGRG3	5.69151	1.81854e-08	0.000111423	0.328763
rs9812589	11761101_at	FCAR	5.69126	1.82112e-08	0.000111423	0.367878
rs2814778	11715447_at	TALDO1	5.69113	1.82247e-08	0.000111423	0.0773543
rs2814778	11715602_s_at	SPARC	-5.69089	1.82494e-08	0.000111423	-0.505409
rs117331810	11753711_x_at	DIO1	-5.6905	1.82889e-08	0.000111423	-0.699166
rs9839996	11753711_x_at	DIO1	-5.6905	1.82889e-08	0.000111423	-0.699166
rs76089552	11753711_x_at	DIO1	-5.6905	1.82889e-08	0.000111423	-0.699166
rs201877628	11753711_x_at	DIO1	-5.6905	1.82889e-08	0.000111423	-0.699166
rs76713772	11753711_x_at	DIO1	-5.6905	1.82889e-08	0.000111423	-0.699166
rs114450321	11753711_x_at	DIO1	-5.6905	1.82889e-08	0.000111423	-0.699166
rs116226558	11753711_x_at	DIO1	-5.6905	1.82889e-08	0.000111423	-0.699166
rs76406842	11753711_x_at	DIO1	-5.6905	1.82889e-08	0.000111423	-0.699166
rs9984933	11753711_x_at	DIO1	-5.6905	1.82889e-08	0.000111423	-0.699166
rs7528331	11728926_at	NFAM1	5.69004	1.83366e-08	0.000111656	0.153708
rs115515568	11753711_x_at	DIO1	-5.68964	1.83776e-08	0.000111849	-0.699065
rs7528331	11734870_a_at	NADK	5.68948	1.83939e-08	0.00011189	0.130654
rs75135281	11753711_x_at	DIO1	-5.68931	1.8411e-08	0.000111937	-0.699027
rs55997566	11736293_a_at	SPATS2L	-5.68909	1.84344e-08	0.000112022	-3.50441
rs9603820	11763884_x_at	NA	5.68735	1.86148e-08	0.00011306	0.486855
rs117153530	11757066_s_at	ING5	-5.68707	1.86443e-08	0.000113181	-0.677567
rs61744238	11736293_a_at	SPATS2L	-5.68663	1.869e-08	0.0001134	-3.50307
rs2814778	11747956_a_at	FAM117A	-5.68643	1.87108e-08	0.000113468	-0.215785
rs10487776	11737177_at	SLC25A21	-5.68584	1.87737e-08	0.000113792	-0.42751
rs117153530	11732086_a_at	OTOF	-5.68555	1.8804e-08	0.000113917	-1.63017
rs115156754	11729474_x_at	FANCA	-5.68357	1.90131e-08	0.000115125	-0.677915
rs7528331	11726179_a_at	SOX6	-5.68311	1.90627e-08	0.000115366	-0.756036
rs78571577	11739120_a_at	XPO7	-5.68301	1.90731e-08	0.00011537	-0.996461
rs75540417	11721928_a_at	TMCC2	-5.68185	1.91974e-08	0.000116063	-1.63592
rs115619982	11723236_at	IFI44L	-5.67953	1.94483e-08	0.00011752	-5.05214
rs2814778	11734784_a_at	CLIC2	-5.6791	1.94961e-08	0.000117748	-0.31063
rs2814778	11739303_a_at	DLC1	-5.67885	1.95226e-08	0.000117848	-0.318557
rs2814778	11722945_a_at	GLT1D1	5.67841	1.95714e-08	0.000118082	0.224043
rs115600982	11754658_a_at	WSCD2	-5.6782	1.95938e-08	0.000118157	-0.507008
rs9603820	11724237_a_at	LAT2	5.67795	1.96213e-08	0.000118263	0.249128
rs117153530	11732537_x_at	MSS51	5.67762	1.96584e-08	0.000118426	1.47767
rs75540417	11739937_a_at	DYRK3	-5.67713	1.97123e-08	0.000118643	-1.806
rs2814778	11746280_a_at	SYTL3	5.67711	1.97143e-08	0.000118643	0.191954
rs115619982	11715419_at	LY6E	-5.67701	1.97255e-08	0.00011865	-2.7969
rs2814778	11722823_a_at	SKP1	-5.67638	1.97944e-08	0.000119004	-0.156352
rs117153530	11726668_at	MFSD8	5.67609	1.9827e-08	0.000119139	1.69654
rs78571577	11757968_s_at	TERF2IP	-5.67525	1.99201e-08	0.000119638	-0.657597
rs2814778	11753422_a_at	BNIP3L	-5.67446	2.00092e-08	0.000120112	-0.360747
rs2814778	11759111_x_at	HIST1H2BH	-5.67433	2.00235e-08	0.000120132	-0.279577
rs2814778	11731001_at	AP5B1	5.67425	2.00328e-08	0.000120132	0.266992
rs2814778	11756210_a_at	RCL1	-5.67347	2.01194e-08	0.000120586	-0.207801
rs2814778	11730952_a_at	PDK3	5.67339	2.01289e-08	0.000120586	0.184187
rs78571577	11743928_at	NSUN3	-5.67279	2.01969e-08	0.000120933	-1.45429
rs2814778	11740932_a_at	CSF3R	5.67214	2.02702e-08	0.00012131	0.153418
rs115619982	11753423_a_at	NA	-5.67187	2.03005e-08	0.00012143	-1.31589
rs2814778	11758722_at	DCTN2	5.67033	2.04765e-08	0.000122421	0.152429
rs115619982	11728821_a_at	HEPACAM2	-5.66932	2.05919e-08	0.000123049	-1.8596
rs74861994	11726937_at	ST18	-5.66906	2.06222e-08	0.000123168	-0.226187
rs114699955	11729571_a_at	FAM83A	-5.66879	2.06538e-08	0.000123294	-1.91323
rs115619982	11738597_x_at	CTCFL	-5.66838	2.07014e-08	0.000123487	-1.34093
rs117153530	11737681_a_at	SLC26A10	-5.66833	2.0707e-08	0.000123487	-0.974056
rs2814778	11745828_x_at	BNIP3L	-5.66704	2.08568e-08	0.000124318	-0.229193
rs2814778	11716401_a_at	SELENBP1	-5.66324	2.1304e-08	0.00012692	-0.552425
rs2814778	11725760_at	BORCS8	5.66257	2.13845e-08	0.000127335	0.138949
rs9603820	11747143_x_at	ACSL6	-5.66242	2.14024e-08	0.000127378	-0.67007
rs1378833	11754904_a_at	ZFAND4	-5.66138	2.15262e-08	0.00012805	-0.31685
rs2814778	11728552_a_at	MMP25	5.65851	2.18742e-08	0.000130055	0.250838
rs9603820	11762593_x_at	NUMA1	-5.65711	2.20462e-08	0.000131012	-1.14461
rs7528331	11731135_a_at	LTB4R	5.65684	2.2079e-08	0.000131141	0.337686
rs9603820	11749758_s_at	NA	5.65662	2.21059e-08	0.000131235	0.563422
rs2814778	11717552_s_at	FNBP1L	-5.65613	2.21673e-08	0.000131487	-0.33177
rs2814778	11721465_a_at	OSBPL2	5.6561	2.21705e-08	0.000131487	0.187493
rs2814778	11718305_a_at	PDLIM2	5.65599	2.21848e-08	0.000131505	0.137789
rs117331810	11760311_a_at	SCLY	-5.65387	2.24483e-08	0.000132471	-1.28205
[truncated: 18,119 more rows]
